# Supplementary material
Source: PubMed Central journal article supplement (PMC6522331)
Supplement: NIHMS1524606-supplement-2.pdf [file NIHMS1524606-supplement-2.pdf]

**Table S1.** Metabolite measurement in OPM2 metabolomics

| Name             | KEGG.ID | Condition        | Av         | Std        | CV         | Exp1       | Exp2       | Exp3       | ANOVA      | Sig | Norm_Av    | Norm_Std   |
|------------------|---------|------------------|------------|------------|------------|------------|------------|------------|------------|-----|------------|------------|
| 13BPG            | C00236  | Ctrl             | 11.6289482 | 1.41199284 | 0.12142051 | 10.026838  | 12.6920258 | 12.1679809 | 1.33E-11   | *** | 1          | 0.12142051 |
| 13BPG            | C00236  | HK2-ASO1         | 16.6961845 | 2.02843822 | 0.12149112 | 15.3484373 | 15.711069  | 19.0290472 | 1.33E-11   | *** | 1.4357433  | 0.17443007 |
| 13BPG            | C00236  | DPI              | 6.26015034 | 3.13106756 | 0.50015852 | 2.96546023 | 6.6181751  | 9.19681571 | 1.33E-11   | *** | 0.53832472 | 0.2692477  |
| 13BPG            | C00236  | MET              | 6.26527766 | 0.68447681 | 0.10924924 | 6.70041152 | 6.61911461 | 5.47630685 | 1.33E-11   | *** | 0.53876563 | 0.05885973 |
| 13BPG            | C00236  | PER              | 0          | 0          | NA         | 0          | 0          | 0          | 1.33E-11   | *** | 0          | 0          |
| 13BPG            | C00236  | HK2-ASO1-DPI     | 0          | 0          | NA         | 0          | 0          | 0          | 1.33E-11   | *** | 0          | 0          |
| 13BPG            | C00236  | HK2-ASO1-DPI-PER | 0          | 0          | NA         | 0          | 0          | 0          | 1.33E-11   | *** | 0          | 0          |
| 13BPG            | C00236  | HK2-ASO1-MET     | 0          | 0          | NA         | 0          | 0          | 0          | 1.33E-11   | *** | 0          | 0          |
| 13BPG            | C00236  | HK2-ASO1-MET-PER | 0          | 0          | NA         | 0          | 0          | 0          | 1.33E-11   | *** | 0          | 0          |
| 2-AB             | C02356  | Ctrl             | 2.37237399 | 0.18933067 | 0.07980642 | 2.15420544 | 2.46929425 | 2.4936223  | 0.92097757 |     | 1          | 0.07980642 |
| 2-AB             | C02356  | HK2-ASO1         | 2.55183821 | 0.60772803 | 0.23815304 | NA         | 2.12210959 | 2.98156682 | 0.92097757 |     | 1.07564752 | 0.25616873 |
| 2-AB             | C02356  | DPI              | 2.23841449 | 0.75505626 | 0.33731745 | 1.58668893 | 3.06582518 | 2.06272937 | 0.92097757 |     | 0.94353357 | 0.31827033 |
| 2-AB             | C02356  | MET              | 1.99712714 | 0.95957392 | 0.48047713 | 3.09583231 | 1.32360805 | 1.57194104 | 0.92097757 |     | 0.84182643 | 0.40447835 |
| 2-AB             | C02356  | PER              | 2.17425301 | 0.42415349 | 0.1950801  | 1.86862731 | 2.65850346 | 1.99562827 | 0.92097757 |     | 0.9164883  | 0.17878863 |
| 2-AB             | C02356  | HK2-ASO1-DPI     | 2.29257673 | 0.92993368 | 0.40562816 | 3.34004646 | 1.56419088 | 1.97349284 | 0.92097757 |     | 0.96636396 | 0.39198444 |
| 2-AB             | C02356  | HK2-ASO1-DPI-PER | 2.3097456  | 1.4241753  | 0.61659401 | 0.86561531 | 2.35053177 | 3.71308973 | 0.92097757 |     | 0.97360096 | 0.60031652 |
| 2-AB             | C02356  | HK2-ASO1-MET     | 1.71602326 | 1.08257534 | 0.63086286 | 2.9489657  | 0.92106091 | 1.27804318 | 0.92097757 |     | 0.72333589 | 0.45632575 |
| 2-AB             | C02356  | HK2-ASO1-MET-PER | 1.44656912 | 0.47051913 | 0.32526557 | NA         | 1.11386186 | 1.77927639 | 0.92097757 |     | 0.60975593 | 0.19833261 |
| 2-HG             | C02630  | Ctrl             | 263.462787 | 14.1857974 | 0.05384365 | 249.139539 | 263.741802 | 277.507018 | 4.02E-11   | *** | 1          | 0.05384365 |
| 2-HG             | C02630  | HK2-ASO1         | 361.838502 | 4.50390031 | 0.01244727 | NA         | 365.02324  | 358.653763 | 4.02E-11   | *** | 1.37339511 | 0.01709502 |
| 2-HG             | C02630  | DPI              | 292.462164 | 1.90770744 | 0.00652076 | 292.865375 | 294.135391 | 290.385725 | 4.02E-11   | *** | 1.11007011 | 0.0072385  |
| 2-HG             | C02630  | MET              | 297.280638 | 8.43992223 | 0.02839042 | 298.350928 | 288.356623 | 305.134363 | 4.02E-11   | *** | 1.12835912 | 0.03203459 |
| 2-HG             | C02630  | PER              | 258.030494 | 18.3087238 | 0.07095566 | 262.806808 | 273.477681 | 237.806994 | 4.02E-11   | *** | 0.97939818 | 0.06949264 |
| 2-HG             | C02630  | HK2-ASO1-DPI     | 362.718901 | 12.8010362 | 0.03529189 | 376.35306  | 360.846393 | 350.957248 | 4.02E-11   | *** | 1.37673675 | 0.04858764 |
| 2-HG             | C02630  | HK2-ASO1-DPI-PER | 233.913983 | 8.10613982 | 0.03465436 | 241.968874 | 225.757548 | 234.015528 | 4.02E-11   | *** | 0.88784449 | 0.03076768 |
| 2-HG             | C02630  | HK2-ASO1-MET     | 206.85331  | 23.4116061 | 0.11317975 | 233.08499  | 188.078185 | 199.396754 | 4.02E-11   | *** | 0.78513293 | 0.08886115 |
| 2-HG             | C02630  | HK2-ASO1-MET-PER | 182.294112 | 6.93116142 | 0.03802186 | 187.510504 | 184.942621 | 174.429212 | 4.02E-11   | *** | 0.69191598 | 0.02630793 |
| 2-KB             | C00109  | Ctrl             | 0          | 0          | NA         | 0          | 0          | 0          | 8.40E-18   | *** | NA         | NA         |
| 2-KB             | C00109  | HK2-ASO1         | 0          | 0          | NA         | 0          | 0          | 0          | 8.40E-18   | *** | NA         | NA         |
| 2-KB             | C00109  | DPI              | 0          | 0          | NA         | 0          | 0          | 0          | 8.40E-18   | *** | NA         | NA         |
| 2-KB             | C00109  | MET              | 0          | 0          | NA         | 0          | 0          | 0          | 8.40E-18   | *** | NA         | NA         |
| 2-KB             | C00109  | PER              | 0          | 0          | NA         | 0          | 0          | 0          | 8.40E-18   | *** | NA         | NA         |
| 2-KB             | C00109  | HK2-ASO1-DPI     | 0          | 0          | NA         | 0          | 0          | 0          | 8.40E-18   | *** | NA         | NA         |
| 2-KB             | C00109  | HK2-ASO1-DPI-PER | 0          | 0          | NA         | 0          | 0          | 0          | 8.40E-18   | *** | NA         | NA         |
| 2-KB             | C00109  | HK2-ASO1-MET     | 0.1206086  | NA         | NA         | NA         | 0.1206086  | NA         | 8.40E-18   | *** | Inf        | NA         |
| 2-KB             | C00109  | HK2-ASO1-MET-PER | 0.08938039 | 0.00857155 | 0.09589963 | NA         | 0.09544139 | 0.08331939 | 8.40E-18   | *** | Inf        | Inf        |
| 2-Oxoadipate     | C00322  | Ctrl             | 0.46936362 | 0.10349171 | 0.22049367 | 0.48789397 | 0.35785851 | 0.56233837 | 1.69E-05   | *** | 1          | 0.22049367 |
| 2-Oxoadipate     | C00322  | HK2-ASO1         | 0.46114489 | 0.04613323 | 0.10004064 | 0.50381542 | 0.46742654 | 0.41219271 | 1.69E-05   | *** | 0.98248964 | 0.09828889 |
| 2-Oxoadipate     | C00322  | DPI              | 0.37073405 | 0.16076273 | 0.43363357 | 0.30356152 | 0.55418874 | 0.2544519  | 1.69E-05   | *** | 0.78986533 | 0.34251212 |
| 2-Oxoadipate     | C00322  | MET              | 0.56074654 | 0.15640907 | 0.27893008 | 0.73885347 | 0.49762065 | 0.4457655  | 1.69E-05   | *** | 1.19469536 | 0.33323677 |
| 2-Oxoadipate     | C00322  | PER              | 0.46484799 | 0.1915643  | 0.41212094 | 0.24382841 | 0.56763527 | 0.5830803  | 1.69E-05   | *** | 0.99037926 | 0.40813623 |
| 2-Oxoadipate     | C00322  | HK2-ASO1-DPI     | 1.17000929 | 0.46933114 | 0.40113454 | 0.96327835 | 0.83953324 | 1.70721627 | 1.69E-05   | *** | 2.49275667 | 0.9999308  |
| 2-Oxoadipate     | C00322  | HK2-ASO1-DPI-PER | 1.15203046 | 0.31471348 | 0.27318156 | 0.91835732 | 1.50989031 | 1.02784376 | 1.69E-05   | *** | 2.45445198 | 0.0551102  |
| 2-Oxoadipate     | C00322  | HK2-ASO1-MET     | 1.29712156 | 0.27094065 | 0.20887838 | 1.09034365 | 1.60383539 | 1.19718564 | 1.69E-05   | *** | 2.763575   | 0.57725106 |
| 2-Oxoadipate     | C00322  | HK2-ASO1-MET-PER | 1.74832493 | 0.33799362 | 0.19333226 | 2.09369631 | 1.41822689 | 1.7330516  | 1.69E-05   | *** | 3.7248838  | 0.7201104  |
| 2-Oxosuccinamate | C02362  | Ctrl             | 0.51280278 | 0.63654357 | 1.24130287 | 1.24293483 | 0.2120041  | 0.07446942 | 0.00160914 | **  | 1          | 1.24130287 |
| 2-Oxosuccinamate | C02362  | HK2-ASO1         | 0.26916034 | 0.03589988 | 0.13337729 | NA         | 0.2437753  | 0.29454539 | 0.00160914 | **  | 0.52488082 | 0.07000718 |
| 2-Oxosuccinamate | C02362  | DPI              | 0.62268688 | 0.35746909 | 0.57407518 | 0.98589433 | 0.61091959 | 0.27124674 | 0.00160914 | **  | 1.2142814  | 0.69708882 |
| 2-Oxosuccinamate | C02362  | MET              | 0.28924404 | 0.18752134 | 0.6483153  | 0.42184166 | NA         | 0.15664643 | 0.00160914 | **  | 0.56404539 | 0.36567925 |
| 2-Oxosuccinamate | C02362  | PER              | 1.09086659 | 1.12451387 | 1.03084454 | 2.3821618  | 0.56332472 | 0.32711325 | 0.00160914 | **  | 2.1272634  | 2.19287786 |
| 2-Oxosuccinamate | C02362  | HK2-ASO1-DPI     | 3.04266629 | 0.98988939 | 0.32533617 | 1.91104272 | 3.46900741 | 3.74794874 | 0.00160914 | **  | 5.9334044  | 1.93035104 |
| 2-Oxosuccinamate | C02362  | HK2-ASO1-DPI-PER | 0.97503822 | 0.27462594 | 0.28165659 | 1.27891485 | 0.90160885 | 0.74459097 | 0.00160914 | **  | 1.90139027 | 0.5355391  |
| 2-Oxosuccinamate | C02362  | HK2-ASO1-MET     | 0.44291461 | 0.37346704 | 0.84320325 | 0.08137696 | 0.42010169 | 0.82726518 | 0.00160914 | **  | 0.86371335 | 0.7282859  |
| 2-Oxosuccinamate | C02362  | HK2-ASO1-MET-PER | 0.54521102 | 0.1047105  | 0.192055   | 0.62802848 | 0.58009279 | 0.42751179 | 0.00160914 | **  | 1.06319825 | 0.20419254 |
| 3PG              | C00197  | Ctrl             | 33.4572451 | 2.20060397 | 0.06577362 | 30.9613835 | 34.2920606 | 35.1182911 | 4.86E-07   | *** | 1          | 0.06577362 |
| 3PG              | C00197  | HK2-ASO1         | 22.3912763 | 5.21125096 | 0.23273577 | 28.3423309 | 18.6438369 | 20.187661  | 4.86E-07   | *** | 0.66925045 | 0.15575852 |
| 3PG              | C00197  | DPI              | 32.0862942 | 4.39222429 | 0.13688786 | 37.1321529 | 29.1205139 | 30.0062159 | 4.86E-07   | *** | 0.9590238  | 0.13127872 |
| 3PG              | C00197  | MET              | 22.3683639 | 4.2137867  | 0.18838152 | 17.8021798 | 24.8599964 | 24.7419156 | 4.86E-07   | *** | 0.66856562 | 0.15294542 |
| 3PG              | C00197  | PER              | 46.4614848 | 3.01010344 | 0.06478707 | 49.3375807 | 43.3332366 | 46.7136372 | 4.86E-07   | *** | 1.38868232 | 0.08996866 |
| 3PG              | C00197  | HK2-ASO1-DPI     | 21.9481848 | 0.9593976  | 0.04371193 | 22.95011   | 21.0378897 | 21.8565547 | 4.86E-07   | *** | 0.65606094 | 0.02867533 |
| 3PG              | C00197  | HK2-ASO1-DPI-PER | 11.7873497 | 2.92506793 | 0.24815315 | 12.6632019 | 8.5244131  | 14.1744342 | 4.86E-07   | *** | 0.35231083 | 0.08742704 |
| 3PG              | C00197  | HK2-ASO1-MET     | 22.1406235 | 5.47804678 | 0.24742062 | 27.6501323 | 16.6945904 | 22.0771476 | 4.86E-07   | *** | 0.66175871 | 0.16373275 |
| 3PG              | C00197  | HK2-ASO1-MET-PER | 25.3152907 | 5.45413996 | 0.21544844 | 23.8960365 | 31.3387611 | 20.7110744 | 4.86E-07   | *** | 0.756646   | 0.1630182  |
| 4-OH-PheLac      | C03672  | Ctrl             | 69.2304088 | 4.78254862 | 0.06908162 | 64.9816141 | 68.2997155 | 74.4098968 | 4.71E-18   | *** | 1          | 0.06908162 |
| 4-OH-PheLac      | C03672  | HK2-ASO1         | 14.7435964 | 1.23389954 | 0.08369054 | NA         | 13.8710977 | 15.6160952 | 4.71E-18   | *** | 0.21296417 | 0.01782309 |
| 4-OH-PheLac      | C03672  | DPI              | 136.426063 | 5.9846297  | 0.0438672  | 141.528508 | 129.838805 | 137.910875 | 4.71E-18   | *** | 1.97060894 | 0.0864451  |
| 4-OH-PheLac      | C03672  | MET              | 154.550422 | 10.3943278 | 0.06725525 | 158.534823 | 162.36309  | 142.753352 | 4.71E-18   | *** | 2.2324066  | 0.15014107 |
| 4-OH-PheLac      | C03672  | PER              | 82.44516   | 5.6574809  | 0.06862114 | 79.3396442 | 88.9752584 | 79.0205774 | 4.71E-18   | *** | 1.19088073 | 0.08171959 |
| 4-OH-PheLac      | C03672  | HK2-ASO1-DPI     | 18.5690753 | 1.82224734 | 0.09813345 | 17.8027199 | 17.2551644 | 20.6493417 | 4.71E-18   | *** | 0.26822137 | 0.02632149 |
| 4-OH-PheLac      | C03672  | HK2-ASO1-DPI-PER | 5.90452128 | 1.36732267 | 0.23157215 | 7.44178596 | 4.82414501 | 5.44763288 | 4.71E-18   | *** | 0.08528797 | 0.01975032 |
| 4-OH-PheLac      | C03672  | HK2-ASO1-MET     | 4.99301748 | 0.42529195 | 0.08517734 | 4.55589489 | 5.0        |            |            |     |            |            |

|              |        |                  |            |             |            |            |            |            |            |     |            |            |            |
|--------------|--------|------------------|------------|-------------|------------|------------|------------|------------|------------|-----|------------|------------|------------|
| 5M-adenosine | C00170 | Ctrl             | 468.087125 | 42.5070888  | 0.09081021 | 502.440673 | 481.270323 | 420.550379 | 2.42E-08   | *** |            | 1          | 0.09081021 |
| 5M-adenosine | C00170 | HK2-ASO1         | 572.447001 | 81.9161929  | 0.1430983  | 562.777207 | 478.226442 | 612.337353 | 2.42E-08   | *** | 1.22294968 | 0.17500202 |            |
| 5M-adenosine | C00170 | DPI              | 540.139255 | 47.9248     | 0.08872675 | 563.058524 | 572.300908 | 485.058332 | 2.42E-08   | *** | 1.15392889 | 0.10238436 |            |
| 5M-adenosine | C00170 | MET              | 415.909765 | 29.4503232  | 0.07080941 | 438.808728 | 426.232965 | 382.687602 | 2.42E-08   | *** | 0.88853067 | 0.06291633 |            |
| 5M-adenosine | C00170 | PER              | 477.335914 | 57.0119135  | 0.11943772 | 505.732934 | 514.572462 | 411.702346 | 2.42E-08   | *** | 1.01975869 | 0.12179765 |            |
| 5M-adenosine | C00170 | HK2-ASO1-DPI     | 839.123949 | 49.2492894  | 0.05869132 | 787.534662 | 844.196583 | 885.640601 | 2.42E-08   | *** | 1.79266616 | 0.10521394 |            |
| 5M-adenosine | C00170 | HK2-ASO1-DPI-PER | 869.805816 | 86.8742521  | 0.09987775 | 968.07136  | 838.13866  | 803.207427 | 2.42E-08   | *** | 1.8582135  | 0.18559419 |            |
| 5M-adenosine | C00170 | HK2-ASO1-MET     | 870.239874 | 35.8381486  | 0.04118192 | 911.416123 | 846.079589 | 853.223911 | 2.42E-08   | *** | 1.8591408  | 0.07656299 |            |
| 5M-adenosine | C00170 | HK2-ASO1-MET-PER | 585.697249 | 93.8609578  | 0.16025508 | 687.392481 | 567.306364 | 502.392903 | 2.42E-08   | *** | 1.25125691 | 0.20052027 |            |
| A            | C00212 | Ctrl             | 9.68986202 | 7.36259209  | 0.75982424 | 6.72265084 | 4.27386576 | 18.0730695 | 0.02785008 | *   | 1          | 0.75982424 |            |
| A            | C00212 | HK2-ASO1         | 4.0404355  | 1.88045251  | 0.46540837 | 2.31855788 | 3.75575015 | 6.04699848 | 0.02785008 | *   | 0.41697555 | 0.19406391 |            |
| A            | C00212 | DPI              | 4.8478077  | 1.60668841  | 0.33142577 | 6.48311949 | 3.27136054 | 4.78894308 | 0.02785008 | *   | 0.50029688 | 0.16581128 |            |
| A            | C00212 | MET              | 5.58993877 | 1.19980849  | 0.21463714 | 6.246183   | 6.31848503 | 4.20514829 | 0.02785008 | *   | 0.57688528 | 0.12382101 |            |
| A            | C00212 | PER              | 12.1492771 | 11.7614445  | 0.96807102 | 6.74095811 | 4.06482496 | 25.6420483 | 0.02785008 | *   | 1.25381322 | 1.21378865 |            |
| A            | C00212 | HK2-ASO1-DPI     | 17.1396318 | 9.871131353 | 0.57593498 | 7.36662763 | 16.9458659 | 27.1064019 | 0.02785008 | *   | 1.76882104 | 0.10872591 |            |
| A            | C00212 | HK2-ASO1-DPI-PER | 1.25604801 | 0.41586461  | 0.33108974 | 1.49543209 | 1.49686232 | 0.77584963 | 0.02785008 | *   | 0.12962496 | 0.0429175  |            |
| A            | C00212 | HK2-ASO1-MET     | 1.02075292 | 1.00501198  | 0.98457908 | 0.36449115 | 0.52000538 | 2.17776223 | 0.02785008 | *   | 0.10534236 | 0.10371788 |            |
| A            | C00212 | HK2-ASO1-MET-PER | 0.39352054 | 0.28207606  | 0.71680136 | 0.71490819 | 0.27864582 | 0.18700762 | 0.02785008 | *   | 0.04061157 | 0.02911043 |            |
| a-KG         | C00026 | Ctrl             | 35.4460735 | 5.88125182  | 0.16592111 | 41.004292  | 36.0461326 | 29.2877959 | 9.75E-13   | *** | 1          | 0.16592111 |            |
| a-KG         | C00026 | HK2-ASO1         | 24.8124507 | 1.11079094  | 0.04476748 | NA         | 24.0270029 | 25.5978985 | 9.75E-13   | *** | 0.70000562 | 0.03133749 |            |
| a-KG         | C00026 | DPI              | 122.653608 | 19.2431393  | 0.15689012 | 131.712808 | 135.695194 | 100.552822 | 9.75E-13   | *** | 3.46028758 | 0.54288493 |            |
| a-KG         | C00026 | MET              | 140.316954 | 7.10340096  | 0.05062397 | 137.868784 | 134.761426 | 148.320652 | 9.75E-13   | *** | 3.9586036  | 0.20040022 |            |
| a-KG         | C00026 | PER              | 47.2156281 | 5.97531088  | 0.12655367 | 47.9177241 | 52.8088639 | 40.9202783 | 9.75E-13   | *** | 1.33204114 | 0.16857469 |            |
| a-KG         | C00026 | HK2-ASO1-DPI     | 21.721765  | 2.86397799  | 0.13184831 | 18.6650391 | 24.3431467 | 22.1571091 | 9.75E-13   | *** | 0.6128116  | 0.08079817 |            |
| a-KG         | C00026 | HK2-ASO1-DPI-PER | 19.3976096 | 5.32834588  | 0.27469085 | 22.626939  | 13.2475459 | 22.3183438 | 9.75E-13   | *** | 0.54724283 | 0.15322426 |            |
| a-KG         | C00026 | HK2-ASO1-MET     | 27.4718873 | 3.90895199  | 0.14228917 | 29.1113064 | 30.2941737 | 23.0101818 | 9.75E-13   | *** | 0.7750333  | 0.11027884 |            |
| a-KG         | C00026 | HK2-ASO1-MET-PER | 20.9118208 | 2.56627758  | 0.12271899 | 18.0808349 | 21.569079  | 23.0855484 | 9.75E-13   | *** | 0.58996156 | 0.07239949 |            |
| Ac-carnitine | C02571 | Ctrl             | 384.780749 | 14.1998528  | 0.03690375 | 391.938934 | 393.976871 | 368.426442 | 3.32E-18   | *** | 1          | 0.03690375 |            |
| Ac-carnitine | C02571 | HK2-ASO1         | 158.565313 | 14.922285   | 0.09410813 | 156.471445 | 144.80055  | 174.423944 | 3.32E-18   | *** | 0.41209264 | 0.03878127 |            |
| Ac-carnitine | C02571 | DPI              | 682.56722  | 45.5786211  | 0.06677529 | 652.95523  | 659.693536 | 735.052895 | 3.32E-18   | *** | 1.77391208 | 0.11845349 |            |
| Ac-carnitine | C02571 | MET              | 620.945344 | 36.9565464  | 0.05951659 | 612.529674 | 661.383949 | 588.922409 | 3.32E-18   | *** | 1.61376406 | 0.09604573 |            |
| Ac-carnitine | C02571 | PER              | 399.513247 | 25.6445155  | 0.0641894  | 381.879681 | 428.93183  | 387.728228 | 3.32E-18   | *** | 1.03828803 | 0.06664709 |            |
| Ac-carnitine | C02571 | HK2-ASO1-DPI     | 146.661371 | 7.94511493  | 0.05417319 | 152.320467 | 137.578358 | 150.085289 | 3.32E-18   | *** | 0.38115569 | 0.02064842 |            |
| Ac-carnitine | C02571 | HK2-ASO1-DPI-PER | 55.3405375 | 7.08109697  | 0.12795497 | 63.2107207 | 49.4852646 | 53.3256272 | 3.32E-18   | *** | 0.14382356 | 0.01840294 |            |
| Ac-carnitine | C02571 | HK2-ASO1-MET     | 54.4951261 | 4.76385972  | 0.08741809 | 53.4908665 | 59.6810532 | 50.3134588 | 3.32E-18   | *** | 0.14162644 | 0.01238071 |            |
| Ac-carnitine | C02571 | HK2-ASO1-MET-PER | 39.5975196 | 6.1614621   | 0.15560222 | 45.3519535 | 40.3436275 | 33.0969778 | 3.32E-18   | *** | 0.10290931 | 0.01601922 |            |
| Ac-choline   | C01996 | Ctrl             | 89.6378666 | 3.78591248  | 0.04223564 | 87.5594554 | 87.3464132 | 94.007731  | 1.99E-15   | *** | 1          | 0.04223564 |            |
| Ac-choline   | C01996 | HK2-ASO1         | 69.8685327 | 8.45880024  | 0.12106738 | 77.1999147 | 60.6136172 | 71.792066  | 1.99E-15   | *** | 0.77945332 | 0.09436637 |            |
| Ac-choline   | C01996 | DPI              | 91.8528084 | 3.59763616  | 0.03916741 | 88.7082194 | 91.0742188 | 95.775987  | 1.99E-15   | *** | 1.02470989 | 0.04013523 |            |
| Ac-choline   | C01996 | MET              | 74.8598386 | 5.30789594  | 0.07090445 | 78.1429779 | 77.7004009 | 68.7361371 | 1.99E-15   | *** | 0.83513633 | 0.05921488 |            |
| Ac-choline   | C01996 | PER              | 107.506161 | 5.80146961  | 0.05396407 | 102.640473 | 113.926594 | 105.951418 | 1.99E-15   | *** | 1.19933869 | 0.06472119 |            |
| Ac-choline   | C01996 | HK2-ASO1-DPI     | 42.8841816 | 1.91797179  | 0.04472446 | 43.8119675 | 40.6787302 | 44.1618471 | 1.99E-15   | *** | 0.47841591 | 0.02139687 |            |
| Ac-choline   | C01996 | HK2-ASO1-DPI-PER | 27.0578092 | 3.1494398   | 0.1163967  | 30.187059  | 23.8885604 | 27.0978083 | 1.99E-15   | *** | 0.30185691 | 0.03513515 |            |
| Ac-choline   | C01996 | HK2-ASO1-MET     | 13.6021672 | 4.09290694  | 0.30090109 | 18.0611631 | 12.7290998 | 10.0162386 | 1.99E-15   | *** | 0.15174577 | 0.04566047 |            |
| Ac-choline   | C01996 | HK2-ASO1-MET-PER | 13.9468099 | 2.45550722  | 0.17606228 | 16.7043962 | 13.1392465 | 11.9967869 | 1.99E-15   | *** | 0.15559061 | 0.02739364 |            |
| Acetyl-CoA   | C00024 | Ctrl             | 2.34035926 | 0.40226707  | 0.17188261 | 2.63673045 | 2.50191854 | 1.8824288  | 3.58E-06   | *** | 1          | 0.17188261 |            |
| Acetyl-CoA   | C00024 | HK2-ASO1         | 1.59029883 | 0.09610831  | 0.06043412 | 1.5316959  | 1.53798485 | 1.70121574 | 3.58E-06   | *** | 0.67951056 | 0.04106562 |            |
| Acetyl-CoA   | C00024 | DPI              | 2.18362177 | 0.18678788  | 0.08554004 | 2.02220898 | 2.14043651 | 2.38821983 | 3.58E-06   | *** | 0.93302845 | 0.07981163 |            |
| Acetyl-CoA   | C00024 | MET              | 1.54880744 | 0.07216314  | 0.04659271 | 1.62908941 | 1.5279958  | 1.48933712 | 3.58E-06   | *** | 0.66178192 | 0.03083422 |            |
| Acetyl-CoA   | C00024 | PER              | 1.88314216 | 0.82095298  | 0.43594849 | 2.30936479 | 2.40332103 | 0.93674066 | 3.58E-06   | *** | 0.80463807 | 0.35078075 |            |
| Acetyl-CoA   | C00024 | HK2-ASO1-DPI     | 1.28252205 | 0.07750515  | 0.06043183 | 1.24177564 | 1.23388913 | 1.37190138 | 3.58E-06   | *** | 0.54800221 | 0.03311677 |            |
| Acetyl-CoA   | C00024 | HK2-ASO1-DPI-PER | 0.81231728 | 0.02810326  | 0.03459641 | 0.83346985 | 0.82305344 | 0.78042856 | 3.58E-06   | *** | 0.34709085 | 0.0120081  |            |
| Acetyl-CoA   | C00024 | HK2-ASO1-MET     | 0.58678289 | 0.12984278  | 0.22127909 | 0.72653116 | 0.56394026 | 0.46987723 | 3.58E-06   | *** | 0.25072342 | 0.05547985 |            |
| Acetyl-CoA   | C00024 | HK2-ASO1-MET-PER | 0.48590834 | 0.03685393  | 0.07584543 | 0.48499503 | 0.52321044 | 0.44951956 | 3.58E-06   | *** | 0.20762126 | 0.01574812 |            |
| Aconitate    | C00417 | Ctrl             | 59.2261376 | 7.27871723  | 0.13049504 | 64.828663  | 62.4408414 | 50.4089085 | 5.01E-14   | *** | 1          | 0.13049504 |            |
| Aconitate    | C00417 | HK2-ASO1         | 31.3315996 | 3.68255207  | 0.1175347  | 31.2924399 | 27.6687562 | 35.0335489 | 5.01E-14   | *** | 0.52901643 | 0.06217782 |            |
| Aconitate    | C00417 | DPI              | 40.5457726 | 2.14259669  | 0.0528439  | 43.0131875 | 39.1551636 | 39.4689665 | 5.01E-14   | *** | 0.68459255 | 0.03617554 |            |
| Aconitate    | C00417 | MET              | 30.1922638 | 4.71615737  | 0.15620417 | 32.0255327 | 33.7165172 | 24.8347416 | 5.01E-14   | *** | 0.50979398 | 0.07962966 |            |
| Aconitate    | C00417 | PER              | 53.1003667 | 3.49111185  | 0.06574553 | 55.7895846 | 54.3565157 | 49.1549997 | 5.01E-14   | *** | 0.8965698  | 0.05894546 |            |
| Aconitate    | C00417 | HK2-ASO1-DPI     | 12.9443043 | 1.19098871  | 0.09200871 | 11.5765162 | 13.7519756 | 13.5044211 | 5.01E-14   | *** | 0.21855729 | 0.02010917 |            |
| Aconitate    | C00417 | HK2-ASO1-DPI-PER | 2.64843809 | 0.92400724  | 0.34888761 | 3.68312583 | 2.35660551 | 1.90558293 | 5.01E-14   | *** | 0.04471739 | 0.01560134 |            |
| Aconitate    | C00417 | HK2-ASO1-MET     | 1.8696273  | 0.21974145  | 0.18512919 | 1.31890701 | 1.30868537 | 0.9332958  | 5.01E-14   | *** | 0.0200412  | 0.00371021 |            |
| Aconitate    | C00417 | HK2-ASO1-MET-PER | 0.37471388 | 0.23537224  | 0.62813857 | 0.12737272 | 0.59593883 | 0.40083008 | 5.01E-14   | *** | 0.00632683 | 0.00397413 |            |
| Adenine      | C00147 | Ctrl             | 11.8510498 | 12.5705799  | 1.06071446 | 2.98237945 | 6.33402857 | 26.2367414 | 0.02418632 | *   | 1          | 1.06071446 |            |
| Adenine      | C00147 | HK2-ASO1         | 8.03675733 | 1.16101549  | 0.14446318 | 7.27353939 | 7.4638608  | 9.3728718  | 0.02418632 | *   | 0.67814729 | 0.09796731 |            |
| Adenine      | C00147 | DPI              | 5.1636169  | 2.95206939  | 0.57170573 | 2.90461315 | 4.0823745  | 8.50386304 | 0.02418632 | *   | 0.43570966 | 0.24909771 |            |
| Adenine      | C00147 | MET              | 17.3869591 | 8.36928307  | 0.48135404 | 21.2744161 | 23.1055186 | 7.78094257 | 0.02418632 | *   | 1.46712396 | 0.70620605 |            |
| Adenine      | C00147 | PER              | 20.9632718 | 16.8550553  | 0.8040279  | 3.58481267 | 22.0640391 | 37.2409635 | 0.02418632 | *   | 1.76889576 | 1.42224154 |            |
| Adenine      | C00147 | HK2-ASO1-DPI     | 1.15449369 | 0.46817852  | 0.40552714 | 1.29768263 | 1.53435666 | 0.63144177 | 0.02418632 | *   | 0.097417   | 0.03950524 |            |
| Adenine      | C00147 | HK2-ASO1-DPI-PER | 0.5475997  | 0.34561052  | 0.63113717 | 0.92975818 | 0.45608351 | 0.2569574  | 0.02418632 | *   | 0.04620685 | 0.02916286 |            |
| Adenine      | C00147 | HK2-ASO1-MET     | 1.60290839 | 1.78370393  | 1.11279218 | 0.87163038 | 0.30105705 | 3.63603775 | 0.02418632 | *   | 0.13525455 | 0.15051072 |            |
| Adenine      | C00147 | HK2-ASO1-MET-PER | 0.79918947 | 0.19313895  | 0.24166854 | 0.92985865 | 0.89036951 | 0.57734025 | 0.02418632 | *   | 0.06743618 | 0.0162972  |            |
| ADP          | C00008 | Ctrl             | 234.316084 | 11.2703711  | 0.04809901 | 221        |            |            |            |     |            |            |            |

|          |        |                  |            |            |            |            |            |            |            |     |            |             |
|----------|--------|------------------|------------|------------|------------|------------|------------|------------|------------|-----|------------|-------------|
| ADP/ATP  | NA     | DPI              | 0.8518848  | 0.08126032 | 0.09538883 | 0.8042695  | 0.80567227 | 0.94571264 | 5.50E-17   | *** | 1.50114293 | 0.14319231  |
| ADP/ATP  | NA     | MET              | 1.13822945 | 0.05296094 | 0.04652926 | 1.19431824 | 1.08908062 | 1.13128949 | 5.50E-17   | *** | 2.00572317 | 0.09332476  |
| ADP/ATP  | NA     | PER              | 0.5248081  | 0.02998388 | 0.05713304 | 0.52114604 | 0.49682344 | 0.55645482 | 5.50E-17   | *** | 0.92478697 | 0.05283589  |
| ADP/ATP  | NA     | HK2-ASO1-DPI     | 0.91294129 | 0.02041199 | 0.0223585  | 0.93402029 | 0.91153448 | 0.89326909 | 5.50E-17   | *** | 1.60873318 | 0.03596885  |
| ADP/ATP  | NA     | HK2-ASO1-DPI-PER | 2.47145572 | 0.19071733 | 0.07716801 | 2.2716141  | 2.4912479  | 2.65150515 | 5.50E-17   | *** | 4.35505863 | 0.336607123 |
| ADP/ATP  | NA     | HK2-ASO1-MET     | 3.01998536 | 0.20687884 | 0.06850326 | 2.97484294 | 2.8394052  | 3.24570793 | 5.50E-17   | *** | 5.32164635 | 0.36455012  |
| ADP/ATP  | NA     | HK2-ASO1-MET-PER | 4.32934641 | 0.30192402 | 0.06973894 | 4.05067521 | 4.28725742 | 4.65010666 | 5.50E-17   | *** | 7.62892789 | 0.53203332  |
| Ala      | C00041 | Ctrl             | 1411.75481 | 65.860276  | 0.04665136 | 1342.71665 | 1473.89409 | 1418.6537  | 1.45E-12   | *** | 1          | 0.04665136  |
| Ala      | C00041 | HK2-ASO1         | 792.987197 | 58.7844455 | 0.07413038 | 860.760065 | 755.823595 | 762.377931 | 1.45E-12   | *** | 0.5617032  | 0.04163927  |
| Ala      | C00041 | DPI              | 1536.79095 | 225.326202 | 0.14662124 | 1293.48305 | 1578.61479 | 1738.27501 | 1.45E-12   | *** | 1.08856789 | 0.15960718  |
| Ala      | C00041 | MET              | 1481.95029 | 147.349259 | 0.09942929 | 1652.09331 | 1396.31475 | 1397.4428  | 1.45E-12   | *** | 1.04972214 | 0.10437312  |
| Ala      | C00041 | PER              | 1626.33591 | 87.9943187 | 0.05410587 | 1541.051   | 1716.80998 | 1621.14674 | 1.45E-12   | *** | 1.15199601 | 0.06232975  |
| Ala      | C00041 | HK2-ASO1-DPI     | 796.54156  | 93.5379641 | 0.11743011 | 858.425981 | 842.261529 | 688.937172 | 1.45E-12   | *** | 0.56422089 | 0.06625652  |
| Ala      | C00041 | HK2-ASO1-DPI-PER | 359.324559 | 31.3142142 | 0.08714744 | 385.515167 | 324.639465 | 367.819045 | 1.45E-12   | *** | 0.25452335 | 0.02218106  |
| Ala      | C00041 | HK2-ASO1-MET     | 337.811654 | 70.3314836 | 0.20819733 | 397.676718 | 260.353885 | 355.40436  | 1.45E-12   | *** | 0.23928493 | 0.04981848  |
| Ala      | C00041 | HK2-ASO1-MET-PER | 282.70424  | 33.2861645 | 0.11774201 | 275.818632 | 318.894716 | 253.399371 | 1.45E-12   | *** | 0.20025024 | 0.02357787  |
| AMP      | C00020 | Ctrl             | 67.4838101 | 20.9827861 | 0.31093067 | 58.8175805 | 52.222915  | 91.4115583 | 4.02E-10   | *** | 1          | 0.31093067  |
| AMP      | C00020 | HK2-ASO1         | 106.867672 | 13.0288184 | 0.12191543 | 121.270467 | 95.9020051 | 103.430543 | 4.02E-10   | *** | 1.58360459 | 0.19306584  |
| AMP      | C00020 | DPI              | 159.8143   | 13.3781143 | 0.08371037 | 174.07474  | 147.540752 | 157.827409 | 4.02E-10   | *** | 2.36818727 | 0.19824183  |
| AMP      | C00020 | MET              | 218.438158 | 33.3757799 | 0.15279281 | 245.79014  | 228.274814 | 181.249522 | 4.02E-10   | *** | 3.23689723 | 0.49457462  |
| AMP      | C00020 | PER              | 100.008082 | 6.93165017 | 0.06931099 | 105.436908 | 92.2001771 | 102.387161 | 4.02E-10   | *** | 1.48195666 | 0.10271575  |
| AMP      | C00020 | HK2-ASO1-DPI     | 136.170043 | 3.3232395  | 0.02440569 | 135.478269 | 133.247051 | 139.784809 | 4.02E-10   | *** | 2.01781795 | 0.04924624  |
| AMP      | C00020 | HK2-ASO1-DPI-PER | 61.5329624 | 7.44062371 | 0.12092094 | 66.7959405 | 53.0202595 | 64.7826873 | 4.02E-10   | *** | 0.91181814 | 0.11025791  |
| AMP      | C00020 | HK2-ASO1-MET     | 68.7169149 | 0.92335898 | 0.01343741 | 67.6564412 | 69.151556  | 69.3427474 | 4.02E-10   | *** | 1.0182726  | 0.01368267  |
| AMP      | C00020 | HK2-ASO1-MET-PER | 38.8653357 | 6.27839043 | 0.16154216 | 45.3441222 | 38.4432427 | 32.8086423 | 4.02E-10   | *** | 0.57592089 | 0.09303551  |
| AMP/ATP  | NA     | Ctrl             | 0.16511177 | 0.05966853 | 0.36138267 | 0.14510609 | 0.11801677 | 0.23221245 | 3.49E-13   | *** | 1          | 0.36138267  |
| AMP/ATP  | NA     | HK2-ASO1         | 0.29234166 | 0.00021726 | 0.00074318 | 0.29252662 | 0.29239559 | 0.29210239 | 3.49E-13   | *** | 1.77056824 | 0.00131586  |
| AMP/ATP  | NA     | DPI              | 0.40258702 | 0.05296541 | 0.13156264 | 0.45670634 | 0.40019837 | 0.40019837 | 3.49E-13   | *** | 2.43826966 | 0.02187518  |
| AMP/ATP  | NA     | MET              | 0.77159511 | 0.06169576 | 0.07995872 | 0.81810662 | 0.79507131 | 0.7016074  | 3.49E-13   | *** | 4.67316842 | 0.37366055  |
| AMP/ATP  | NA     | PER              | 0.23000062 | 0.02741609 | 0.11920006 | 0.24503227 | 0.19835641 | 0.24661317 | 3.49E-13   | *** | 1.39299953 | 0.16604563  |
| AMP/ATP  | NA     | HK2-ASO1-DPI     | 0.62644562 | 0.03594419 | 0.05737799 | 0.58501057 | 0.64508047 | 0.64924582 | 3.49E-13   | *** | 3.79407003 | 0.21769612  |
| AMP/ATP  | NA     | HK2-ASO1-DPI-PER | 1.43802166 | 0.16215339 | 0.11276144 | 1.2933964  | 1.40734706 | 1.61332153 | 3.49E-13   | *** | 8.70938311 | 0.98208254  |
| AMP/ATP  | NA     | HK2-ASO1-MET     | 2.20144334 | 0.49741793 | 0.22559082 | 1.77192191 | 2.08596458 | 2.74644351 | 3.49E-13   | *** | 13.3330491 | 3.01261339  |
| AMP/ATP  | NA     | HK2-ASO1-MET-PER | 3.06956185 | 0.0578335  | 0.01884096 | 3.07149048 | 3.12640692 | 3.01078816 | 3.49E-13   | *** | 18.5908119 | 0.35026888  |
| Arg      | C00062 | Ctrl             | 3531.63983 | 256.679221 | 0.07267999 | 3281.00498 | 3519.95049 | 3793.96401 | 0.00010055 | *** | 1          | 0.07267999  |
| Arg      | C00062 | HK2-ASO1         | 4910.60579 | 163.618312 | 0.03331937 | NA         | 5026.30141 | 4794.91017 | 0.00010055 | *** | 1.39046053 | 0.04632927  |
| Arg      | C00062 | DPI              | 4737.60535 | 725.058039 | 0.15304315 | 3999.64763 | 4764.13282 | 5449.03561 | 0.00010055 | *** | 1.34147466 | 0.20530351  |
| Arg      | C00062 | MET              | 5081.57022 | 566.440461 | 0.11146957 | 5687.46813 | 4565.26573 | 4991.97678 | 0.00010055 | *** | 1.43886989 | 0.16039021  |
| Arg      | C00062 | PER              | 3694.84704 | 168.406522 | 0.04557875 | 3888.94446 | 3608.06479 | 3587.53187 | 0.00010055 | *** | 1.04621287 | 0.04768508  |
| Arg      | C00062 | HK2-ASO1-DPI     | 7284.439   | 156.862338 | 0.02153389 | 7426.68228 | 7310.43032 | 7116.20438 | 0.00010055 | *** | 2.06262228 | 0.04441629  |
| Arg      | C00062 | HK2-ASO1-DPI-PER | 5244.8749  | 664.471334 | 0.12668964 | 5864.91564 | 4543.46692 | 5326.24214 | 0.00010055 | *** | 1.48511036 | 0.1881481   |
| Arg      | C00062 | HK2-ASO1-MET     | 5884.29942 | 1348.16063 | 0.22911149 | 5857.78392 | 4549.59211 | 7245.52222 | 0.00010055 | *** | 1.66616634 | 0.38173786  |
| Arg      | C00062 | HK2-ASO1-MET-PER | 4789.2125  | 645.750763 | 0.13483444 | 4509.28944 | 5527.69417 | 4330.65388 | 0.00010055 | *** | 1.35608746 | 0.18284729  |
| Arg-Succ | C03406 | Ctrl             | 13.398751  | 0.25237994 | 0.01883608 | 13.2604576 | 13.245745  | 13.6900504 | 1.98E-14   | *** | 1          | 0.18838608  |
| Arg-Succ | C03406 | HK2-ASO1         | 8.93168256 | 1.42537773 | 0.1595867  | 8.48340955 | 7.78432712 | 10.527311  | 1.98E-14   | *** | 0.66660561 | 0.10638139  |
| Arg-Succ | C03406 | DPI              | 38.6379349 | 3.82652579 | 0.09903546 | 42.981062  | 37.1701005 | 35.7626422 | 1.98E-14   | *** | 2.88369676 | 0.28558825  |
| Arg-Succ | C03406 | MET              | 41.0659793 | 3.53419376 | 0.08606135 | 41.8676391 | 44.1304822 | 37.1988165 | 1.98E-14   | *** | 3.064911   | 0.26377039  |
| Arg-Succ | C03406 | PER              | 19.4949202 | 0.70453669 | 0.0361395  | 19.8719193 | 19.9307409 | 18.6821005 | 1.98E-14   | *** | 1.45498041 | 0.05258227  |
| Arg-Succ | C03406 | HK2-ASO1-DPI     | 14.2450148 | 0.77627323 | 0.05449438 | 14.1102116 | 13.5449717 | 15.0798609 | 1.98E-14   | *** | 1.0631599  | 0.05793624  |
| Arg-Succ | C03406 | HK2-ASO1-DPI-PER | 10.2790015 | 1.53818    | 0.14964294 | 11.7399475 | 8.6737569  | 10.4233001 | 1.98E-14   | *** | 0.76716117 | 0.11480025  |
| Arg-Succ | C03406 | HK2-ASO1-MET     | 8.02526976 | 1.01132882 | 0.12601805 | 8.74036792 | 8.46725926 | 6.86818209 | 1.98E-14   | *** | 0.59895656 | 0.07547934  |
| Arg-Succ | C03406 | HK2-ASO1-MET-PER | 6.27198454 | 1.00908642 | 0.1608879  | 7.01120988 | 6.68238137 | 5.12236237 | 1.98E-14   | *** | 0.46810218 | 0.07531198  |
| Asn      | C00152 | Ctrl             | 1632.2737  | 73.4370251 | 0.04499063 | 1558.18777 | 1633.5892  | 1705.04415 | 6.99E-10   | *** | 1          | 0.04499063  |
| Asn      | C00152 | HK2-ASO1         | 1899.5524  | 121.820447 | 0.06413113 | 1988.74639 | 1760.7559  | 1949.15489 | 6.99E-10   | *** | 1.16374625 | 0.07463237  |
| Asn      | C00152 | DPI              | 1827.19788 | 185.126033 | 0.1013169  | 1702.73513 | 1738.91874 | 2039.93977 | 6.99E-10   | *** | 1.11941881 | 0.11341605  |
| Asn      | C00152 | MET              | 1768.7126  | 101.427315 | 0.05734528 | 1885.81077 | 1712.03812 | 1708.28891 | 6.99E-10   | *** | 1.08358825 | 0.06213867  |
| Asn      | C00152 | PER              | 1736.75667 | 21.0368937 | 0.01211275 | 1733.55027 | 1717.21269 | 1717.50705 | 6.99E-10   | *** | 1.06401069 | 0.01288809  |
| Asn      | C00152 | HK2-ASO1-DPI     | 1820.25531 | 117.148288 | 0.06435816 | 1718.91754 | 1793.32449 | 1948.52389 | 6.99E-10   | *** | 1.11516549 | 0.07177     |
| Asn      | C00152 | HK2-ASO1-DPI-PER | 1085.71491 | 122.001707 | 0.11236993 | 1193.58411 | 953.309978 | 1110.25065 | 6.99E-10   | *** | 0.66515494 | 0.07474341  |
| Asn      | C00152 | HK2-ASO1-MET     | 1019.59572 | 162.571669 | 0.15944719 | 954.259353 | 899.856834 | 1204.67099 | 6.99E-10   | *** | 0.62464752 | 0.09959829  |
| Asn      | C00152 | HK2-ASO1-MET-PER | 779.881356 | 42.635869  | 0.05466969 | 816.956112 | 789.395969 | 733.291988 | 6.99E-10   | *** | 0.47778835 | 0.02612054  |
| Asp      | C00049 | Ctrl             | 646.108464 | 46.9050829 | 0.0725963  | 592.239449 | 677.909561 | 668.176383 | 1.01E-12   | *** | 1          | 0.0725963   |
| Asp      | C00049 | HK2-ASO1         | 3403.32697 | 412.31129  | 0.12114948 | NA         | 3111.77886 | 3694.87508 | 1.01E-12   | *** | 5.26742359 | 0.63814562  |
| Asp      | C00049 | DPI              | 501.058856 | 50.3454622 | 0.10047814 | 443.689964 | 537.884141 | 521.602463 | 1.01E-12   | *** | 0.7755027  | 0.07792107  |
| Asp      | C00049 | MET              | 409.221971 | 24.6438414 | 0.06022121 | 437.655068 | 394.011354 | 395.999491 | 1.01E-12   | *** | 0.6333642  | 0.03814196  |
| Asp      | C00049 | PER              | 778.828302 | 64.6705801 | 0.08303573 | 720.587496 | 848.424504 | 767.472904 | 1.01E-12   | *** | 1.20541417 | 0.10009245  |
| Asp      | C00049 | HK2-ASO1-DPI     | 1335.59937 | 110.107905 | 0.08244082 | 1461.53067 | 1287.79059 | 1257.47684 | 1.01E-12   | *** | 2.0671442  | 0.17041706  |
| Asp      | C00049 | HK2-ASO1-DPI-PER | 1066.57646 | 67.3261808 | 0.06312363 | 1110.47691 | 989.062061 | 1100.19042 | 1.01E-12   | *** | 1.65076999 | 0.1042026   |
| Asp      | C00049 | HK2-ASO1-MET     | 790.168313 | 204.970604 | 0.25940119 | 1024.90995 | 698.974243 | 646.620749 | 1.01E-12   | *** | 1.22296543 | 0.31723869  |
| Asp      | C00049 | HK2-ASO1-MET-PER | 776.987585 | 52.1011722 | 0.06705535 | 806.395469 | 807.735975 | 716.831312 | 1.01E-12   | *** | 1.20256525 | 0.08063843  |
| ATP      | C00002 | Ctrl             | 413.831892 | 25.5048022 | 0.06163083 | 405.341922 | 442.4989   | 393.654853 | 9.45E-16   | *** | 1          | 0.06163083  |
| ATP      | C00002 | HK2-ASO1         | 365.546317 | 44.4101243 | 0.12148973 | 414.562155 | 327.986775 | 354.090021 | 9.45E-16   | *** | 0.8833208  | 0.10731441  |
| ATP      | C00002 | DPI              | 398.680505 | 20.03225   | 0.05024637 | 381.152446 | 420.516122 | 394.372947 | 9.45E-16   | *** | 0.96338758 | 0.04840673  |
| ATP      | C00002 | MET              | 281.9      |            |            |            |            |            |            |     |            |             |

|             |        |                  |            |            |            |             |            |            |            |     |             |            |
|-------------|--------|------------------|------------|------------|------------|-------------|------------|------------|------------|-----|-------------|------------|
| C           | D07769 | PER              | 4.27106095 | 1.42762602 | 0.33425559 | 5.91948288  | 3.43481213 | 3.45888785 | 1.48E-09   | *** | 1.02495056  | 0.34259546 |
| C           | D07769 | HK2-ASO1-DPI     | 41.5026878 | 7.05769507 | 0.17005393 | 33.6819157  | 43.4287093 | 47.3974384 | 1.48E-09   | *** | 9.95963884  | 1.69367485 |
| C           | D07769 | HK2-ASO1-DPI-PER | 71.8842933 | 14.8055595 | 0.20596376 | 70.4269844  | 57.8612774 | 87.3646182 | 1.48E-09   | *** | 17.25047389 | 3.55297354 |
| C           | D07769 | HK2-ASO1-MET     | 115.576357 | 28.3668328 | 0.24534802 | 106.362213  | 92.9620802 | 147.404779 | 1.48E-09   | *** | 27.7355096  | 6.80734869 |
| C           | D07769 | HK2-ASO1-MET-PER | 119.813752 | 9.60039456 | 0.08012765 | 120.572817  | 129.012081 | 109.856357 | 1.48E-09   | *** | 28.752381   | 2.30386078 |
| Carnitine   | C00318 | Ctrl             | 102.601026 | 5.06199173 | 0.04933666 | 108.030743  | 101.760303 | 98.012031  | 1.85E-14   | *** | 1           | 0.04933666 |
| Carnitine   | C00318 | HK2-ASO1         | 83.9812344 | 10.2729658 | 0.12232454 | 79.5387179  | 76.6771653 | 95.72782   | 1.85E-14   | *** | 0.81852237  | 0.10012537 |
| Carnitine   | C00318 | DPI              | 89.6574411 | 5.38923328 | 0.06010916 | 90.0374425  | 84.0882643 | 94.8466164 | 1.85E-14   | *** | 0.87384547  | 0.05252612 |
| Carnitine   | C00318 | MET              | 37.4174021 | 4.29434286 | 0.1147686  | 38.1146571  | 41.3204515 | 32.8170976 | 1.85E-14   | *** | 0.36468838  | 0.04185478 |
| Carnitine   | C00318 | PER              | 117.838162 | 13.2072203 | 0.11207931 | 103.402815  | 129.315675 | 120.795995 | 1.85E-14   | *** | 1.14850861  | 0.12872406 |
| Carnitine   | C00318 | HK2-ASO1-DPI     | 24.1291508 | 1.2781457  | 0.05297102 | 24.5445921  | 22.6949666 | 25.1478937 | 1.85E-14   | *** | 0.23517456  | 0.01245744 |
| Carnitine   | C00318 | HK2-ASO1-DPI-PER | 17.1798228 | 3.71814476 | 0.21642509 | 14.0473267  | 16.2033947 | 21.2887469 | 1.85E-14   | *** | 0.16744299  | 0.03623887 |
| Carnitine   | C00318 | HK2-ASO1-MET     | 7.55201059 | 4.6059427  | 0.60989622 | 5.60368184  | 12.8119327 | 4.24041721 | 1.85E-14   | *** | 0.07360561  | 0.04489178 |
| Carnitine   | C00318 | HK2-ASO1-MET-PER | 5.89781997 | 1.2324416  | 0.20896562 | 6.99841504  | 4.56622212 | 6.12882276 | 1.85E-14   | *** | 0.05748305  | 0.01201198 |
| CDP         | C00112 | Ctrl             | 32.1040698 | 3.74992687 | 0.11680534 | 28.8071178  | 31.3215927 | 36.1834987 | 9.07E-13   | *** | 1           | 0.11680534 |
| CDP         | C00112 | HK2-ASO1         | 41.0196539 | 3.70960775 | 0.09043489 | 44.2522676  | 36.9694518 | 41.8372422 | 9.07E-13   | *** | 1.27770884  | 0.11554945 |
| CDP         | C00112 | DPI              | 39.3264214 | 4.15770368 | 0.10572291 | 38.3436906  | 35.7481209 | 43.8874526 | 9.07E-13   | *** | 1.22496686  | 0.12950760 |
| CDP         | C00112 | MET              | 41.3629581 | 3.85409614 | 0.09317748 | 44.9636562  | 41.8276228 | 37.2975954 | 9.07E-13   | *** | 1.28840233  | 0.12005008 |
| CDP         | C00112 | PER              | 32.2995332 | 1.14241799 | 0.03536949 | 31.127734   | 32.3607578 | 33.4101078 | 9.07E-13   | *** | 1.00608843  | 0.03558483 |
| CDP         | C00112 | HK2-ASO1-DPI     | 25.1956053 | 0.2524437  | 0.01687712 | 25.5650516  | 24.7307664 | 25.2909979 | 9.07E-13   | *** | 0.78481032  | 0.01324581 |
| CDP         | C00112 | HK2-ASO1-DPI-PER | 11.703473  | 1.42551758 | 0.12180295 | 12.6639264  | 10.0655558 | 12.3809367 | 9.07E-13   | *** | 0.36454795  | 0.04403602 |
| CDP         | C00112 | HK2-ASO1-MET     | 8.45474002 | 0.33794415 | 0.03997097 | 8.77470673  | 8.48820492 | 8.10130842 | 9.07E-13   | *** | 0.26335415  | 0.01052532 |
| CDP         | C00112 | HK2-ASO1-MET-PER | 5.61614275 | 0.82676828 | 0.14721283 | 6.56061808  | 5.26440634 | 5.02340384 | 9.07E-13   | *** | 0.17493554  | 0.02575276 |
| CDP-choline | C00307 | Ctrl             | 0.1149305  | 0.00074304 | 0.00646514 | NA          | 0.11440509 | 0.11545591 | 1.17E-11   | *** | 1           | 0.00646514 |
| CDP-choline | C00307 | HK2-ASO1         | 2.31765768 | 1.23751947 | 0.53395265 | NA          | 1.44259928 | 3.19271609 | 1.17E-11   | *** | 20.1657317  | 10.7675459 |
| CDP-choline | C00307 | DPI              | 1.20709627 | 0.56672794 | 0.46949688 | 0.81035925  | 1.85616463 | 0.95476493 | 1.17E-11   | *** | 10.5028364  | 4.93104896 |
| CDP-choline | C00307 | MET              | 2.92342102 | 0.78041203 | 0.26695164 | 3.61460853  | 3.07856454 | 2.07709    | 1.17E-11   | *** | 25.4364242  | 6.79029514 |
| CDP-choline | C00307 | PER              | 0.96885601 | 0.33821277 | 0.34908466 | 1.05469343  | 1.25587946 | 0.59599514 | 1.17E-11   | *** | 8.4299293   | 2.94275899 |
| CDP-choline | C00307 | HK2-ASO1-DPI     | 35.7965001 | 2.19031132 | 0.06118786 | 38.0698057  | 35.6198083 | 33.6998864 | 1.17E-11   | *** | 311.462139  | 19.0577024 |
| CDP-choline | C00307 | HK2-ASO1-DPI-PER | 43.5983266 | 6.36264597 | 0.14593785 | 50.5180678  | 41.9661376 | 38.2107743 | 1.17E-11   | *** | 379.345131  | 55.3608122 |
| CDP-choline | C00307 | HK2-ASO1-MET     | 98.2758208 | 14.6745397 | 0.14931994 | 113.817546  | 96.3515985 | 84.658318  | 1.17E-11   | *** | 855.089106  | 127.681855 |
| CDP-choline | C00307 | HK2-ASO1-MET-PER | 33.5312012 | 5.331041   | 0.15898747 | 38.9197804  | 33.4141988 | 28.2596245 | 1.17E-11   | *** | 291.751976  | 46.3849098 |
| CDP-ETA     | C00570 | Ctrl             | 5.24293408 | 0.46375334 | 0.08845302 | 5.10566854  | 4.70743784 | 5.51069584 | 4.45E-08   | *** | 1           | 0.08845302 |
| CDP-ETA     | C00570 | HK2-ASO1         | 7.84362899 | 6.56247415 | 0.836663   | 0.50084252  | 9.89370112 | 13.1363433 | 4.45E-08   | *** | 1.49603807  | 1.2516797  |
| CDP-ETA     | C00570 | DPI              | 8.74977558 | 0.57978207 | 0.06626251 | 9.39458151  | 8.27143599 | 8.58330925 | 4.45E-08   | *** | 1.66887004  | 0.11058351 |
| CDP-ETA     | C00570 | MET              | 11.0046949 | 1.32064799 | 0.12000769 | 10.9785266  | 12.3382325 | 9.69732547 | 4.45E-08   | *** | 2.09895733  | 0.25189102 |
| CDP-ETA     | C00570 | PER              | 8.44852838 | 0.81882286 | 0.09691899 | 8.26378793  | 9.34393914 | 7.73785807 | 4.45E-08   | *** | 1.61141229  | 0.15617646 |
| CDP-ETA     | C00570 | HK2-ASO1-DPI     | 26.2899023 | 0.93165105 | 0.0354376  | 27.0120775  | 25.2382925 | 26.6193369 | 4.45E-08   | *** | 5.01434921  | 0.1776965  |
| CDP-ETA     | C00570 | HK2-ASO1-DPI-PER | 18.54616   | 1.82083837 | 0.09817873 | 20.4696376  | 18.3196952 | 16.8491472 | 4.45E-08   | *** | 3.53736281  | 0.34729377 |
| CDP-ETA     | C00570 | HK2-ASO1-MET     | 24.479661  | 3.91092465 | 0.15972221 | 27.6350577  | 25.6998074 | 20.1041179 | 4.45E-08   | *** | 4.66907663  | 0.74594198 |
| CDP-ETA     | C00570 | HK2-ASO1-MET-PER | 11.0941317 | 0.89625036 | 0.08078599 | 12.0164793  | 11.0394316 | 10.2264842 | 4.45E-08   | *** | 2.11601586  | 0.17094443 |
| Choline     | C00114 | Ctrl             | 899.220894 | 61.7743302 | 0.06869761 | 859.11718   | 970.359314 | 868.186187 | 3.41E-06   | *** | 1           | 0.06869761 |
| Choline     | C00114 | HK2-ASO1         | 1537.78885 | 82.818411  | 0.05385552 | NA          | 1479.22739 | 1596.35031 | 3.41E-06   | *** | 1.71013469  | 0.09210019 |
| Choline     | C00114 | DPI              | 2350.48069 | 552.3231   | 0.23498304 | 1745.34554  | 2478.63668 | 2827.45984 | 3.41E-06   | *** | 2.613908    | 0.61422405 |
| Choline     | C00114 | MET              | 3595.23078 | 530.099094 | 0.14744505 | 3926.98539  | 2983.86587 | 3874.84108 | 3.41E-06   | *** | 3.99816197  | 0.58950932 |
| Choline     | C00114 | PER              | 956.216595 | 51.9852852 | 0.0543656  | 898.023526  | 972.559897 | 998.066362 | 3.41E-06   | *** | 1.06338343  | 0.05781147 |
| Choline     | C00114 | HK2-ASO1-DPI     | 3370.72585 | 117.958516 | 0.03499499 | 3495.6026   | 3261.18588 | 3355.38907 | 3.41E-06   | *** | 3.74849592  | 0.13117858 |
| Choline     | C00114 | HK2-ASO1-DPI-PER | 2615.90616 | 415.296928 | 0.15875834 | 2736.4522   | 2153.67167 | 2957.59462 | 3.41E-06   | *** | 2.90908072  | 0.46184083 |
| Choline     | C00114 | HK2-ASO1-MET     | 2288.27288 | 686.585655 | 0.30004536 | 2626.68413  | 1498.17416 | 2739.96034 | 3.41E-06   | *** | 2.54472833  | 0.76353392 |
| Choline     | C00114 | HK2-ASO1-MET-PER | 2876.42222 | 614.602555 | 0.2136691  | 2512.74362  | 3586.03014 | 2530.49291 | 3.41E-06   | *** | 3.19879381  | 0.6834834  |
| Cit         | C00158 | Ctrl             | 2897.79302 | 280.726275 | 0.09687589 | 2984.44535  | 3124.97705 | 2583.95664 | 2.27E-11   | *** | 1           | 0.09687589 |
| Cit         | C00158 | HK2-ASO1         | 2139.43616 | 394.602117 | 0.18444211 | 2568.01308  | 1791.16188 | 2059.13353 | 2.27E-11   | *** | 0.73829847  | 0.13617333 |
| Cit         | C00158 | DPI              | 2373.1099  | 178.590289 | 0.0752558  | 2202.12784  | 2558.44251 | 2358.75934 | 2.27E-11   | *** | 0.81893699  | 0.0612976  |
| Cit         | C00158 | MET              | 1744.05852 | 53.6631357 | 0.03076911 | 1753.46591  | 1792.39592 | 1686.31373 | 2.27E-11   | *** | 0.60185752  | 0.01851862 |
| Cit         | C00158 | PER              | 2603.52649 | 155.131356 | 0.05958509 | 2747.19472  | 2624.34935 | 2439.03539 | 2.27E-11   | *** | 0.8984515   | 0.05353431 |
| Cit         | C00158 | HK2-ASO1-DPI     | 1151.01409 | 124.798906 | 0.10842518 | 1278.41156  | 1145.64357 | 1028.98714 | 2.27E-11   | *** | 0.39720369  | 0.04306688 |
| Cit         | C00158 | HK2-ASO1-DPI-PER | 253.494974 | 77.2329788 | 0.30467262 | 228.914829  | 340.026513 | 191.543579 | 2.27E-11   | *** | 0.08747863  | 0.02665234 |
| Cit         | C00158 | HK2-ASO1-MET     | 162.312155 | 26.1784473 | 0.16128458 | 188.887571  | 136.549611 | 161.499283 | 2.27E-11   | *** | 0.05601234  | 0.00903393 |
| Cit         | C00158 | HK2-ASO1-MET-PER | 349.577245 | 453.896512 | 1.29841549 | 873.689914  | 86.305878  | 88.7359445 | 2.27E-11   | *** | 0.12063568  | 0.15663524 |
| Citrulline  | C00327 | Ctrl             | 1.35136178 | 0.06871621 | 0.0508496  | 1.42878085  | 1.3277066  | 1.2975979  | 0.11843772 |     | 1           | 0.0508496  |
| Citrulline  | C00327 | HK2-ASO1         | 1.9173179  | 0.6602332  | 0.34435249 | 1.1893723   | 2.47745206 | 2.08512934 | 0.11843772 |     | 1.4188043   | 0.4885688  |
| Citrulline  | C00327 | DPI              | 3.24183083 | 0.87129642 | 0.26876678 | 4.0297407   | 2.30606783 | 3.38968397 | 0.11843772 |     | 2.3989363   | 0.64475438 |
| Citrulline  | C00327 | MET              | 3.10061672 | 0.940667   | 0.30338061 | 3.18792041  | 2.11934131 | 3.99458845 | 0.11843772 |     | 2.29443867  | 0.69608821 |
| Citrulline  | C00327 | PER              | 2.4562371  | 0.72107184 | 0.2935769  | NA          | 2.96611188 | 1.94636231 | 0.11843772 |     | 1.81760142  | 0.53358904 |
| Citrulline  | C00327 | HK2-ASO1-DPI     | 2.85438332 | 1.40655335 | 0.49276961 | 3.66683452  | 1.23023547 | 3.66607998 | 0.11843772 |     | 2.11222736  | 1.04084145 |
| Citrulline  | C00327 | HK2-ASO1-DPI-PER | 2.55423051 | 0.79620073 | 0.31171843 | 2.39129325  | 3.4192961  | 1.85210218 | 0.11843772 |     | 1.89011599  | 0.589184   |
| Citrulline  | C00327 | HK2-ASO1-MET     | 1.26960665 | 1.11638469 | 0.87931501 | 0.26673529  | 1.06961411 | 2.47247056 | 0.11843772 |     | 0.93950167  | 0.8261183  |
| Citrulline  | C00327 | HK2-ASO1-MET-PER | 1.9562681  | 0.76367435 | 0.39037345 | 2.74709858  | 1.89869731 | 1.22300841 | 0.11843772 |     | 1.44762722  | 0.56511466 |
| CMP         | C00055 | Ctrl             | 2.04842487 | 0.1305056  | 0.06371022 | 1.92684297  | 2.0321114  | 2.18632025 | 1.55E-08   | *** | 1           | 0.06371022 |
| CMP         | C00055 | HK2-ASO1         | 4.44117318 | 0.5467771  | 0.12311546 | 3.84597256  | 4.55638006 | 4.92116691 | 1.55E-08   | *** | 2.16809181  | 0.26692563 |
| CMP         | C00055 | DPI              | 6.22998852 | 0.37093663 | 0.0595403  | 5.965150384 | 6.07521361 | 6.6532481  | 1.55E-08   | *** | 3.04135563  | 0.18108384 |
| CMP         | C00055 | MET              | 8.44599818 | 0.6855186  | 0.0811649  | 8.73865934  | 8.93661173 | 7.66272346 | 1.55E-08   | *** | 4.12316717  | 0.33465645 |
| CMP         | C00055 | PER              | 2.87256395 | 0.1989537  | 0.28542284 | 3.81741542  | 2.45181198 | 2.34846444 | 1.55E-08   | *** | 1.40232819  | 0.4002565  |
| CMP         |        |                  |            |            |            |             |            |            |            |     |             |            |

|                     |        |                  |            |            |            |            |            |            |            |     |            |            |
|---------------------|--------|------------------|------------|------------|------------|------------|------------|------------|------------|-----|------------|------------|
| CoA                 | C00010 | HK2-ASO1-DPI-PER | 0.7337372  | 0.12931138 | 0.17623665 | 0.87932849 | 0.68964377 | 0.63223935 | 3.66E-05   | *** | 0.39375835 | 0.06939465 |
| CoA                 | C00010 | HK2-ASO1-MET     | 0.65004322 | 0.40897174 | 0.62914545 | 0.32574861 | 1.1094827  | 0.51489835 | 3.66E-05   | *** | 0.34884417 | 0.21947372 |
| CoA                 | C00010 | HK2-ASO1-MET-PER | 0.53500801 | 0.24221636 | 0.45273408 | 0.81016787 | 0.35402241 | 0.44083375 | 3.66E-05   | *** | 0.28711079 | 0.12998484 |
| Creatine            | C00300 | Ctrl             | 870.649823 | 46.7328509 | 0.05367583 | 849.288083 | 924.245917 | 838.41547  | 1.09E-14   | *** | 1          | 0.05367583 |
| Creatine            | C00300 | HK2-ASO1         | 718.224295 | 10.388543  | 0.0144642  | 727.251574 | 706.869383 | 720.551927 | 1.09E-14   | *** | 0.82492901 | 0.01193194 |
| Creatine            | C00300 | DPI              | 1172.13154 | 108.241361 | 0.09234575 | 1053.4503  | 1265.41718 | 1197.52715 | 1.09E-14   | *** | 1.34627207 | 0.1243225  |
| Creatine            | C00300 | MET              | 495.667595 | 33.6715806 | 0.06793178 | 524.889627 | 458.845546 | 503.267611 | 1.09E-14   | *** | 0.56930764 | 0.03867408 |
| Creatine            | C00300 | PER              | 1052.67312 | 80.4070796 | 0.07638371 | 992.932116 | 1144.09488 | 1020.99237 | 1.09E-14   | *** | 1.20906603 | 0.09235295 |
| Creatine            | C00300 | HK2-ASO1-DPI     | 611.481133 | 34.3631764 | 0.05619663 | 650.292016 | 599.225123 | 584.926259 | 1.09E-14   | *** | 0.70232729 | 0.03946842 |
| Creatine            | C00300 | HK2-ASO1-DPI-PER | 342.918685 | 38.4988953 | 0.11226829 | 341.717729 | 305.034319 | 382.004007 | 1.09E-14   | *** | 0.39386522 | 0.04421858 |
| Creatine            | C00300 | HK2-ASO1-MET     | 127.588492 | 53.3870072 | 0.41843121 | 188.544765 | 105.074156 | 89.1465551 | 1.09E-14   | *** | 0.14654398 | 0.06131858 |
| Creatine            | C00300 | HK2-ASO1-MET-PER | 118.913801 | 7.09053903 | 0.05962755 | 116.01807  | 126.993921 | 113.729412 | 1.09E-14   | *** | 0.13658051 | 0.00814396 |
| Creatine/P-Creatine | NA     | Ctrl             | 135.389438 | 10.581419  | 0.07815542 | 138.907115 | 143.764004 | 123.497195 | 3.09E-10   | *** | 1          | 0.07815542 |
| Creatine/P-Creatine | NA     | HK2-ASO1         | 167.413396 | 15.570194  | 0.09300447 | NA         | 156.403606 | 178.423186 | 3.09E-10   | *** | 1.23653217 | 0.11500302 |
| Creatine/P-Creatine | NA     | DPI              | 181.683216 | 13.9711941 | 0.07689865 | 188.175834 | 165.647118 | 191.226695 | 3.09E-10   | *** | 1.3419305  | 0.10319264 |
| Creatine/P-Creatine | NA     | MET              | 103.281427 | 9.29791808 | 0.09002507 | 112.380408 | 103.667287 | 93.7965858 | 3.09E-10   | *** | 0.762847   | 0.06867536 |
| Creatine/P-Creatine | NA     | PER              | 135.26196  | 3.49407912 | 0.02583194 | 132.561126 | 139.208087 | 134.016666 | 3.09E-10   | *** | 0.99905843 | 0.02580762 |
| Creatine/P-Creatine | NA     | HK2-ASO1-DPI     | 357.131401 | 79.5628253 | 0.22278306 | 362.775387 | 433.721953 | 274.896864 | 3.09E-10   | *** | 2.63780843 | 0.58765903 |
| Creatine/P-Creatine | NA     | HK2-ASO1-DPI-PER | 0          | 0          | NA         | 0          | 0          | 0          | 3.09E-10   | *** | 0          | 0          |
| Creatine/P-Creatine | NA     | HK2-ASO1-MET     | 0          | 0          | NA         | 0          | 0          | 0          | 3.09E-10   | *** | 0          | 0          |
| Creatine/P-Creatine | NA     | HK2-ASO1-MET-PER | 0          | 0          | NA         | 0          | 0          | 0          | 3.09E-10   | *** | 0          | 0          |
| Creatinine          | C00791 | Ctrl             | 50.303982  | 2.65496988 | 0.05277852 | 48.2405773 | 53.2992617 | 49.3721071 | 0.0165415  | *   | 1          | 0.05277852 |
| Creatinine          | C00791 | HK2-ASO1         | 66.8803576 | 37.2745173 | 0.55733131 | 109.921141 | 45.2711564 | 45.4487758 | 0.0165415  | *   | 1.32952412 | 0.74098542 |
| Creatinine          | C00791 | DPI              | 47.1124251 | 18.5597896 | 0.39394661 | 26.0628777 | 54.1510538 | 61.1233437 | 0.0165415  | *   | 0.93655459 | 0.36895269 |
| Creatinine          | C00791 | MET              | 45.78275   | 7.22850387 | 0.15788706 | 53.2282677 | 38.7928107 | 45.3271714 | 0.0165415  | *   | 0.91012179 | 0.14369645 |
| Creatinine          | C00791 | PER              | 37.0111573 | 7.11900012 | 0.19234741 | 29.5218797 | 37.8209702 | 43.690622  | 0.0165415  | *   | 0.73575005 | 0.14151961 |
| Creatinine          | C00791 | HK2-ASO1-DPI     | 24.0534278 | 5.69191541 | 0.23663635 | 30.4337432 | 22.2214754 | 19.5030648 | 0.0165415  | *   | 0.47816151 | 0.11315039 |
| Creatinine          | C00791 | HK2-ASO1-DPI-PER | 24.4554566 | 9.75391325 | 0.39884405 | 35.637839  | 17.7004067 | 20.0281241 | 0.0165415  | *   | 0.48615349 | 0.19389943 |
| Creatinine          | C00791 | HK2-ASO1-MET     | 23.1220835 | 9.61533065 | 0.41585053 | 31.8319608 | 12.8040826 | 24.7302069 | 0.0165415  | *   | 0.45964718 | 0.19114452 |
| Creatinine          | C00791 | HK2-ASO1-MET-PER | 20.6892801 | 1.37848006 | 0.06662774 | 19.4353538 | 22.1653363 | 20.4671503 | 0.0165415  | *   | 0.41128514 | 0.0274703  |
| CTP                 | C00063 | Ctrl             | 30.0301379 | 0.35910251 | 0.01195807 | 29.823259  | 30.4447933 | 29.8222944 | 1.98E-17   | *** | 1          | 0.01195807 |
| CTP                 | C00063 | HK2-ASO1         | 28.7742773 | 2.53565025 | 0.08812212 | 31.415868  | 26.3598544 | 28.5471094 | 1.98E-17   | *** | 0.95817999 | 0.08443685 |
| CTP                 | C00063 | DPI              | 23.7364252 | 1.46282175 | 0.06162772 | 24.7597164 | 24.3886111 | 22.0609481 | 1.98E-17   | *** | 0.79042012 | 0.04871179 |
| CTP                 | C00063 | MET              | 17.4548472 | 1.28113583 | 0.07339714 | 18.9259562 | 16.5844302 | 16.8541554 | 1.98E-17   | *** | 0.58124433 | 0.04266167 |
| CTP                 | C00063 | PER              | 31.2567101 | 1.63571009 | 0.05233149 | 32.2936546 | 32.1053906 | 29.3710849 | 1.98E-17   | *** | 1.04084471 | 0.0546895  |
| CTP                 | C00063 | HK2-ASO1-DPI     | 15.4280283 | 0.87420779 | 0.05666361 | 16.354748  | 14.6180675 | 15.3112692 | 1.98E-17   | *** | 0.5137515  | 0.02911101 |
| CTP                 | C00063 | HK2-ASO1-DPI-PER | 3.15176269 | 0.4154979  | 0.13183033 | 3.49313081 | 2.68912082 | 3.27303643 | 1.98E-17   | *** | 0.10495332 | 0.01383603 |
| CTP                 | C00063 | HK2-ASO1-MET     | 1.60196875 | 0.5050294  | 0.31525546 | 1.65114842 | 2.0806092  | 1.07414864 | 1.98E-17   | *** | 0.05334537 | 0.01681742 |
| CTP                 | C00063 | HK2-ASO1-MET-PER | 0.73149003 | 0.57051183 | 0.77993111 | 1.38630096 | 0.34162875 | 0.46654037 | 1.98E-17   | *** | 0.02435853 | 0.01899798 |
| Cys                 | C00097 | Ctrl             | 0.16386183 | 0.01934802 | 0.11807524 | 0.17754295 | 0.15018071 | NA         | 0.00488136 | **  | 1          | 0.11807524 |
| Cys                 | C00097 | HK2-ASO1         | 0.49286853 | 0.18426539 | 0.37386316 | NA         | 0.36257323 | 0.62316384 | 0.00488136 | **  | 3.00783005 | 1.12451685 |
| Cys                 | C00097 | DPI              | 0.50611531 | 0.43667098 | 0.8627895  | 0.16428354 | 0.35602525 | 0.99803715 | 0.00488136 | **  | 3.08867121 | 2.66487308 |
| Cys                 | C00097 | MET              | 0.83291007 | 0.09483342 | 0.11385793 | 0.89996742 | 0.76585272 | NA         | 0.00488136 | **  | 5.08300242 | 0.57874014 |
| Cys                 | C00097 | PER              | 0.29550338 | 0.23844941 | 0.80692616 | 0.46411257 | 0.12689419 | NA         | 0.00488136 | **  | 1.80336923 | 1.4551858  |
| Cys                 | C00097 | HK2-ASO1-DPI     | 1.54595475 | 0.85980295 | 0.55616716 | 2.53488436 | 0.97542666 | 1.12755322 | 0.00488136 | **  | 9.43450198 | 5.24716013 |
| Cys                 | C00097 | HK2-ASO1-DPI-PER | 2.65672806 | 0.43794896 | 0.16484524 | 2.37056283 | 3.1608943  | 2.43872703 | 0.00488136 | **  | 16.2132211 | 2.67267225 |
| Cys                 | C00097 | HK2-ASO1-MET     | 8.54434309 | 5.37188314 | 0.6287064  | 5.5569906  | 5.33016182 | 14.7458768 | 0.00488136 | **  | 52.1435844 | 32.783005  |
| Cys                 | C00097 | HK2-ASO1-MET-PER | 5.1348034  | 1.45279023 | 0.28293006 | 3.70350581 | 6.60817236 | 5.09273202 | 0.00488136 | **  | 31.3361778 | 8.86594664 |
| Cys Sulfinic Acid   | C00606 | Ctrl             | 0          | 0          | NA         | 0          | 0          | 0          | 6.44E-07   | *** | NA         | NA         |
| Cys Sulfinic Acid   | C00606 | HK2-ASO1         | 0          | 0          | NA         | 0          | 0          | 0          | 6.44E-07   | *** | NA         | NA         |
| Cys Sulfinic Acid   | C00606 | DPI              | 0.26957288 | 0.09201125 | 0.34132234 | NA         | 0.33463465 | 0.2045111  | 6.44E-07   | *** | Inf        | Inf        |
| Cys Sulfinic Acid   | C00606 | MET              | 0          | 0          | NA         | 0          | 0          | 0          | 6.44E-07   | *** | NA         | NA         |
| Cys Sulfinic Acid   | C00606 | PER              | 0.11277244 | 0.00598405 | 0.0530631  | 0.10854107 | 0.1170038  | NA         | 6.44E-07   | *** | Inf        | Inf        |
| Cys Sulfinic Acid   | C00606 | HK2-ASO1-DPI     | 0.23193118 | 0.10056313 | 0.4335904  | 0.30304005 | 0.16082231 | NA         | 6.44E-07   | *** | Inf        | Inf        |
| Cys Sulfinic Acid   | C00606 | HK2-ASO1-DPI-PER | 0          | 0          | NA         | 0          | 0          | 0          | 6.44E-07   | *** | NA         | NA         |
| Cys Sulfinic Acid   | C00606 | HK2-ASO1-MET     | 0          | 0          | NA         | 0          | 0          | 0          | 6.44E-07   | *** | NA         | NA         |
| Cys Sulfinic Acid   | C00606 | HK2-ASO1-MET-PER | 0          | 0          | NA         | 0          | 0          | 0          | 6.44E-07   | *** | NA         | NA         |
| Cytosine            | C00380 | Ctrl             | 31.2644031 | 2.48908328 | 0.07961397 | 29.7872967 | 34.1381736 | 29.8677389 | 1.67E-11   | *** | 1          | 0.07961397 |
| Cytosine            | C00380 | HK2-ASO1         | 22.8472575 | 6.46441582 | 0.28294056 | 29.8938457 | 17.1913903 | 21.4565366 | 1.67E-11   | *** | 0.73077543 | 0.20676601 |
| Cytosine            | C00380 | DPI              | 25.6255973 | 3.15716868 | 0.12320371 | 21.9857562 | 27.2683683 | 27.6226673 | 1.67E-11   | *** | 0.81964134 | 0.10098285 |
| Cytosine            | C00380 | MET              | 14.5914794 | 2.63047364 | 0.18027464 | 17.2297888 | 14.5757371 | 11.9689122 | 1.67E-11   | *** | 0.46671223 | 0.08413638 |
| Cytosine            | C00380 | PER              | 40.7699934 | 4.05204374 | 0.09938789 | 40.3317741 | 45.0233355 | 36.9548706 | 1.67E-11   | *** | 1.30403876 | 0.12960566 |
| Cytosine            | C00380 | HK2-ASO1-DPI     | 2.77039573 | 0.90927551 | 0.32821142 | 3.71021192 | 2.70587772 | 1.89509756 | 1.67E-11   | *** | 0.08861182 | 0.02908341 |
| Cytosine            | C00380 | HK2-ASO1-DPI-PER | 0.21222761 | 0.18595112 | 0.87618722 | 0.07517043 | 0.1376153  | 0.42389709 | 1.67E-11   | *** | 0.00678815 | 0.00594761 |
| Cytosine            | C00380 | HK2-ASO1-MET     | 0.79449411 | 0.78681896 | 0.99033957 | 1.35085913 | NA         | 0.23812909 | 1.67E-11   | *** | 0.0254121  | 0.02516669 |
| Cytosine            | C00380 | HK2-ASO1-MET-PER | 0.14165718 | 0.06150013 | 0.43414768 | 0.13397164 | 0.20663885 | 0.08436104 | 1.67E-11   | *** | 0.00453094 | 0.0019671  |
| dA                  | C00559 | Ctrl             | 0.12707918 | 0.11753483 | 0.92489447 | 0.0439695  | NA         | 0.21018885 | 9.17E-05   | *** | 1          | 0.92489447 |
| dA                  | C00559 | HK2-ASO1         | 0.37751076 | 0.08016703 | 0.21235694 | 0.4527533  | 0.38658718 | 0.29319181 | 9.17E-05   | *** | 2.97067363 | 0.63084315 |
| dA                  | C00559 | DPI              | 0.10403554 | 0.05633067 | 0.54145597 | NA         | 0.14386734 | 0.06420375 | 9.17E-05   | *** | 0.81866711 | 0.44327219 |
| dA                  | C00559 | MET              | 0.09101731 | 0.05411614 | 0.59456978 | 0.05569908 | 0.15331973 | 0.06403313 | 9.17E-05   | *** | 0.71622523 | 0.42584588 |
| dA                  | C00559 | PER              | 0.22676058 | 0.04207576 | 0.18555147 | 0.27101376 | 0.18726703 | 0.22200094 | 9.17E-05   | *** | 1.7844039  | 0.33109876 |
| dA                  | C00559 | HK2-ASO1-DPI     | 0.12900761 | 0.08415158 | 0.65229935 | 0.08654564 | 0.07454695 | 0.22593023 | 9.17E-05   | *** | 1.01517502 | 0.662198   |
| dA                  | C00559 | HK2-ASO1-DPI-PER | 0          | 0          | NA         | 0          | 0          | 0          | 9.17E-05   | *** | 0          | 0          |
| dA                  | C00559 | HK2-ASO1-MET     | 0          | 0          | NA         | 0          | 0          | 0          | 9.17E-05   | *** | 0          | 0          |
| dA                  | C00559 | HK2-ASO1-MET-PER | 0.20646794 | NA         | NA         | NA         | NA         | 0.20646794 | 9.17E-05   | *** | 1.62471892 | NA         |
| dATP                | C00131 | Ctrl             | 0.10818718 | 0.01128152 | 0.10427782 | NA         | 0.11616442 | 0.10020994 | 4.23E-07   | *** | 1          | 0.10427782 |
| dATP                | C00131 | HK2-ASO1         | 0          | 0          | NA         | 0          | 0          | 0          | 4.23E-07   | *** | 0          | 0          |
| dATP                | C00131 | DPI              | 0          | 0          | NA         | 0          | 0          | 0          | 4.23E-07   | *** | 0          | 0          |
| dATP                | C00131 | MET              | 0          | 0          | NA         | 0          | 0          | 0          | 4.23E-07   | *** | 0          | 0          |
| dATP                | C00131 | PER              | 0.15230878 | 0.07406689 | 0.4862943  | 0.20468198 | 0.09993558 | NA         | 4.23E-07   | *** | 1.4078265  | 0.6        |

|        |        |                  |            |            |             |            |            |            |            |     |            |            |
|--------|--------|------------------|------------|------------|-------------|------------|------------|------------|------------|-----|------------|------------|
| dATP   | C00131 | HK2-ASO1-MET-PER | 0          | 0          | NA          | 0          | 0          | 0          | 4.23E-07   | *** | 0          | 0          |
| dC     | C00881 | Ctrl             | 61.6591089 | 7.02809014 | 0.113983    | 53.5616924 | 65.240981  | 66.1746532 | 7.32E-14   | *** | 1          | 0.113983   |
| dC     | C00881 | HK2-ASO1         | 29.5980669 | 5.36799223 | 0.18136293  | 26.8995841 | 26.1147124 | 35.7799043 | 7.32E-14   | *** | 0.48002748 | 0.08705919 |
| dC     | C00881 | DPI              | 1.9554222  | 2.78475864 | 1.42412142  | 5.1583117  | 0.10698749 | 6.60096723 | 7.32E-14   | *** | 0.03171344 | 0.04516378 |
| dC     | C00881 | MET              | 0.2865888  | 0.27689136 | 0.96616253  | 0.09079704 | 0.48238055 | NA         | 7.32E-14   | *** | 0.00464796 | 0.0049068  |
| dC     | C00881 | PER              | 0.73849231 | 0.18334661 | 0.24827153  | 0.87628504 | 0.80879313 | 0.53039877 | 7.32E-14   | *** | 0.01197702 | 0.00297355 |
| dC     | C00881 | HK2-ASO1-DPI     | 0          | 0          | NA          | 0          | 0          | 0          | 7.32E-14   | *** | 0          | 0          |
| dC     | C00881 | HK2-ASO1-DPI-PER | 0          | 0          | NA          | 0          | 0          | 0          | 7.32E-14   | *** | 0          | 0          |
| dC     | C00881 | HK2-ASO1-MET     | 0          | 0          | NA          | 0          | 0          | 0          | 7.32E-14   | *** | 0          | 0          |
| dC     | C00881 | HK2-ASO1-MET-PER | 0          | 0          | NA          | 0          | 0          | 0          | 7.32E-14   | *** | 0          | 0          |
| dCDP   | C00705 | Ctrl             | 0.06514226 | 0.01755234 | 0.26944632  | 0.07755364 | NA         | 0.05273088 | 0.00010927 | *** | 1          | 0.26944632 |
| dCDP   | C00705 | HK2-ASO1         | 0          | 0          | NA          | 0          | 0          | 0          | 0.00010927 | *** | 0          | 0          |
| dCDP   | C00705 | DPI              | 0.18985515 | 0.1060588  | 0.5586301   | 0.2964083  | 0.18885945 | 0.08429771 | 0.00010927 | *** | 2.91446993 | 1.62811062 |
| dCDP   | C00705 | MET              | 0.10936606 | 0.04170036 | 0.38129159  | 0.06327658 | 0.12033852 | 0.14448308 | 0.00010927 | *** | 1.67888038 | 0.64014297 |
| dCDP   | C00705 | PER              | 0.074451   | 0.01573786 | 0.21138544  | 0.06088512 | 0.09170559 | 0.07076231 | 0.00010927 | *** | 1.14289872 | 0.24159215 |
| dCDP   | C00705 | HK2-ASO1-DPI     | 0          | 0          | NA          | 0          | 0          | 0          | 0.00010927 | *** | 0          | 0          |
| dCDP   | C00705 | HK2-ASO1-DPI-PER | 0          | 0          | NA          | 0          | 0          | 0          | 0.00010927 | *** | 0          | 0          |
| dCDP   | C00705 | HK2-ASO1-MET     | 0          | 0          | NA          | 0          | 0          | 0          | 0.00010927 | *** | 0          | 0          |
| dCDP   | C00705 | HK2-ASO1-MET-PER | 0          | 0          | NA          | 0          | 0          | 0          | 0.00010927 | *** | 0          | 0          |
| dG     | C00330 | Ctrl             | 9.63152109 | 7.37018926 | 0.7652155   | 6.70477213 | 4.17425288 | 18.0155382 | 0.07916051 |     | 1          | 0.7652155  |
| dG     | C00330 | HK2-ASO1         | 3.72690353 | 1.82690308 | 0.49019328  | 2.06579086 | 3.43135889 | 5.68356083 | 0.07916051 |     | 0.38694859 | 0.1896796  |
| dG     | C00330 | DPI              | 4.4318599  | 1.8802753  | 0.42426325  | 6.5794104  | 3.08157913 | 3.63459015 | 0.07916051 |     | 0.46014122 | 0.19522101 |
| dG     | C00330 | MET              | 5.67396229 | 1.21150817 | 0.21352066  | 6.35691635 | 6.38980847 | 4.27516205 | 0.07916051 |     | 0.58910345 | 0.12578576 |
| dG     | C00330 | PER              | 11.8231236 | 12.014377  | 0.101617621 | 5.71958893 | 4.08575744 | 25.6640245 | 0.07916051 |     | 1.2275448  | 0.24740183 |
| dG     | C00330 | HK2-ASO1-DPI     | 12.2639009 | 4.85710866 | 0.39604924  | 7.24139274 | 16.9367085 | 12.6136014 | 0.07916051 |     | 1.27330883 | 0.504083   |
| dG     | C00330 | HK2-ASO1-DPI-PER | 1.3606531  | 0.43272038 | 0.31802403  | 1.56907779 | 1.6497171  | 0.86316439 | 0.07916051 |     | 0.14127084 | 0.04492752 |
| dG     | C00330 | HK2-ASO1-MET     | 1.18741801 | 0.968483   | 0.81562094  | NA         | 0.50259712 | 1.8722389  | 0.07916051 |     | 0.12328458 | 0.10055348 |
| dG     | C00330 | HK2-ASO1-MET-PER | 0.45946651 | 0.29737649 | 0.64722126  | 0.80275039 | 0.29488944 | 0.2807597  | 0.07916051 |     | 0.04770446 | 0.03087534 |
| DMG    | C01026 | Ctrl             | 8.74516233 | 4.24803186 | 0.48575792  | 13.1776942 | 8.3483113  | 4.70948148 | 0.43196269 |     | 1          | 0.48575792 |
| DMG    | C01026 | HK2-ASO1         | 14.7390108 | 6.31014495 | 0.4281254   | 22.0238767 | 10.9701833 | 11.2229723 | 0.43196269 |     | 1.68539019 | 0.72155836 |
| DMG    | C01026 | DPI              | 10.3481794 | 4.22883041 | 0.40865453  | 5.56209768 | 13.5797147 | 11.9027257 | 0.43196269 |     | 1.18330329 | 0.48356225 |
| DMG    | C01026 | MET              | 7.98060928 | 3.72330661 | 0.46654416  | 6.93158843 | 4.89434712 | 12.1158923 | 0.43196269 |     | 0.91257417 | 0.42575615 |
| DMG    | C01026 | PER              | 7.34878996 | 2.22592371 | 0.30289663  | 4.79753868 | 8.35409346 | 8.89473773 | 0.43196269 |     | 0.84032631 | 0.25453201 |
| DMG    | C01026 | HK2-ASO1-DPI     | 20.0837018 | 8.5868486  | 0.42755308  | 29.9987338 | 15.0707517 | 15.1816197 | 0.43196269 |     | 2.29654991 | 0.98189699 |
| DMG    | C01026 | HK2-ASO1-DPI-PER | 17.3979697 | 16.1559179 | 0.92860938  | 7.65320447 | 36.046903  | 8.49380182 | 0.43196269 |     | 1.98943931 | 1.84741201 |
| DMG    | C01026 | HK2-ASO1-MET     | 11.031185  | 6.34715414 | 0.5753828   | 18.2725248 | 6.43142663 | 8.38960357 | 0.43196269 |     | 1.26140426 | 0.72579032 |
| DMG    | C01026 | HK2-ASO1-MET-PER | 12.8953223 | 6.44996778 | 0.36059337  | 8.07778012 | 13.2508847 | 17.3573021 | 0.43196269 |     | 1.47456637 | 0.53171886 |
| dTMP   | C00364 | Ctrl             | 0.06620691 | 0.01513795 | 0.22864611  | 0.0543344  | 0.06103281 | 0.08325354 | 0.00204374 | **  | 1          | 0.22864611 |
| dTMP   | C00364 | HK2-ASO1         | 0.23403962 | 0.11661317 | 0.49826251  | NA         | 0.31649758 | 0.15158166 | 0.00204374 | **  | 3.53497244 | 1.76134425 |
| dTMP   | C00364 | DPI              | 0          | 0          | NA          | 0          | 0          | 0          | 0.00204374 | **  | 0          | 0          |
| dTMP   | C00364 | MET              | 0.13344325 | 0.00916678 | 0.06869424  | 0.13992514 | NA         | 0.12696135 | 0.00204374 | **  | 2.01554853 | 0.13845657 |
| dTMP   | C00364 | PER              | 0.15541162 | 0.04505005 | 0.28987572  | 0.16564232 | 0.19446647 | 0.10612606 | 0.00204374 | **  | 2.34736234 | 0.68044335 |
| dTMP   | C00364 | HK2-ASO1-DPI     | 0.50724539 | 0.13892247 | 0.27387625  | 0.40901237 | 0.6054784  | NA         | 0.00204374 | **  | 7.66151629 | 2.0983075  |
| dTMP   | C00364 | HK2-ASO1-DPI-PER | 0          | 0          | NA          | 0          | 0          | 0          | 0.00204374 | **  | 0          | 0          |
| dTMP   | C00364 | HK2-ASO1-MET     | 0.30847431 | 0.25150764 | 0.81532765  | 0.56520849 | 0.06254123 | 0.29767321 | 0.00204374 | **  | 4.65924615 | 3.79881223 |
| dTMP   | C00364 | HK2-ASO1-MET-PER | 0.27681798 | 0.08545333 | 0.30869861  | 0.25613071 | 0.37071579 | 0.20360745 | 0.00204374 | **  | 4.18110386 | 1.29070096 |
| dTTP   | C00459 | Ctrl             | 0.24940427 | 0.13116489 | 0.52591278  | 0.13364509 | 0.3918657  | 0.22270202 | 2.48E-05   | *** | 1          | 0.52591278 |
| dTTP   | C00459 | HK2-ASO1         | 0          | 0          | NA          | 0          | 0          | 0          | 2.48E-05   | *** | 0          | 0          |
| dTTP   | C00459 | DPI              | 0          | 0          | NA          | 0          | 0          | 0          | 2.48E-05   | *** | 0          | 0          |
| dTTP   | C00459 | MET              | 0          | 0          | NA          | 0          | 0          | 0          | 2.48E-05   | *** | 0          | 0          |
| dTTP   | C00459 | PER              | 0.16558593 | 0.07669128 | 0.46315092  | 0.21260724 | 0.07708836 | 0.20706219 | 2.48E-05   | *** | 0.66392528 | 0.30749785 |
| dTTP   | C00459 | HK2-ASO1-DPI     | 0          | 0          | NA          | 0          | 0          | 0          | 2.48E-05   | *** | 0          | 0          |
| dTTP   | C00459 | HK2-ASO1-DPI-PER | 0          | 0          | NA          | 0          | 0          | 0          | 2.48E-05   | *** | 0          | 0          |
| dTTP   | C00459 | HK2-ASO1-MET     | 0          | 0          | NA          | 0          | 0          | 0          | 2.48E-05   | *** | 0          | 0          |
| dTTP   | C00459 | HK2-ASO1-MET-PER | 0          | 0          | NA          | 0          | 0          | 0          | 2.48E-05   | *** | 0          | 0          |
| F16BP  | C00354 | Ctrl             | 3.78138412 | 0.4807543  | 0.12713712  | 3.44595673 | 3.56602988 | 4.33216576 | 0.00953012 | **  | 1          | 0.12713712 |
| F16BP  | C00354 | HK2-ASO1         | 4.11557242 | 0.42787322 | 0.10396445  | 4.4408646  | 3.63087937 | 4.27497328 | 0.00953012 | **  | 1.08837724 | 0.11315254 |
| F16BP  | C00354 | DPI              | 4.75543737 | 0.4677337  | 0.09835766  | 4.37659234 | 4.61149501 | 5.27822476 | 0.00953012 | **  | 1.25759172 | 0.12369378 |
| F16BP  | C00354 | MET              | 4.24887104 | 0.69429672 | 0.16340734  | 5.04625878 | 3.92213218 | 3.77822217 | 0.00953012 | **  | 1.12362852 | 0.18360915 |
| F16BP  | C00354 | PER              | 4.60291305 | 0.12459909 | 0.02706962  | 4.4623766  | 4.69986575 | 4.6464968  | 0.00953012 | **  | 1.21725614 | 0.32295066 |
| F16BP  | C00354 | HK2-ASO1-DPI     | 4.63610096 | 1.07628664 | 0.23215341  | 5.85672042 | 3.8234079  | 4.22817455 | 0.00953012 | **  | 1.2260328  | 0.28462769 |
| F16BP  | C00354 | HK2-ASO1-DPI-PER | 3.58805088 | 0.38003878 | 0.10591789  | 4.01649172 | 3.29162151 | 3.4560394  | 0.00953012 | **  | 0.94887236 | 0.10050256 |
| F16BP  | C00354 | HK2-ASO1-MET     | 3.32972328 | 0.66559619 | 0.19989535  | 4.06201043 | 2.76150314 | 3.16565626 | 0.00953012 | **  | 0.88055674 | 0.1760192  |
| F16BP  | C00354 | HK2-ASO1-MET-PER | 2.81519082 | 0.51317942 | 0.18228939  | 3.30816823 | 2.85345301 | 2.28395122 | 0.00953012 | **  | 0.74448687 | 0.13571206 |
| Folate | C00504 | Ctrl             | 1.64694447 | 0.67264645 | 0.40842085  | 0.95655591 | 1.68395704 | 2.30032048 | 0.0125283  | *   | 1          | 0.40842085 |
| Folate | C00504 | HK2-ASO1         | 1.68380614 | 0.41025183 | 0.24364553  | 1.85361947 | 1.9818866  | 1.21591234 | 0.0125283  | *   | 1.02238185 | 0.24909876 |
| Folate | C00504 | DPI              | 1.55513968 | 0.56803404 | 0.36526229  | 1.04535399 | 1.45260899 | 2.16745607 | 0.0125283  | *   | 0.94425751 | 0.34490176 |
| Folate | C00504 | MET              | 1.69084579 | 0.2352982  | 0.13916006  | 1.43437066 | 1.89674044 | 1.74142628 | 0.0125283  | *   | 1.02665622 | 0.14286954 |
| Folate | C00504 | PER              | 1.29814153 | 0.38956798 | 0.30009669  | 1.54465009 | 0.8490217  | 1.50075282 | 0.0125283  | *   | 0.78821208 | 0.23653984 |
| Folate | C00504 | HK2-ASO1-DPI     | 1.9619634  | 0.54532085 | 0.2779465   | 1.56028463 | 1.7428439  | 2.58276166 | 0.0125283  | *   | 1.19127477 | 0.33111065 |
| Folate | C00504 | HK2-ASO1-DPI-PER | 2.15586803 | 0.86259776 | 0.40011622  | 3.11133093 | 1.43443005 | 1.9218431  | 0.0125283  | *   | 1.30901075 | 0.52375643 |
| Folate | C00504 | HK2-ASO1-MET     | 4.08825585 | 1.79431399 | 0.43889474  | 3.32845    | 2.79885234 | 6.13746521 | 0.0125283  | *   | 2.48232768 | 1.08948056 |
| Folate | C00504 | HK2-ASO1-MET-PER | 2.65264187 | 0.31968213 | 0.12051462  | 2.53697677 | 2.40689108 | 3.01405777 | 0.0125283  | *   | 1.61064439 | 0.1941062  |
| Fru    | C00095 | Ctrl             | 0.77859218 | 0.27423459 | 0.35221853  | 0.95346372 | 0.91978178 | 0.46253102 | 0.02879284 | *   | 1          | 0.35221853 |
| Fru    | C00095 | HK2-ASO1         | 1.5398928  | 0.53730095 | 0.34892101  | 2.15574898 | 1.29702768 | 1.16690175 | 0.02879284 | *   | 1.97779127 | 0.69009292 |
| Fru    | C00095 | DPI              | 1.26761131 | 0.38000968 | 0.29978407  | 0.96262273 | 1.69331582 | 1.14689537 | 0.02879284 | *   | 1.62808123 | 0.48807282 |
| Fru    | C00095 | MET              | 0.37572248 | 0.03346487 | 0.08906804  | 0.39938572 | NA         | 0.35205925 | 0.02879284 | *   | 0.48256648 | 0.04298125 |
| Fru    | C00095 | PER              | 0.9120499  | 0.37549628 | 0.41170585  | 0.87442669 | 0.55678152 | 1.30494147 | 0.02879284 | *   | 1.17140902 | 0.48227595 |
| Fru    | C00095 | HK2-ASO1-DPI     | 0          | 0          | NA          | 0          | 0          | 0          | 0.02879284 | *   | 0          | 0          |
| Fru    | C00095 | HK2-ASO1-DPI-PER | 1.58952862 | 0.56987529 | 0.35851842  | NA         | 1.18656594 | 1.99249131 | 0.02879284 | *   | 2.041542   | 0.73193041 |
| Fru    | C00095 | HK2-ASO1-MET     | 2.04392066 | 1.66256849 | 0.81342124  | NA         | 0.86830721 | 3.21953411 | 0.02879284 | *   | 2.62514924 | 2.13535216 |
| Fru    | C00095 | HK2-ASO1-MET-PER | 0.8513796  | 0.12099772 | 0.14211959  | 0.76582129 | 0.93693791 | NA         | 0.02879284 | *   | 1.09348595 | 0.15540577 |

|         |        |                  |            |            |            |            |            |            |           |     |             |            |
|---------|--------|------------------|------------|------------|------------|------------|------------|------------|-----------|-----|-------------|------------|
| Fum     | C00122 | HK2-ASO1         | 80.059791  | 4.46112702 | 0.05572244 | 85.0493888 | 76.4561234 | 78.6738609 | 1.15E-15  | *** | 0.63435992  | 0.03534808 |
| Fum     | C00122 | DPI              | 210.638663 | 3.90126102 | 0.01852111 | 214.168211 | 211.298051 | 206.449728 | 1.15E-15  | *** | 1.66901168  | 0.03091194 |
| Fum     | C00122 | MET              | 210.236491 | 8.22357526 | 0.03911583 | 217.914186 | 211.236748 | 201.558538 | 1.15E-15  | *** | 1.66582504  | 0.06516013 |
| Fum     | C00122 | PER              | 146.727195 | 16.2334826 | 0.11063718 | 158.58354  | 153.372658 | 128.225389 | 1.15E-15  | *** | 1.16260424  | 0.12862725 |
| Fum     | C00122 | HK2-ASO1-DPI     | 85.0762893 | 2.97963329 | 0.03502308 | 88.2523183 | 84.634069  | 82.3424806 | 1.15E-15  | *** | 0.674110854 | 0.02360935 |
| Fum     | C00122 | HK2-ASO1-DPI-PER | 78.1633851 | 5.89598448 | 0.07543154 | 83.168748  | 71.6641564 | 79.657251  | 1.15E-15  | *** | 0.61933361  | 0.04671729 |
| Fum     | C00122 | HK2-ASO1-MET     | 69.2610456 | 6.05544299 | 0.08742927 | 74.7309652 | 62.7540341 | 70.2981377 | 1.15E-15  | *** | 0.54879523  | 0.04798077 |
| Fum     | C00122 | HK2-ASO1-MET-PER | 81.2630696 | 4.76659391 | 0.05865634 | 80.9873311 | 86.1615475 | 76.6403304 | 1.15E-15  | *** | 0.6438942   | 0.03776847 |
| G       | C00387 | Ctrl             | 0          | 0          | 0          | 0          | 0          | 0          | 0.0001822 | *** | NA          | NA         |
| G       | C00387 | HK2-ASO1         | 0          | 0          | 0          | 0          | 0          | 0          | 0.0001822 | *** | NA          | NA         |
| G       | C00387 | DPI              | 0          | 0          | 0          | 0          | 0          | 0          | 0.0001822 | *** | NA          | NA         |
| G       | C00387 | MET              | 0          | 0          | 0          | 0          | 0          | 0          | 0.0001822 | *** | NA          | NA         |
| G       | C00387 | PER              | 0          | 0          | 0          | 0          | 0          | 0          | 0.0001822 | *** | NA          | NA         |
| G       | C00387 | HK2-ASO1-DPI     | 0          | 0          | 0          | 0          | 0          | 0          | 0.0001822 | *** | NA          | NA         |
| G       | C00387 | HK2-ASO1-DPI-PER | 1.00965824 | 0.59116656 | 0.58551155 | 0.56164785 | 0.78763326 | 1.6796936  | 0.0001822 | *** | Inf         | Inf        |
| G       | C00387 | HK2-ASO1-MET     | 0.53850495 | 0.35678914 | 0.662555   | 0.20706605 | 0.49230533 | 0.91614345 | 0.0001822 | *** | Inf         | Inf        |
| G       | C00387 | HK2-ASO1-MET-PER | 1.07659574 | 0.52564049 | 0.48824315 | 0.49172707 | 1.2285153  | 1.50954486 | 0.0001822 | *** | Inf         | Inf        |
| G3P     | C00118 | Ctrl             | 5.37229135 | 0.80571968 | 0.14997691 | 6.11307337 | 5.48935875 | 4.51444194 | 8.16E-13  | *** | 1           | 0.14997691 |
| G3P     | C00118 | HK2-ASO1         | 1.2677104  | 0.24772161 | 0.19540868 | 1.53742852 | 1.05035833 | 1.21534434 | 8.16E-13  | *** | 0.23597201  | 0.04611098 |
| G3P     | C00118 | DPI              | 3.22245936 | 0.548435   | 0.17019144 | 2.7259618  | 3.13026933 | 3.81114694 | 8.16E-13  | *** | 0.5998296   | 0.10208586 |
| G3P     | C00118 | MET              | 2.61606845 | 0.21237729 | 0.08118185 | 2.77257527 | 2.37431176 | 2.70131832 | 8.16E-13  | *** | 0.4869558   | 0.03953198 |
| G3P     | C00118 | PER              | 1.45028555 | 0.18666137 | 0.12870664 | 1.25049278 | 1.48014905 | 1.62021482 | 8.16E-13  | *** | 0.26995661  | 0.03474521 |
| G3P     | C00118 | HK2-ASO1-DPI     | 0          | 0          | 0          | 0          | 0          | 0          | 8.16E-13  | *** | 0           | 0          |
| G3P     | C00118 | HK2-ASO1-DPI-PER | 0          | 0          | 0          | 0          | 0          | 0          | 8.16E-13  | *** | 0           | 0          |
| G3P     | C00118 | HK2-ASO1-MET     | 0          | 0          | 0          | 0          | 0          | 0          | 8.16E-13  | *** | 0           | 0          |
| G3P     | C00118 | HK2-ASO1-MET-PER | 0          | 0          | 0          | 0          | 0          | 0          | 8.16E-13  | *** | 0           | 0          |
| G6P-F6P | C00085 | Ctrl             | 19.1807523 | 1.34386516 | 0.07006321 | 17.7488121 | 20.4145391 | 19.3789056 | 1.63E-13  | *** | 1           | 0.07006321 |
| G6P-F6P | C00085 | HK2-ASO1         | 38.526889  | 3.52943184 | 0.09160957 | 35.2251961 | 38.108676  | 42.2467949 | 1.63E-13  | *** | 2.00862242  | 0.18400904 |
| G6P-F6P | C00085 | DPI              | 21.1147255 | 0.89545354 | 0.04240896 | 20.1033175 | 21.8065141 | 21.4343449 | 1.63E-13  | *** | 1.10082885  | 0.04668501 |
| G6P-F6P | C00085 | MET              | 14.3365736 | 0.79823871 | 0.05567849 | 15.0320239 | 14.5127251 | 13.4649718 | 1.63E-13  | *** | 0.74744585  | 0.04161665 |
| G6P-F6P | C00085 | PER              | 20.1905966 | 1.88673179 | 0.09344606 | 18.0150395 | 18.023268  | 21.1785236 | 1.63E-13  | *** | 1.05264884  | 0.09836589 |
| G6P-F6P | C00085 | HK2-ASO1-DPI     | 21.4237488 | 1.60800509 | 0.07505713 | 22.9392762 | 19.7369733 | 21.5949968 | 1.63E-13  | *** | 1.11693996  | 0.08383431 |
| G6P-F6P | C00085 | HK2-ASO1-DPI-PER | 9.49114456 | 0.50303048 | 0.05299998 | 10.0658582 | 9.13086425 | 9.27671123 | 1.63E-13  | *** | 0.4948265   | 0.0262258  |
| G6P-F6P | C00085 | HK2-ASO1-MET     | 8.89055521 | 0.30464962 | 0.03426666 | 9.17034434 | 8.93532231 | 8.565999   | 1.63E-13  | *** | 0.46351442  | 0.01588309 |
| G6P-F6P | C00085 | HK2-ASO1-MET-PER | 7.79868933 | 0.99410595 | 0.1274709  | 8.09400395 | 8.61167691 | 6.69038714 | 1.63E-13  | *** | 0.40658934  | 0.05182831 |
| GABA    | C00334 | Ctrl             | 5.94243164 | 2.15885622 | 0.36329509 | 4.98682837 | 4.42629823 | 8.41416832 | 1.83E-06  | *** | 1           | 0.36329509 |
| GABA    | C00334 | HK2-ASO1         | 4.38571886 | 1.35661478 | 0.30932552 | 5.92943147 | 3.38339086 | 3.84433425 | 1.83E-06  | *** | 0.73803438  | 0.22829287 |
| GABA    | C00334 | DPI              | 8.80456021 | 0.64622381 | 0.07339649 | 8.86233066 | 9.41995918 | 8.13139077 | 1.83E-06  | *** | 1.48164266  | 0.10874737 |
| GABA    | C00334 | MET              | 5.57214492 | 0.97668739 | 0.17528033 | 5.49521005 | 6.5850245  | 4.63620021 | 1.83E-06  | *** | 0.93768768  | 0.1643582  |
| GABA    | C00334 | PER              | 6.72849036 | 1.02407997 | 0.15220056 | 5.72289412 | 6.69247316 | 7.77010379 | 1.83E-06  | *** | 1.13227897  | 0.17233349 |
| GABA    | C00334 | HK2-ASO1-DPI     | 4.65461918 | 0.46999357 | 0.10097358 | 5.05937564 | 4.76532737 | 4.13915453 | 1.83E-06  | *** | 0.78328527  | 0.07909112 |
| GABA    | C00334 | HK2-ASO1-DPI-PER | 4.6249454  | 0.22996464 | 0.04972267 | 4.74430429 | 4.77068947 | 4.35984242 | 1.83E-06  | *** | 0.77829173  | 0.03869874 |
| GABA    | C00334 | HK2-ASO1-MET     | 1.91890234 | 0.67720981 | 0.35291521 | 2.6887706  | 1.65267067 | 1.41526574 | 1.83E-06  | *** | 0.32291534  | 0.11396173 |
| GABA    | C00334 | HK2-ASO1-MET-PER | 1.28011384 | 0.20109492 | 0.15709144 | 1.51204734 | 1.15443583 | 1.17385837 | 1.83E-06  | *** | 0.2154192   | 0.03384051 |
| GDP     | C00035 | Ctrl             | 36.8034953 | 2.53780981 | 0.06895567 | 34.694823  | 36.6960351 | 39.6199685 | 2.62E-08  | *** | 1           | 0.06895567 |
| GDP     | C00035 | HK2-ASO1         | 42.9566549 | 2.88612431 | 0.0671869  | 46.0131386 | 40.2781331 | 42.5786929 | 2.62E-08  | *** | 1.16718954  | 0.07841984 |
| GDP     | C00035 | DPI              | 60.2983315 | 6.27167203 | 0.10401071 | 54.492334  | 59.4527752 | 66.9498853 | 2.62E-08  | *** | 1.638386    | 0.17040968 |
| GDP     | C00035 | MET              | 62.8250066 | 6.44809032 | 0.10263573 | 70.1517508 | 60.3092335 | 58.0140355 | 2.62E-08  | *** | 1.70703913  | 0.15203292 |
| GDP     | C00035 | PER              | 35.4380845 | 0.28900706 | 0.00815527 | 35.1245296 | 35.693794  | 35.49593   | 2.62E-08  | *** | 0.96289997  | 0.00785271 |
| GDP     | C00035 | HK2-ASO1-DPI     | 37.7009086 | 1.00387039 | 0.02662722 | 37.2484652 | 38.8513743 | 37.0028862 | 2.62E-08  | *** | 1.02438391  | 0.0272765  |
| GDP     | C00035 | HK2-ASO1-DPI-PER | 47.4251047 | 4.77620133 | 0.1007104  | 49.6809222 | 41.9388058 | 50.6555861 | 2.62E-08  | *** | 1.28860328  | 0.12977575 |
| GDP     | C00035 | HK2-ASO1-MET     | 37.9359744 | 2.29398856 | 0.06047001 | 40.272847  | 37.8476554 | 35.6874209 | 2.62E-08  | *** | 1.03077097  | 0.06233073 |
| GDP     | C00035 | HK2-ASO1-MET-PER | 30.8128598 | 2.86339982 | 0.09292873 | 33.9995071 | 29.930925  | 28.45598   | 2.62E-08  | *** | 0.83722645  | 0.07780239 |
| Glc     | C00031 | Ctrl             | 779.044222 | 136.841882 | 0.17565355 | 707.274194 | 693.017391 | 936.841081 | 1.60E-05  | *** | 1           | 0.17565355 |
| Glc     | C00031 | HK2-ASO1         | 1785.8705  | 429.622302 | 0.24056744 | 1292.76606 | 2079.44746 | 1985.39799 | 1.60E-05  | *** | 2.29238656  | 0.55147358 |
| Glc     | C00031 | DPI              | 576.447206 | 190.200261 | 0.32995521 | 431.018932 | 506.633795 | 791.688891 | 1.60E-05  | *** | 0.73994157  | 0.24414565 |
| Glc     | C00031 | MET              | 566.360629 | 84.2336423 | 0.14872793 | 577.997204 | 476.913704 | 644.17098  | 1.60E-05  | *** | 0.7269942   | 0.10812434 |
| Glc     | C00031 | PER              | 984.058706 | 208.780343 | 0.21216249 | 1224.3932  | 847.498425 | 880.284498 | 1.60E-05  | *** | 1.26316155  | 0.26799555 |
| Glc     | C00031 | HK2-ASO1-DPI     | 2594.15155 | 494.853273 | 0.19075727 | 2042.451   | 2741.16227 | 2998.84139 | 1.60E-05  | *** | 3.32991566  | 0.63520563 |
| Glc     | C00031 | HK2-ASO1-DPI-PER | 1591.30977 | 331.257344 | 0.20816647 | 1867.97427 | 1224.23313 | 1681.72191 | 1.60E-05  | *** | 2.0426437   | 0.42520994 |
| Glc     | C00031 | HK2-ASO1-MET     | 1966.37119 | 723.897233 | 0.36813865 | 1477.36002 | 1623.78373 | 2797.96984 | 1.60E-05  | *** | 2.52408161  | 0.92921199 |
| Glc     | C00031 | HK2-ASO1-MET-PER | 1705.08698 | 219.42226  | 0.12868684 | 1551.07876 | 1956.32435 | 1607.85783 | 1.60E-05  | *** | 2.18869088  | 0.28165572 |
| GlcA    | C00257 | Ctrl             | 4207.42625 | 83.2995946 | 0.01979823 | 4113.55754 | 4272.53536 | 4236.18586 | 7.63E-16  | *** | 1           | 0.01979823 |
| GlcA    | C00257 | HK2-ASO1         | 2267.67705 | 254.361757 | 0.11216842 | NA         | 2087.81622 | 2447.53797 | 7.63E-16  | *** | 0.53897012  | 0.06045543 |
| GlcA    | C00257 | DPI              | 4466.91376 | 139.571701 | 0.03124567 | 4612.60441 | 4453.74201 | 4334.39486 | 7.63E-16  | *** | 1.06167369  | 0.0331727  |
| GlcA    | C00257 | MET              | 4089.51621 | 260.193293 | 0.06362447 | 4169.87777 | 4300.04854 | 3798.62232 | 7.63E-16  | *** | 0.97197573  | 0.06184144 |
| GlcA    | C00257 | PER              | 4643.94803 | 308.18     | 0.06636164 | 4369.71105 | 4977.46019 | 4584.67286 | 7.63E-16  | *** | 1.10375031  | 0.07324668 |
| GlcA    | C00257 | HK2-ASO1-DPI     | 1623.69588 | 74.3673948 | 0.04580131 | 1591.80026 | 1570.59652 | 1708.69086 | 7.63E-16  | *** | 0.3859119   | 0.01767527 |
| GlcA    | C00257 | HK2-ASO1-DPI-PER | 1460.35154 | 155.222085 | 0.1062909  | 1626.42859 | 1318.93746 | 1435.68858 | 7.63E-16  | *** | 0.34708904  | 0.03689241 |
| GlcA    | C00257 | HK2-ASO1-MET     | 849.917166 | 60.1933018 | 0.07082255 | 794.493589 | 913.952554 | 841.305355 | 7.63E-16  | *** | 0.20200406  | 0.01430644 |
| GlcA    | C00257 | HK2-ASO1-MET-PER | 1034.73665 | 138.086717 | 0.13345107 | 1185.78601 | 1003.43874 | 914.985187 | 7.63E-16  | *** | 0.24593102  | 0.03281976 |
| GlcN    | C00329 | Ctrl             | 1917.69454 | 165.579074 | 0.08634278 | 1761.42646 | 1900.42605 | 2091.23112 | 3.76E-06  | *** | 1           | 0.08634278 |
| GlcN    | C00329 | HK2-ASO1         | 4904.62994 | 473.473001 | 0.09653593 | 4945.19487 | 5442.10589 | 4722.58906 | 3.76E-06  | *** | 2.55756578  | 0.24689698 |
| GlcN    | C00329 | DPI              | 888.025335 | 404.496598 | 0.45550119 | 555.973349 | 769.580589 | 1338.52207 | 3.76E-06  | *** | 0.46306923  | 0.21092859 |
| GlcN    | C00329 | MET              | 1330.92101 | 303.127616 | 0.22775778 | 1591.76213 | 998.367363 | 1402.63354 | 3.76E-06  | *** | 0.69402138  | 0.15806877 |
| GlcN    | C00329 | PER              | 878.88391  | 344.32618  | 0.39177663 | 699.521141 | 661.266961 | 1275.86363 | 3.76E-06  | *** | 0.45830235  | 0.17955215 |
| GlcN    | C00329 | HK2-ASO1-DPI     | 1371.80722 | 357.924171 | 0.26091434 | 1784.40613 | 1144.73965 | 1186.27587 | 3.76E-06  | *** | 0.71534188  | 0.18664295 |
| GlcN    | C00329 | HK2-ASO1-DPI-PER | 4078.93029 | 216.467894 | 0.05306977 | 3906.40484 | 4008.      |            |           |     |             |            |

|              |        |                  |            |            |            |            |            |            |            |     |            |            |
|--------------|--------|------------------|------------|------------|------------|------------|------------|------------|------------|-----|------------|------------|
| GlcN-6P      | C00352 | MET              | 10.4363505 | 0.27313656 | 0.02617165 | 10.7253432 | 10.182465  | 10.4012432 | 6.19E-08   | *** | 1.97440825 | 0.05167353 |
| GlcN-6P      | C00352 | PER              | 9.09439933 | 0.29136378 | 0.03203772 | 9.22498821 | 9.29762446 | 8.76058531 | 6.19E-08   | *** | 1.72053029 | 0.05512186 |
| GlcN-6P      | C00352 | HK2-ASO1-DPI     | 7.05537394 | 0.51866244 | 0.0735131  | 6.5391236  | 6.77411965 | 6.7380898  | 6.19E-08   | *** | 1.33477584 | 0.09812352 |
| GlcN-6P      | C00352 | HK2-ASO1-DPI-PER | 6.41394115 | 0.71649596 | 0.11170916 | 7.06378059 | 5.64557133 | 6.53247152 | 6.19E-08   | *** | 1.21342594 | 0.13555079 |
| GlcN-6P      | C00352 | HK2-ASO1-MET     | 3.45319692 | 0.59090438 | 0.17111807 | 3.71716258 | 3.86610819 | 2.77631998 | 6.19E-08   | *** | 0.65329547 | 0.11179066 |
| GlcN-6P      | C00352 | HK2-ASO1-MET-PER | 4.14189585 | 0.43510379 | 0.10504943 | 4.32422474 | 4.45617245 | 3.64529036 | 6.19E-08   | *** | 0.78358746 | 0.08231541 |
| GlcNac       | C00140 | Ctrl             | 3.0944945  | 1.57169983 | 0.50790196 | 2.70815659 | 1.75198848 | 4.82333842 | 2.50E-07   | *** | 1          | 0.50790196 |
| GlcNac       | C00140 | HK2-ASO1         | 4.45186405 | 1.27951439 | 0.28741093 | 3.83425032 | 3.59831467 | 5.92302716 | 2.50E-07   | *** | 1.43864016 | 0.41348091 |
| GlcNac       | C00140 | DPI              | 2.58265838 | 0.19708153 | 0.07630956 | 2.48375118 | 2.45461788 | 2.80960607 | 2.50E-07   | *** | 0.83459783 | 0.0636878  |
| GlcNac       | C00140 | MET              | 2.30149826 | 0.69311469 | 0.30115803 | 2.01261144 | 3.09232876 | 1.79955458 | 2.50E-07   | *** | 0.74373965 | 0.22398317 |
| GlcNac       | C00140 | PER              | 4.69350171 | 0.87487486 | 0.18640131 | 4.65797559 | 5.58559848 | 3.83693105 | 2.50E-07   | *** | 1.51672647 | 0.2827198  |
| GlcNac       | C00140 | HK2-ASO1-DPI     | 3.38532228 | 0.15336406 | 0.04530265 | 3.2223007  | 3.40692893 | 3.52673722 | 2.50E-07   | *** | 1.09398232 | 0.04956029 |
| GlcNac       | C00140 | HK2-ASO1-DPI-PER | 11.1998937 | 3.66963684 | 0.32764925 | 14.029411  | 7.0535406  | 12.5167296 | 2.50E-07   | *** | 3.6192967  | 1.18585987 |
| GlcNac       | C00140 | HK2-ASO1-MET     | 18.905779  | 3.56070859 | 0.18833969 | 18.3013983 | 15.6859403 | 22.7299984 | 2.50E-07   | *** | 6.10948865 | 1.15065521 |
| GlcNac       | C00140 | HK2-ASO1-MET-PER | 31.2366722 | 10.3462173 | 0.33122022 | 27.9168101 | 42.8353204 | 22.957886  | 2.50E-07   | *** | 10.094273  | 3.34342727 |
| GlcNac-6P    | C00357 | Ctrl             | 1.04348049 | 0.13821652 | 0.13245722 | 1.02982439 | 1.18801816 | 0.91259891 | 1.10E-13   | *** | 1          | 0.13245722 |
| GlcNac-6P    | C00357 | HK2-ASO1         | 0.52925231 | 0.54996816 | 1.03914173 | NA         | 0.14036609 | 0.91813852 | 1.10E-13   | *** | 0.50719904 | 0.52705169 |
| GlcNac-6P    | C00357 | DPI              | 1.16454398 | 0.29854454 | 0.25636175 | 1.07521233 | 1.49755635 | 0.92086324 | 1.10E-13   | *** | 1.11601893 | 0.28610457 |
| GlcNac-6P    | C00357 | MET              | 1.9209794  | 0.05522438 | 0.02874803 | 1.85765628 | 1.95915011 | 1.94613181 | 1.10E-13   | *** | 1.84093466 | 0.05292325 |
| GlcNac-6P    | C00357 | PER              | 1.51173373 | 0.01460454 | 0.00966709 | 1.52370921 | 1.51602868 | 1.49546331 | 1.10E-13   | *** | 1.44874174 | 0.01399599 |
| GlcNac-6P    | C00357 | HK2-ASO1-DPI     | 6.21582353 | 0.21819851 | 0.03510372 | 6.43308375 | 6.21768817 | 5.99669867 | 1.10E-13   | *** | 5.95681818 | 0.20910646 |
| GlcNac-6P    | C00357 | HK2-ASO1-DPI-PER | 22.9616642 | 2.65607218 | 0.1156742  | 23.914933  | 19.9605144 | 25.0095454 | 1.10E-13   | *** | 22.0048813 | 2.54539705 |
| GlcNac-6P    | C00357 | HK2-ASO1-MET     | 18.1459959 | 0.70393726 | 0.03879298 | 18.5309531 | 17.3335305 | 18.5735041 | 1.10E-13   | *** | 17.3898756 | 0.67460511 |
| GlcNac-6P    | C00357 | HK2-ASO1-MET-PER | 25.5941452 | 3.58799792 | 0.14018823 | 26.2987538 | 28.7775691 | 21.7061126 | 1.10E-13   | *** | 24.5276702 | 3.43849068 |
| Gln          | C00064 | Ctrl             | 8356.2361  | 148.234828 | 0.01773943 | 8382.2138  | 8489.76494 | 8196.72956 | 7.79E-07   | *** | 1          | 0.01773943 |
| Gln          | C00064 | HK2-ASO1         | 9589.38346 | 1204.52346 | 0.1256101  | 8283.97415 | 9826.38793 | 10657.7883 | 7.79E-07   | *** | 1.14757211 | 0.14414665 |
| Gln          | C00064 | DPI              | 10747.556  | 1001.12922 | 0.09314948 | 9691.23792 | 10869.0165 | 11682.4137 | 7.79E-07   | *** | 1.2861719  | 0.11980624 |
| Gln          | C00064 | MET              | 11475.9422 | 989.919679 | 0.08626043 | 11982.952  | 10335.2244 | 12109.6502 | 7.79E-07   | *** | 1.37333867 | 0.1846478  |
| Gln          | C00064 | PER              | 8836.85516 | 164.631921 | 0.01863015 | 9016.03082 | 8692.26069 | 8802.27397 | 7.79E-07   | *** | 1.05751621 | 0.01970168 |
| Gln          | C00064 | HK2-ASO1-DPI     | 12654.2552 | 560.390929 | 0.04428478 | 12009.1407 | 12933.1267 | 13020.4982 | 7.79E-07   | *** | 1.51434869 | 0.0670626  |
| Gln          | C00064 | HK2-ASO1-DPI-PER | 8452.06962 | 756.900116 | 0.08955204 | 9165.76526 | 7698.32744 | 8532.11616 | 7.79E-07   | *** | 1.0114685  | 0.09057907 |
| Gln          | C00064 | HK2-ASO1-MET     | 8179.34404 | 1145.71482 | 0.14007417 | 8420.44447 | 6932.26579 | 9185.32185 | 7.79E-07   | *** | 0.97883113 | 0.13710896 |
| Gln          | C00064 | HK2-ASO1-MET-PER | 6576.38807 | 351.824036 | 0.05349806 | 6675.27215 | 7688.18877 | 6185.70329 | 7.79E-07   | *** | 0.78700362 | 0.04210317 |
| Glu          | C00025 | Ctrl             | 7478.9157  | 490.135135 | 0.06553559 | 6923.26951 | 7849.88081 | 7663.59677 | 1.08E-12   | *** | 1          | 0.06553559 |
| Glu          | C00025 | HK2-ASO1         | 9285.93616 | 690.828603 | 0.07439515 | 8999.39127 | 8784.48915 | 10073.9281 | 1.08E-12   | *** | 1.2416153  | 0.09237016 |
| Glu          | C00025 | DPI              | 7797.5313  | 373.893039 | 0.04795018 | 7369.3073  | 8059.22648 | 7964.06012 | 1.08E-12   | *** | 1.04260184 | 0.04999295 |
| Glu          | C00025 | MET              | 6935.4164  | 308.8771   | 0.0445362  | 7275.76608 | 6857.58134 | 6672.90179 | 1.08E-12   | *** | 0.92732913 | 0.04129972 |
| Glu          | C00025 | PER              | 8912.71189 | 629.832886 | 0.07066681 | 8334.76651 | 9584.01143 | 8819.35772 | 1.08E-12   | *** | 1.19171177 | 0.08421447 |
| Glu          | C00025 | HK2-ASO1-DPI     | 7536.21026 | 392.018049 | 0.05201793 | 7986.99636 | 7275.15115 | 7346.48327 | 1.08E-12   | *** | 1.00766081 | 0.05241643 |
| Glu          | C00025 | HK2-ASO1-DPI-PER | 4210.84924 | 334.337705 | 0.07939912 | 4462.00882 | 3831.35834 | 4339.18055 | 1.08E-12   | *** | 0.56302938 | 0.04470403 |
| Glu          | C00025 | HK2-ASO1-MET     | 3340.59202 | 495.349567 | 0.14828197 | 3868.45095 | 3267.43705 | 2885.88807 | 1.08E-12   | *** | 0.44666796 | 0.06623281 |
| Glu          | C00025 | HK2-ASO1-MET-PER | 2582.34212 | 237.509043 | 0.09197427 | 2810.39489 | 2600.24183 | 2336.38963 | 1.08E-12   | *** | 0.34528296 | 0.03175715 |
| Gluca        | C00191 | Ctrl             | 0.64636789 | 0.39344864 | 0.60870697 | 0.6673566  | 1.02890208 | 0.24284499 | 7.71E-06   | *** | 1          | 0.60870697 |
| Gluca        | C00191 | HK2-ASO1         | 0.60107074 | 0.76323222 | 1.26978767 | 1.14075142 | 0.06138407 | NA         | 7.71E-06   | *** | 0.92929049 | 1.18800157 |
| Gluca        | C00191 | DPI              | 1.39906815 | 0.09338218 | 0.06674598 | 1.2999197  | 1.48534959 | 1.41193515 | 7.71E-06   | *** | 2.16450751 | 0.14447218 |
| Gluca        | C00191 | MET              | 0.84324542 | 0.02316338 | 0.02746932 | 0.83684242 | 0.86893677 | 0.82395708 | 7.71E-06   | *** | 1.30459053 | 0.03583621 |
| Gluca        | C00191 | PER              | 1.17597619 | 0.37473605 | 0.31865956 | 1.36805565 | 1.4157284  | 0.74414453 | 7.71E-06   | *** | 1.81936048 | 0.57975661 |
| Gluca        | C00191 | HK2-ASO1-DPI     | 0          | 0          | 0          | 0          | 0          | 0          | 7.71E-06   | *** | 0          | 0          |
| Gluca        | C00191 | HK2-ASO1-DPI-PER | 0          | 0          | 0          | 0          | 0          | 0          | 7.71E-06   | *** | 0          | 0          |
| Gluca        | C00191 | HK2-ASO1-MET     | 0          | 0          | 0          | 0          | 0          | 0          | 7.71E-06   | *** | 0          | 0          |
| Gluca        | C00191 | HK2-ASO1-MET-PER | 0          | 0          | 0          | 0          | 0          | 0          | 7.71E-06   | *** | 0          | 0          |
| Gly          | C00037 | Ctrl             | 598.804562 | 46.8534519 | 0.07824498 | 638.036153 | 611.451866 | 546.925666 | 7.54E-06   | *** | 1          | 0.07824498 |
| Gly          | C00037 | HK2-ASO1         | 819.692326 | 82.0812077 | 0.10013661 | 909.852951 | 799.922506 | 749.301522 | 7.54E-06   | *** | 1.36888123 | 0.13707512 |
| Gly          | C00037 | DPI              | 668.234998 | 124.762153 | 0.18670401 | 533.602191 | 591.154308 | 779.948488 | 7.54E-06   | *** | 1.11594841 | 0.20835204 |
| Gly          | C00037 | MET              | 599.422567 | 54.8402546 | 0.09148847 | 655.569921 | 545.990273 | 596.707506 | 7.54E-06   | *** | 1.00103206 | 0.09158289 |
| Gly          | C00037 | PER              | 623.899057 | 26.4200965 | 0.04234675 | 636.630523 | 641.542777 | 593.523871 | 7.54E-06   | *** | 1.04190766 | 0.0441214  |
| Gly          | C00037 | HK2-ASO1-DPI     | 981.728111 | 153.510331 | 0.15636746 | 1153.60675 | 933.321717 | 858.255861 | 7.54E-06   | *** | 1.63948001 | 0.25636133 |
| Gly          | C00037 | HK2-ASO1-DPI-PER | 560.389685 | 40.83193   | 0.07286346 | 557.317892 | 521.180402 | 602.670759 | 7.54E-06   | *** | 0.93584739 | 0.06818908 |
| Gly          | C00037 | HK2-ASO1-MET     | 499.286202 | 99.6839557 | 0.19965293 | 607.296693 | 410.825313 | 479.736601 | 7.54E-06   | *** | 0.83380494 | 0.1664716  |
| Gly          | C00037 | HK2-ASO1-MET-PER | 416.308347 | 12.6382824 | 0.03035798 | 411.413339 | 430.661957 | 406.849745 | 7.54E-06   | *** | 0.69523242 | 0.02110586 |
| Glycerol     | C00116 | Ctrl             | 0.21112481 | 0.13607335 | 0.64451613 | 0.34303559 | 0.21909921 | 0.07123963 | 0.06767973 |     | 1          | 0.64451613 |
| Glycerol     | C00116 | HK2-ASO1         | 1.03264209 | 1.16504343 | 1.1282161  | 1.8564522  | NA         | 0.20883198 | 0.06767973 |     | 4.89114517 | 5.51826872 |
| Glycerol     | C00116 | DPI              | 0          | 0          | 0          | 0          | 0          | 0          | 0.06767973 |     | 0          | 0          |
| Glycerol     | C00116 | MET              | 0          | 0          | 0          | 0          | 0          | 0          | 0.06767973 |     | 0          | 0          |
| Glycerol     | C00116 | PER              | 0.12833204 | 0.09196222 | 0.71659595 | NA         | 0.19335914 | 0.06330493 | 0.06767973 |     | 0.60784915 | 0.43558224 |
| Glycerol     | C00116 | HK2-ASO1-DPI     | 0.4229304  | 0.29448407 | 0.69629441 | 0.24408753 | 0.26188768 | 0.76281598 | 0.06767973 |     | 2.00322453 | 1.39483403 |
| Glycerol     | C00116 | HK2-ASO1-DPI-PER | 0.1756321  | 0.01719139 | 0.09788295 | NA         | 0.16347596 | 0.18778825 | 0.06767973 |     | 0.83188757 | 0.08142761 |
| Glycerol     | C00116 | HK2-ASO1-MET     | 0          | 0          | 0          | 0          | 0          | 0          | 0.06767973 |     | 0          | 0          |
| Glycerol     | C00116 | HK2-ASO1-MET-PER | 0          | 0          | 0          | 0          | 0          | 0          | 0.06767973 |     | 0          | 0          |
| Glycerol-3-P | C00093 | Ctrl             | 55.9248372 | 4.95442971 | 0.08859086 | 58.0514446 | 59.4609389 | 50.2621282 | 5.17E-16   | *** | 1          | 0.08859086 |
| Glycerol-3-P | C00093 | HK2-ASO1         | 7.66045803 | 0.63334322 | 0.08267694 | NA         | 7.21261674 | 8.10829931 | 5.17E-16   | *** | 0.13697774 | 0.0113249  |
| Glycerol-3-P | C00093 | DPI              | 25.0177368 | 2.18295752 | 0.08725639 | 22.82113   | 25.0452964 | 27.1867841 | 5.17E-16   | *** | 0.44734572 | 0.03903378 |
| Glycerol-3-P | C00093 | MET              | 18.3575196 | 2.15198174 | 0.11722617 | 20.6169925 | 18.12339   | 16.3321761 | 5.17E-16   | *** | 0.32825343 | 0.03847989 |
| Glycerol-3-P | C00093 | PER              | 53.5605174 | 2.96397529 | 0.05533881 | 56.7159346 | 53.1307009 | 50.8349167 | 5.17E-16   | *** | 0.95772326 | 0.05299927 |
| Glycerol-3-P | C00093 | HK2-ASO1-DPI     | 7.43218334 | 0.60114814 | 0.08088446 | 7.33579431 | 6.88505361 | 8.0757021  | 5.17E-16   | *** | 0.13289593 | 0.01074922 |
| Glycerol-3-P | C00093 | HK2-ASO1-DPI-PER | 5.53285691 | 0.6504272  | 0.11755721 | 4.82889879 | 5.65814726 | 6.11152467 | 5.17E-16   | *** | 0.0989338  | 0.01163038 |
| Glycerol-3-P | C00093 | HK2-ASO1-MET     | 3.3        |            |            |            |            |            |            |     |            |            |



|              |        |                  |            |            |            |            |            |            |          |     |            |            |
|--------------|--------|------------------|------------|------------|------------|------------|------------|------------|----------|-----|------------|------------|
| GMP          | C00144 | HK2-ASO1-DPI     | 25.2884533 | 3.04674158 | 0.12047955 | 28.8061274 | 23.5755605 | 23.4836719 | 4.96E-14 | *** | 2.6951885  | 0.32471511 |
| GMP          | C00144 | HK2-ASO1-DPI-PER | 63.4237123 | 8.0617581  | 0.12710953 | 63.2693191 | 55.4402596 | 71.5615581 | 4.96E-14 | *** | 6.75956169 | 0.85920469 |
| GMP          | C00144 | HK2-ASO1-MET     | 79.9878921 | 4.97817685 | 0.06223663 | 84.2501573 | 74.51654   | 81.196979  | 4.96E-14 | *** | 8.52493605 | 0.53056329 |
| GMP          | C00144 | HK2-ASO1-MET-PER | 103.935694 | 11.7706532 | 0.11324938 | 109.139944 | 112.207166 | 90.459972  | 4.96E-14 | *** | 11.0772408 | 1.25449069 |
| GSH          | C00051 | Ctrl             | 1195.08261 | 20.8693007 | 0.01746264 | 1217.17009 | 1192.38366 | 1175.6941  | 2.72E-12 | *** | 1          | 0.01746264 |
| GSH          | C00051 | HK2-ASO1         | 1157.78967 | 123.529331 | 0.1066941  | NA         | 1070.44124 | 1245.1381  | 2.72E-12 | *** | 0.96879467 | 0.10336468 |
| GSH          | C00051 | DPI              | 1259.64941 | 120.291133 | 0.09549572 | 1395.1983  | 1218.13959 | 1165.61033 | 2.72E-12 | *** | 1.05402705 | 0.10065508 |
| GSH          | C00051 | MET              | 1170.41083 | 139.405498 | 0.11910818 | 1161.64691 | 1313.99152 | 1035.59405 | 2.72E-12 | *** | 0.97935558 | 0.11664926 |
| GSH          | C00051 | PER              | 1527.62654 | 119.425167 | 0.07817694 | 1467.84922 | 1665.13664 | 1449.89375 | 2.72E-12 | *** | 1.2782602  | 0.09993047 |
| GSH          | C00051 | HK2-ASO1-DPI     | 817.012808 | 29.4257634 | 0.03601628 | 796.388593 | 803.939945 | 850.709887 | 2.72E-12 | *** | 0.68364546 | 0.02462237 |
| GSH          | C00051 | HK2-ASO1-DPI-PER | 457.208598 | 68.4884255 | 0.14979689 | 530.049911 | 394.118263 | 447.457621 | 2.72E-12 | *** | 0.38257489 | 0.05730853 |
| GSH          | C00051 | HK2-ASO1-MET     | 236.044826 | 67.7436881 | 0.28699501 | 244.461614 | 299.186826 | 164.486038 | 2.72E-12 | *** | 0.1975134  | 0.05668536 |
| GSH          | C00051 | HK2-ASO1-MET-PER | 161.129114 | 56.4013129 | 0.350038   | 226.175596 | 125.808646 | 131.4031   | 2.72E-12 | *** | 0.13482676 | 0.04719449 |
| GSH/GSSG     | NA     | NA               | 8.57211283 | 0.58539129 | 0.0682902  | 9.24799516 | 8.22578937 | 8.24255395 | 7.94E-08 | *** | 1          | 0.0682902  |
| GSH/GSSG     | NA     | HK2-ASO1         | 8.65314575 | 0.92629708 | 0.10704744 | NA         | 7.9981548  | 9.3081367  | 7.94E-08 | *** | 1.00945309 | 0.10805937 |
| GSH/GSSG     | NA     | DPI              | 8.99790455 | 0.91073656 | 0.10121652 | 10.0493139 | 8.490771   | 8.45362877 | 7.94E-08 | *** | 1.04967174 | 0.10624412 |
| GSH/GSSG     | NA     | MET              | 9.80840298 | 1.83087433 | 0.18666386 | 8.6065638  | 11.9155721 | 8.903073   | 7.94E-08 | *** | 1.14422234 | 0.21358495 |
| GSH/GSSG     | NA     | PER              | 10.3293131 | 1.50533118 | 0.14573391 | 9.98861862 | 11.9757929 | 9.02352772 | 7.94E-08 | *** | 1.20499033 | 0.17560795 |
| GSH/GSSG     | NA     | HK2-ASO1-DPI     | 6.10717374 | 0.27991957 | 0.04583455 | 5.79501737 | 6.19063122 | 6.33587262 | 7.94E-08 | *** | 0.71244673 | 0.03265468 |
| GSH/GSSG     | NA     | HK2-ASO1-DPI-PER | 4.84367239 | 0.25768487 | 0.05320031 | 4.74979013 | 4.64609138 | 5.13513567 | 7.94E-08 | *** | 0.56505    | 0.03006083 |
| GSH/GSSG     | NA     | HK2-ASO1-MET     | 3.34175696 | 0.71645351 | 0.21439426 | 3.04735858 | 4.15851036 | 2.81940194 | 7.94E-08 | *** | 0.38984052 | 0.08357957 |
| GSH/GSSG     | NA     | HK2-ASO1-MET-PER | 2.88524197 | 0.66271639 | 0.22969179 | 3.60036862 | 2.29180067 | 2.76355662 | 7.94E-08 | *** | 0.33658469 | 0.07731074 |
| GSSG         | C00127 | Ctrl             | 139.736113 | 7.12852394 | 0.05101419 | 131.614481 | 144.956746 | 142.637113 | 2.04E-08 | *** | 1          | 0.05101419 |
| GSSG         | C00127 | HK2-ASO1         | 146.603003 | 22.1713155 | 0.15123371 | 172.204203 | 133.836024 | 133.768871 | 2.04E-08 | *** | 1.04914184 | 0.15866561 |
| GSSG         | C00127 | DPI              | 140.061443 | 2.98690152 | 0.02132655 | 138.835179 | 143.466311 | 137.882839 | 2.04E-08 | *** | 1.00232817 | 0.0213753  |
| GSSG         | C00127 | MET              | 120.522026 | 12.8738875 | 0.10681772 | 134.972207 | 110.275151 | 116.318719 | 2.04E-08 | *** | 0.86249734 | 0.09213    |
| GSSG         | C00127 | PER              | 148.891101 | 10.9482299 | 0.0735318  | 146.952174 | 139.04187  | 160.67926  | 2.04E-08 | *** | 1.06551626 | 0.07834932 |
| GSSG         | C00127 | HK2-ASO1-DPI     | 133.853062 | 3.9833459  | 0.0283769  | 137.426438 | 129.86397  | 134.26878  | 2.04E-08 | *** | 0.95789885 | 0.0271822  |
| GSSG         | C00127 | HK2-ASO1-DPI-PER | 94.5195932 | 14.8321866 | 0.15692182 | 111.594386 | 84.8279191 | 87.1364749 | 2.04E-08 | *** | 0.67641493 | 0.10614426 |
| GSSG         | C00127 | HK2-ASO1-MET     | 70.1690837 | 11.0476942 | 0.1574439  | 80.2208232 | 71.9456729 | 58.340755  | 2.04E-08 | *** | 0.50215425 | 0.07906112 |
| GSSG         | C00127 | HK2-ASO1-MET-PER | 55.0879256 | 7.63761343 | 0.13864406 | 62.820122  | 54.8951082 | 47.5485465 | 2.04E-08 | *** | 0.39422827 | 0.05465741 |
| His          | C00135 | Ctrl             | 946.254098 | 37.9270454 | 0.04008125 | 913.144106 | 937.98457  | 987.63362  | 5.21E-05 | *** | 1          | 0.04008125 |
| His          | C00135 | HK2-ASO1         | 1083.74494 | 239.251923 | 0.22076405 | 816.825447 | 1155.50405 | 1278.90533 | 5.21E-05 | *** | 1.14530013 | 0.2528411  |
| His          | C00135 | DPI              | 1128.27593 | 111.91021  | 0.09918692 | 1042.72341 | 1087.18044 | 1254.92394 | 5.21E-05 | *** | 1.19236041 | 0.11826655 |
| His          | C00135 | MET              | 1208.63512 | 88.5853577 | 0.07329371 | 1308.90076 | 1176.03703 | 1140.96757 | 5.21E-05 | *** | 1.27728389 | 0.09361688 |
| His          | C00135 | PER              | 1040.424   | 26.6005043 | 0.02556698 | 1070.67252 | 1029.92111 | 1020.67836 | 5.21E-05 | *** | 1.09951862 | 0.02811138 |
| His          | C00135 | HK2-ASO1-DPI     | 1456.41888 | 118.9959   | 0.08170445 | 1384.24664 | 1391.24593 | 1593.76408 | 5.21E-05 | *** | 1.53914143 | 0.1257547  |
| His          | C00135 | HK2-ASO1-DPI-PER | 943.973627 | 152.843868 | 0.1619154  | 1106.97353 | 803.868885 | 921.078466 | 5.21E-05 | *** | 0.99759    | 0.16152518 |
| His          | C00135 | HK2-ASO1-MET     | 887.413778 | 176.117134 | 0.19846112 | 859.318793 | 727.032923 | 1075.88962 | 5.21E-05 | *** | 0.93781763 | 0.18612034 |
| His          | C00135 | HK2-ASO1-MET-PER | 637.896595 | 55.5437164 | 0.08707323 | 676.074375 | 663.438943 | 574.176469 | 5.21E-05 | *** | 0.67412822 | 0.05869852 |
| Homocysteine | C00155 | Ctrl             | 0          | 0          | NA         | 0          | 0          | 0          | 6.28E-09 | *** | NA         | NA         |
| Homocysteine | C00155 | HK2-ASO1         | 0          | 0          | NA         | 0          | 0          | 0          | 6.28E-09 | *** | NA         | NA         |
| Homocysteine | C00155 | DPI              | 0          | 0          | NA         | 0          | 0          | 0          | 6.28E-09 | *** | NA         | NA         |
| Homocysteine | C00155 | MET              | 0          | 0          | NA         | 0          | 0          | 0          | 6.28E-09 | *** | NA         | NA         |
| Homocysteine | C00155 | PER              | 0          | 0          | NA         | 0          | 0          | 0          | 6.28E-09 | *** | NA         | NA         |
| Homocysteine | C00155 | HK2-ASO1-DPI     | 0          | 0          | NA         | 0          | 0          | 0          | 6.28E-09 | *** | NA         | NA         |
| Homocysteine | C00155 | HK2-ASO1-DPI-PER | 3.59511696 | 1.34587983 | 0.37436329 | 4.63633471 | 2.0753626  | 4.07365357 | 6.28E-09 | *** | Inf        | Inf        |
| Homocysteine | C00155 | HK2-ASO1-MET     | 11.6125379 | 4.21406945 | 0.36288962 | 8.84648764 | 9.5285607  | 16.4625655 | 6.28E-09 | *** | Inf        | Inf        |
| Homocysteine | C00155 | HK2-ASO1-MET-PER | 11.7582101 | 1.78264696 | 0.1516087  | 10.969265  | 13.7991955 | 10.5061698 | 6.28E-09 | *** | Inf        | Inf        |
| HS2O3        | C00320 | Ctrl             | 9.18404878 | 0.85378551 | 0.09296396 | 8.59599756 | 8.79280325 | 10.1633455 | 1.35E-11 | *** | 1          | 0.09296396 |
| HS2O3        | C00320 | HK2-ASO1         | 17.2588321 | 2.83061211 | 0.16400948 | 20.5209169 | 15.450401  | 15.8051783 | 1.35E-11 | *** | 1.87921825 | 0.30820961 |
| HS2O3        | C00320 | DPI              | 13.3812081 | 1.12952793 | 0.08441151 | 13.9204758 | 14.1400324 | 12.0831162 | 1.35E-11 | *** | 1.45700534 | 0.12298801 |
| HS2O3        | C00320 | MET              | 14.6782804 | 1.27135003 | 0.08661437 | 14.3259987 | 16.0886231 | 13.6202195 | 1.35E-11 | *** | 1.59823633 | 0.13843022 |
| HS2O3        | C00320 | PER              | 9.01381022 | 0.49049908 | 0.0544163  | 9.48236731 | 8.50397763 | 9.05508574 | 1.35E-11 | *** | 0.98146367 | 0.05340773 |
| HS2O3        | C00320 | HK2-ASO1-DPI     | 24.3323198 | 2.17735904 | 0.08948424 | 25.2481868 | 21.846633  | 25.9021394 | 1.35E-11 | *** | 2.64941099 | 0.23780552 |
| HS2O3        | C00320 | HK2-ASO1-DPI-PER | 25.8502404 | 1.08380077 | 0.04192614 | 26.7703634 | 24.6555672 | 26.1247905 | 1.35E-11 | *** | 2.81468892 | 0.11800904 |
| HS2O3        | C00320 | HK2-ASO1-MET     | 29.897314  | 3.19689728 | 0.10692925 | 33.5761733 | 28.3217942 | 27.7939747 | 1.35E-11 | *** | 3.25535227 | 0.34809237 |
| HS2O3        | C00320 | HK2-ASO1-MET-PER | 28.1426898 | 0.39577775 | 0.01406325 | 27.9247224 | 28.5995351 | 27.903812  | 1.35E-11 | *** | 3.064301   | 0.04309404 |
| Hypoxanthine | C00262 | Ctrl             | 0          | 0          | NA         | 0          | 0          | 0          | 1.08E-08 | *** | NA         | NA         |
| Hypoxanthine | C00262 | HK2-ASO1         | 0          | 0          | NA         | 0          | 0          | 0          | 1.08E-08 | *** | NA         | NA         |
| Hypoxanthine | C00262 | DPI              | 0          | 0          | NA         | 0          | 0          | 0          | 1.08E-08 | *** | NA         | NA         |
| Hypoxanthine | C00262 | MET              | 0          | 0          | NA         | 0          | 0          | 0          | 1.08E-08 | *** | NA         | NA         |
| Hypoxanthine | C00262 | PER              | 0          | 0          | NA         | 0          | 0          | 0          | 1.08E-08 | *** | NA         | NA         |
| Hypoxanthine | C00262 | HK2-ASO1-DPI     | 0          | 0          | NA         | 0          | 0          | 0          | 1.08E-08 | *** | NA         | NA         |
| Hypoxanthine | C00262 | HK2-ASO1-DPI-PER | 3.19398958 | 1.78557362 | 0.55904178 | 4.69684531 | 1.22012904 | 3.66499439 | 1.08E-08 | *** | Inf        | Inf        |
| Hypoxanthine | C00262 | HK2-ASO1-MET     | 16.7291731 | 6.30609016 | 0.37695169 | 15.5688994 | 11.0837902 | 23.5348298 | 1.08E-08 | *** | Inf        | Inf        |
| Hypoxanthine | C00262 | HK2-ASO1-MET-PER | 16.3553351 | 2.39780839 | 0.14660711 | 16.4152783 | 18.7226099 | 13.9281172 | 1.08E-08 | *** | Inf        | Inf        |
| IMP          | C00130 | Ctrl             | 4.0602754  | 0.35935732 | 0.08850565 | 3.77660085 | 4.46438019 | 3.93984515 | 2.87E-09 | *** | 1          | 0.08850565 |
| IMP          | C00130 | HK2-ASO1         | 8.99359132 | 1.21574394 | 0.13517892 | 10.1392856 | 7.71819751 | 9.12329087 | 2.87E-09 | *** | 2.21502003 | 0.29942401 |
| IMP          | C00130 | DPI              | 7.46588775 | 0.80385156 | 0.10766992 | 6.89793306 | 7.11406015 | 8.38567004 | 2.87E-09 | *** | 1.83876388 | 0.19779757 |
| IMP          | C00130 | MET              | 6.45421124 | 0.89975134 | 0.13940531 | 6.86169699 | 7.0781271  | 5.42280962 | 2.87E-09 | *** | 1.58959938 | 0.2215986  |
| IMP          | C00130 | PER              | 5.78620385 | 0.60459409 | 0.1044889  | 5.2368881  | 6.43398793 | 5.68773552 | 2.87E-09 | *** | 1.4250767  | 0.1489047  |
| IMP          | C00130 | HK2-ASO1-DPI     | 4.32431689 | 0.25546459 | 0.05907629 | 4.59578357 | 4.28854124 | 4.08862586 | 2.87E-09 | *** | 1.06503044 | 0.06291805 |
| IMP          | C00130 | HK2-ASO1-DPI-PER | 2.14184928 | 0.22385343 | 0.10451409 | 1.93294469 | 2.37813295 | 2.11447019 | 2.87E-09 | *** | 0.5275133  | 0.05513257 |
| IMP          | C00130 | HK2-ASO1-MET     | 3.84889013 | 0.26445115 | 0.06870842 | 3.91322406 | 4.07523867 | 3.55820765 | 2.87E-09 | *** | 0.94793819 | 0.06513133 |
| IMP          | C00130 | HK2-ASO1-MET-PER | 3.72838667 | 0.31759941 | 0.08518414 | 3.75239858 | 4.03329861 | 3.3994628  | 2.87E-09 | *** | 0.91825955 | 0.07822115 |
| Inosine      | C00294 | Ctrl             | 0.21630726 | 0.10679852 | 0.49373528 | 0.1407893  | 0.29182522 | NA         | 5.30E-07 | *** | 1          | 0.49373528 |
| Inosine      | C00294 | HK2-ASO1         | 0.21079883 | 0.00350842 | 0.01664345 | 0.21327966 | NA         | 0.208318   | 5.30E-07 | *** | 0.97453424 | 0.01621962 |
| Inosine      | C00294 | DPI              | 0.17711623 | 0.00768298 | 0.04337815 | NA         | 0.18254892 | 0.17168355 | 5.30E-07 | *** | 0.818      |            |

|                |        |                  |            |            |            |            |            |            |           |          |            |            |   |
|----------------|--------|------------------|------------|------------|------------|------------|------------|------------|-----------|----------|------------|------------|---|
| Inosine        | C00294 | HK2-ASO1-MET     | 0          | 0          | NA         | 0          | 0          | 0          | 0         | 5.30E-07 | ***        | 0          | 0 |
| Inosine        | C00294 | HK2-ASO1-MET-PER | 0          | 0          | NA         | 0          | 0          | 0          | 0         | 5.30E-07 | ***        | 0          | 0 |
| Inositol       | C00137 | Ctrl             | 1421.8363  | 45.5569521 | 0.03204093 | 1375.50658 | 1423.42331 | 1466.57901 | 5.18E-10  | ***      | 1          | 0.03204093 |   |
| Inositol       | C00137 | HK2-ASO1         | 1604.14224 | 135.934207 | 0.0847395  | 1673.13912 | 1447.54678 | 1691.74082 | 5.18E-10  | ***      | 1.12821866 | 0.09560468 |   |
| Inositol       | C00137 | DPI              | 1655.23705 | 103.110325 | 0.06229339 | 1568.74243 | 1627.62713 | 1769.34161 | 5.18E-10  | ***      | 1.16415445 | 0.07251913 |   |
| Inositol       | C00137 | MET              | 1606.40817 | 87.2421238 | 0.05430881 | 1688.48863 | 1615.94745 | 1514.78843 | 5.18E-10  | ***      | 1.12981232 | 0.06135877 |   |
| Inositol       | C00137 | PER              | 1172.14999 | 15.1059887 | 0.01288742 | 1161.02311 | 1189.3468  | 1166.08006 | 5.18E-10  | ***      | 0.82439166 | 0.01062428 |   |
| Inositol       | C00137 | HK2-ASO1-DPI     | 1718.12279 | 95.8059736 | 0.05576201 | 1696.91019 | 1634.70088 | 1822.7573  | 5.18E-10  | ***      | 1.20838298 | 0.06738186 |   |
| Inositol       | C00137 | HK2-ASO1-DPI-PER | 941.42153  | 96.6660461 | 0.10268094 | 1034.22442 | 841.307497 | 948.73267  | 5.18E-10  | ***      | 0.66211668 | 0.06798676 |   |
| Inositol       | C00137 | HK2-ASO1-MET     | 1166.97094 | 110.319157 | 0.09453462 | 1157.43524 | 1061.72915 | 1281.74842 | 5.18E-10  | ***      | 0.82074915 | 0.07758921 |   |
| Inositol       | C00137 | HK2-ASO1-MET-PER | 788.959154 | 70.6281727 | 0.0895207  | 846.343762 | 810.452443 | 710.081256 | 5.18E-10  | ***      | 0.55488747 | 0.04967391 |   |
| Isobutyryl-CoA | C00630 | Ctrl             | 0.04846467 | 0.01296009 | 0.26741312 | 0.06340511 | 0.04173708 | 0.04025183 | 3.85E-06  | ***      | 1          | 0.26741312 |   |
| Isobutyryl-CoA | C00630 | HK2-ASO1         | 0.01452479 | 0.00937616 | 0.64552785 | 0.02395116 | 0.00519966 | 0.01442355 | 3.85E-06  | ***      | 0.29969855 | 0.19346376 |   |
| Isobutyryl-CoA | C00630 | DPI              | 0.05427356 | 0.01750982 | 0.32262152 | 0.0340935  | 0.06328306 | 0.06544412 | 3.85E-06  | ***      | 1.11985809 | 0.36129032 |   |
| Isobutyryl-CoA | C00630 | MET              | 0.02612392 | 0.00870487 | 0.33321453 | 0.03326176 | 0.01642612 | 0.02868388 | 3.85E-06  | ***      | 0.53903005 | 0.17961265 |   |
| Isobutyryl-CoA | C00630 | PER              | 0.05774789 | 0.01826178 | 0.31623289 | 0.06634139 | 0.07012766 | 0.03677461 | 3.85E-06  | ***      | 1.19154595 | 0.37680602 |   |
| Isobutyryl-CoA | C00630 | HK2-ASO1-DPI     | 0.00922345 | 0.00504296 | 0.54675408 | 0.0074119  | 0.0053365  | 0.01492194 | 3.85E-06  | ***      | 0.19039128 | 0.1040543  |   |
| Isobutyryl-CoA | C00630 | HK2-ASO1-DPI-PER | 0.0014956  | 3.23E-05   | 0.02159673 | 0.00151844 | 0.00147276 | NA         | 3.85E-06  | ***      | 0.03085951 | 0.00066646 |   |
| Isobutyryl-CoA | C00630 | HK2-ASO1-MET     | 0          | 0          | NA         | 0          | 0          | 0          | 3.85E-06  | ***      | 0          | 0          |   |
| Isobutyryl-CoA | C00630 | HK2-ASO1-MET-PER | 0          | 0          | NA         | 0          | 0          | 0          | 3.85E-06  | ***      | 0          | 0          |   |
| Lac            | C00186 | Ctrl             | 276.65971  | 16.7236315 | 0.06044838 | 272.293843 | 295.133262 | 262.552025 | 1.45E-12  | ***      | 1          | 0.06044838 |   |
| Lac            | C00186 | HK2-ASO1         | 55.933517  | 3.74362929 | 0.06692998 | NA         | 53.2863714 | 58.5806627 | 1.45E-12  | ***      | 0.20217442 | 0.01353153 |   |
| Lac            | C00186 | DPI              | 772.537367 | 127.045521 | 0.16445227 | 628.584592 | 820.044116 | 868.983394 | 1.45E-12  | ***      | 2.79237395 | 0.45921223 |   |
| Lac            | C00186 | MET              | 726.488682 | 75.3737299 | 0.10375073 | 812.684249 | 672.953354 | 693.828442 | 1.45E-12  | ***      | 2.62592874 | 0.27244032 |   |
| Lac            | C00186 | PER              | 331.923798 | 14.2706965 | 0.04299389 | 315.567335 | 341.834764 | 338.369295 | 1.45E-12  | ***      | 1.19975474 | 0.05158213 |   |
| Lac            | C00186 | HK2-ASO1-DPI     | 82.9526659 | 13.6256132 | 0.16425769 | 98.6304652 | 76.25932   | 73.9682126 | 1.45E-12  | ***      | 0.29983645 | 0.04925044 |   |
| Lac            | C00186 | HK2-ASO1-DPI-PER | 49.0653043 | 2.02498312 | 0.04127118 | 49.1179497 | 47.0145118 | 51.0634514 | 1.45E-12  | ***      | 0.17734893 | 0.0073194  |   |
| Lac            | C00186 | HK2-ASO1-MET     | 53.6493759 | 14.8617916 | 0.27701705 | 70.5774036 | 42.7452266 | 47.6254976 | 1.45E-12  | ***      | 0.19391828 | 0.05371867 |   |
| Lac            | C00186 | HK2-ASO1-MET-PER | 49.6039356 | 1.75384441 | 0.03535696 | 51.2207092 | 49.8517223 | 47.7393753 | 1.45E-12  | ***      | 0.17929584 | 0.00633936 |   |
| Leu/Ile        | C00123 | Ctrl             | 18659.4834 | 945.521214 | 0.05067272 | 17649.2927 | 18805.9056 | 19523.2519 | 2.02E-07  | ***      | 1          | 0.05067242 |   |
| Leu/Ile        | C00123 | HK2-ASO1         | 24311.5164 | 990.056492 | 0.04072377 | NA         | 23611.4408 | 25011.5921 | 2.02E-07  | ***      | 1.30290405 | 0.05305916 |   |
| Leu/Ile        | C00123 | DPI              | 23249.6923 | 2591.17196 | 0.11144973 | 20880.0661 | 22852.4731 | 26016.5376 | 2.02E-07  | ***      | 1.24599871 | 0.13886622 |   |
| Leu/Ile        | C00123 | MET              | 21410.6024 | 1236.92654 | 0.05777168 | 22838.8525 | 20688.5122 | 20704.4425 | 2.02E-07  | ***      | 1.14743811 | 0.06628943 |   |
| Leu/Ile        | C00123 | PER              | 21058.5647 | 322.581282 | 0.01531829 | 20915.046  | 21427.9991 | 20832.6488 | 2.02E-07  | ***      | 1.12857169 | 0.01728779 |   |
| Leu/Ile        | C00123 | HK2-ASO1-DPI     | 30159.4341 | 1607.2421  | 0.05329152 | 28814.5659 | 29724.2924 | 31939.4441 | 2.02E-07  | ***      | 1.61630595 | 0.0861354  |   |
| Leu/Ile        | C00123 | HK2-ASO1-DPI-PER | 19818.2388 | 2356.28835 | 0.11889494 | 21933.0868 | 17278.3647 | 20243.2649 | 2.02E-07  | ***      | 1.06210008 | 0.12627833 |   |
| Leu/Ile        | C00123 | HK2-ASO1-MET     | 17834.6979 | 2323.26825 | 0.13026676 | 17698.0072 | 15582.7928 | 20223.2937 | 2.02E-07  | ***      | 0.95579805 | 0.12450871 |   |
| Leu/Ile        | C00123 | HK2-ASO1-MET-PER | 14275.6006 | 644.538121 | 0.04514963 | 14470.7685 | 14799.9985 | 13556.0347 | 2.02E-07  | ***      | 0.76505873 | 0.03454212 |   |
| Lys            | C00047 | Ctrl             | 104.004825 | 4.96137337 | 0.0477033  | 98.6063477 | 105.043473 | 108.364654 | 8.82E-06  | ***      | 1          | 0.0477033  |   |
| Lys            | C00047 | HK2-ASO1         | 168.236825 | 8.57298569 | 0.05095784 | NA         | 174.298841 | 162.174809 | 8.82E-06  | ***      | 1.61758674 | 0.08242873 |   |
| Lys            | C00047 | DPI              | 160.131771 | 28.3251969 | 0.1768868  | 128.572226 | 168.47426  | 183.348825 | 8.82E-06  | ***      | 1.53965714 | 0.27234503 |   |
| Lys            | C00047 | MET              | 174.239125 | 23.2448074 | 0.13340751 | 194.691943 | 148.96005  | 179.065381 | 8.82E-06  | ***      | 1.67529848 | 0.2234974  |   |
| Lys            | C00047 | PER              | 117.304646 | 2.51175967 | 0.02141228 | 120.172087 | 116.248098 | 115.493745 | 8.82E-06  | ***      | 1.12787694 | 0.02415041 |   |
| Lys            | C00047 | HK2-ASO1-DPI     | 279.003825 | 32.3008343 | 0.08351439 | 304.171719 | 274.657701 | 258.182056 | 8.82E-06  | ***      | 2.68260464 | 0.22403609 |   |
| Lys            | C00047 | HK2-ASO1-DPI-PER | 192.10835  | 20.5275521 | 0.10685403 | 206.459688 | 168.595309 | 201.270055 | 8.82E-06  | ***      | 1.84710998 | 0.19737115 |   |
| Lys            | C00047 | HK2-ASO1-MET     | 215.726886 | 48.7050969 | 0.22577203 | 252.578842 | 160.509109 | 234.092706 | 8.82E-06  | ***      | 2.07420075 | 0.46829652 |   |
| Lys            | C00047 | HK2-ASO1-MET-PER | 180.807949 | 25.3689397 | 0.14030876 | 170.334514 | 209.736722 | 162.352612 | 8.82E-06  | ***      | 1.73845732 | 0.2439208  |   |
| Mal            | C00149 | Ctrl             | 2051.40572 | 30.9866717 | 0.01510509 | 2084.61173 | 2046.3437  | 2023.26173 | 3.06E-15  | ***      | 1          | 0.01510509 |   |
| Mal            | C00149 | HK2-ASO1         | 1255.05377 | 135.937301 | 0.10831193 | 1409.92252 | 1155.46763 | 1199.77115 | 3.06E-15  | ***      | 0.61180183 | 0.06626544 |   |
| Mal            | C00149 | DPI              | 3214.23738 | 97.7177491 | 0.03040153 | 3182.09863 | 3323.97683 | 3136.63667 | 3.06E-15  | ***      | 1.56684626 | 0.04763453 |   |
| Mal            | C00149 | MET              | 3192.3894  | 114.574333 | 0.03588984 | 3314.39704 | 3175.69    | 3087.08117 | 3.06E-15  | ***      | 1.55619601 | 0.05585162 |   |
| Mal            | C00149 | PER              | 2238.63656 | 208.151254 | 0.09298126 | 2319.95724 | 2393.85157 | 2002.10086 | 3.06E-15  | ***      | 1.09126953 | 0.10146762 |   |
| Mal            | C00149 | HK2-ASO1-DPI     | 1333.28768 | 69.879145  | 0.05241115 | 1408.67803 | 1320.49864 | 1270.68636 | 3.06E-15  | ***      | 0.64993856 | 0.03406403 |   |
| Mal            | C00149 | HK2-ASO1-DPI-PER | 1045.93265 | 54.6753867 | 0.05227429 | 1066.64229 | 983.927747 | 1087.22791 | 3.06E-15  | ***      | 0.50986143 | 0.02665264 |   |
| Mal            | C00149 | HK2-ASO1-MET     | 1123.00921 | 168.346073 | 0.14990623 | 1296.66843 | 960.534001 | 1111.82519 | 3.06E-15  | ***      | 0.54743398 | 0.08206376 |   |
| Mal            | C00149 | HK2-ASO1-MET-PER | 981.126561 | 96.2749726 | 0.09812697 | 997.064296 | 1068.43813 | 877.877256 | 3.06E-15  | ***      | 0.47827036 | 0.04693122 |   |
| Malonyl-CoA    | C00083 | Ctrl             | 0.00041055 | NA         | NA         | 0.00041055 | NA         | NA         | 1.08E-232 | ***      | 1          | NA         |   |
| Malonyl-CoA    | C00083 | HK2-ASO1         | 0          | 0          | NA         | 0          | 0          | 0          | 1.08E-232 | ***      | 0          | 0          |   |
| Malonyl-CoA    | C00083 | DPI              | 0          | 0          | NA         | 0          | 0          | 0          | 1.08E-232 | ***      | 0          | 0          |   |
| Malonyl-CoA    | C00083 | MET              | 0          | 0          | NA         | 0          | 0          | 0          | 1.08E-232 | ***      | 0          | 0          |   |
| Malonyl-CoA    | C00083 | PER              | 0          | 0          | NA         | 0          | 0          | 0          | 1.08E-232 | ***      | 0          | 0          |   |
| Malonyl-CoA    | C00083 | HK2-ASO1-DPI     | 0          | 0          | NA         | 0          | 0          | 0          | 1.08E-232 | ***      | 0          | 0          |   |
| Malonyl-CoA    | C00083 | HK2-ASO1-DPI-PER | 0          | 0          | NA         | 0          | 0          | 0          | 1.08E-232 | ***      | 0          | 0          |   |
| Malonyl-CoA    | C00083 | HK2-ASO1-MET     | 0          | 0          | NA         | 0          | 0          | 0          | 1.08E-232 | ***      | 0          | 0          |   |
| Malonyl-CoA    | C00083 | HK2-ASO1-MET-PER | 0          | 0          | NA         | 0          | 0          | 0          | 1.08E-232 | ***      | 0          | 0          |   |
| Met            | C00073 | Ctrl             | 1735.78723 | 109.397538 | 0.06302474 | 1617.19538 | 1757.40293 | 1832.7634  | 8.92E-08  | ***      | 1          | 0.06302474 |   |
| Met            | C00073 | HK2-ASO1         | 2236.43819 | 178.678148 | 0.07989407 | NA         | 2110.09366 | 2362.78272 | 8.92E-08  | ***      | 1.28842876 | 0.10293782 |   |
| Met            | C00073 | DPI              | 2251.87348 | 196.848315 | 0.08741535 | 2122.8246  | 2154.35147 | 2478.44436 | 8.92E-08  | ***      | 1.29732114 | 0.11340579 |   |
| Met            | C00073 | MET              | 2507.38037 | 140.549686 | 0.05605439 | 2657.75665 | 2485.05474 | 2379.32972 | 8.92E-08  | ***      | 1.44452057 | 0.08097172 |   |
| Met            | C00073 | PER              | 2003.28003 | 35.3034555 | 0.01762283 | 2013.97584 | 2031.99873 | 1963.86551 | 8.92E-08  | ***      | 1.1541046  | 0.02033858 |   |
| Met            | C00073 | HK2-ASO1-DPI     | 3053.4426  | 181.059805 | 0.05929694 | 2957.29422 | 2940.7397  | 3262.29387 | 8.92E-08  | ***      | 1.7591111  | 0.10430991 |   |
| Met            | C00073 | HK2-ASO1-DPI-PER | 1917.99718 | 218.572311 | 0.11395862 | 2083.65109 | 1670.2674  | 2000.07305 | 8.92E-08  | ***      | 1.10497251 | 0.12592114 |   |
| Met            | C00073 | HK2-ASO1-MET     | 1889.18725 | 219.456417 | 0.11616446 | 1840.3361  | 1698.27287 | 2128.95277 | 8.92E-08  | ***      | 1.08837489 | 0.12643048 |   |
| Met            | C00073 | HK2-ASO1-MET-PER | 1482.16673 | 112.839242 | 0.07613127 | 1571.16849 | 1520.07767 | 1355.25402 | 8.92E-08  | ***      | 0.85388733 | 0.06500753 |   |
| NAD+           | C00003 | Ctrl             | 2.42435391 | 1.13323212 | 0.46743675 | 2.080233   | 3.68975815 | 1.50307058 | 4.84E-08  | ***      | 1          | 0.46743675 |   |
| NAD+           | C00003 | HK2-ASO1         | 7.19237684 | 1.16417914 | 0.16186292 | 7.64803782 | 5.86928709 | 8.05980562 | 4.84E-08  | ***      | 2.96671902 | 0.48020181 |   |
| NAD+           | C00003 | DPI              | 3.71645487 | 0.55381208 | 0.14901623 | 3.43337306 | 3.36140103 | 4.35459051 | 4.84E-08  | ***      | 1.53296713 | 0.22843698 |   |
| NAD+           | C00003 | MET              | 6.94416042 | 1.00003194 | 0.14401049 | 8.06762842 | 6.61357275 | 6.15128009 | 4.84E-08  | ***      | 2.86433445 | 0.41249421 |   |
| NAD+           | C000   |                  |            |            |            |            |            |            |           |          |            |            |   |

|              |        |                  |            |            |            |            |            |            |            |     |            |            |
|--------------|--------|------------------|------------|------------|------------|------------|------------|------------|------------|-----|------------|------------|
| Nicotinamide | C00153 | Ctrl             | 731.720178 | 172.641984 | 0.2359399  | 535.515369 | 860.367787 | 799.277378 | 2.04E-05   | *** | 1          | 0.2359399  |
| Nicotinamide | C00153 | HK2-ASO1         | 1137.09799 | 382.54103  | 0.3364187  | 1574.10565 | 974.324512 | 862.863817 | 2.04E-05   | *** | 1.55400661 | 0.52279689 |
| Nicotinamide | C00153 | DPI              | 993.969103 | 276.100507 | 0.27777574 | 728.57865  | 973.669492 | 1279.65917 | 2.04E-05   | *** | 1.35840057 | 0.37733073 |
| Nicotinamide | C00153 | MET              | 1109.00004 | 184.699118 | 0.16654564 | 1322.03003 | 993.685463 | 1011.28464 | 2.04E-05   | *** | 1.51560675 | 0.25241769 |
| Nicotinamide | C00153 | PER              | 774.201453 | 49.4926535 | 0.06392736 | 772.818174 | 824.371246 | 725.414939 | 2.04E-05   | *** | 1.05805672 | 0.06763877 |
| Nicotinamide | C00153 | HK2-ASO1-DPI     | 779.256277 | 219.985501 | 0.28230187 | 1029.15295 | 693.771369 | 614.844517 | 2.04E-05   | *** | 1.06496486 | 0.30064157 |
| Nicotinamide | C00153 | HK2-ASO1-DPI-PER | 205.846779 | 13.9796712 | 0.06791299 | 221.505559 | 194.621336 | 201.413443 | 2.04E-05   | *** | 0.28131899 | 0.01910521 |
| Nicotinamide | C00153 | HK2-ASO1-MET     | 305.887804 | 105.423253 | 0.34464668 | 376.960503 | 184.761935 | 355.940973 | 2.04E-05   | *** | 0.41803932 | 0.14407591 |
| Nicotinamide | C00153 | HK2-ASO1-MET-PER | 207.769657 | 38.0606402 | 0.18318671 | 202.649971 | 248.131007 | 172.527992 | 2.04E-05   | *** | 0.28394687 | 0.05201529 |
| Ornithine    | C00077 | Ctrl             | 19.2711686 | 0.64949597 | 0.03370112 | 19.7916012 | 18.5433406 | 19.478564  | 0.4937267  |     | 1          | 0.03370112 |
| Ornithine    | C00077 | HK2-ASO1         | 21.3038632 | 18.0084812 | 0.84531528 | 0.53662543 | 32.6076831 | 30.7672811 | 0.4937267  |     | 1.10547854 | 0.9344779  |
| Ornithine    | C00077 | DPI              | 6.9396593  | 10.8648362 | 1.56561522 | 19.4852115 | 0.70569649 | 0.62806991 | 0.4937267  |     | 0.36010579 | 0.5637871  |
| Ornithine    | C00077 | MET              | 27.3268142 | 5.21882532 | 0.19097818 | 31.0204469 | 21.3564138 | 29.603582  | 0.4937267  |     | 1.41801542 | 0.27081001 |
| Ornithine    | C00077 | PER              | 19.1631845 | 0.60164069 | 0.03139565 | 19.8540989 | 18.8805728 | 18.7548819 | 0.4937267  |     | 0.9943966  | 0.03121973 |
| Ornithine    | C00077 | HK2-ASO1-DPI     | 28.525803  | 23.8984131 | 0.83778231 | 1.83644911 | 47.9444357 | 35.7965243 | 0.4937267  |     | 1.48023214 | 1.24011229 |
| Ornithine    | C00077 | HK2-ASO1-DPI-PER | 24.5535091 | 2.91767209 | 0.11882913 | 25.4061673 | 21.3044967 | 26.9498633 | 0.4937267  |     | 1.27410587 | 0.15140087 |
| Ornithine    | C00077 | HK2-ASO1-MET     | 27.1701952 | 11.322623  | 0.4167298  | 38.0484922 | 15.4502074 | 28.0118861 | 0.4937267  |     | 1.4098883  | 0.58754249 |
| Ornithine    | C00077 | HK2-ASO1-MET-PER | 23.3867921 | 6.72804353 | 0.28768561 | 18.2847284 | 31.0116075 | 20.8640404 | 0.4937267  |     | 1.21356377 | 0.34912483 |
| Orotidine    | X00006 | Ctrl             | 90.3006999 | 3.84553746 | 0.04258591 | 91.1444387 | 93.6543089 | 86.1033522 | 4.92E-15   | *** | 1          | 0.04258591 |
| Orotidine    | X00006 | HK2-ASO1         | 56.9789619 | 4.23069471 | 0.07425012 | NA         | 53.987409  | 59.9705148 | 4.92E-15   | *** | 0.63099136 | 0.04685118 |
| Orotidine    | X00006 | DPI              | 78.8334122 | 3.69779347 | 0.04690642 | 82.4935923 | 75.0991195 | 78.9075248 | 4.92E-15   | *** | 0.87300998 | 0.04094978 |
| Orotidine    | X00006 | MET              | 59.8105643 | 6.82771866 | 0.11415573 | 64.0547245 | 63.4424454 | 51.9345229 | 4.92E-15   | *** | 0.66234884 | 0.07561092 |
| Orotidine    | X00006 | PER              | 89.567866  | 7.32993662 | 0.08183668 | 86.8550946 | 97.8674948 | 83.9810086 | 4.92E-15   | *** | 0.99188452 | 0.08117253 |
| Orotidine    | X00006 | HK2-ASO1-DPI     | 32.9159475 | 1.72624409 | 0.052444   | 33.3946654 | 31.0008591 | 34.3522881 | 4.92E-15   | *** | 0.36451487 | 0.01911662 |
| Orotidine    | X00006 | HK2-ASO1-DPI-PER | 15.1700952 | 2.17442866 | 0.14333652 | 17.6486066 | 13.5831674 | 14.2785116 | 4.92E-15   | *** | 0.16799532 | 0.02407986 |
| Orotidine    | X00006 | HK2-ASO1-MET     | 11.1653984 | 1.12610019 | 0.10085625 | 11.796314  | 11.8346035 | 9.86527787 | 4.92E-15   | *** | 0.12364686 | 0.01247056 |
| Orotidine    | X00006 | HK2-ASO1-MET-PER | 9.41911682 | 1.74013761 | 0.1847453  | 10.9603885 | 9.76492177 | 7.53204018 | 4.92E-15   | *** | 0.10430835 | 0.01927048 |
| P-Choline    | C00588 | Ctrl             | 8102.57227 | 380.447538 | 0.04695392 | 7741.37076 | 8499.71501 | 8066.63105 | 2.68E-16   | *** | 1          | 0.04695392 |
| P-Choline    | C00588 | HK2-ASO1         | 6754.3757  | 638.656909 | 0.09455454 | NA         | 6302.77706 | 7205.97433 | 2.68E-16   | *** | 0.83360882 | 0.0788215  |
| P-Choline    | C00588 | DPI              | 7876.09714 | 59.5040665 | 0.00755502 | 7808.33361 | 7900.13957 | 7919.81822 | 2.68E-16   | *** | 0.97204898 | 0.00734385 |
| P-Choline    | C00588 | MET              | 6400.68264 | 415.947406 | 0.06498485 | 6782.97    | 6461.3415  | 5957.73641 | 2.68E-16   | *** | 0.78995687 | 0.05133523 |
| P-Choline    | C00588 | PER              | 8552.76323 | 611.640912 | 0.07151384 | 8150.94294 | 9256.67432 | 8250.67244 | 2.68E-16   | *** | 1.05556149 | 0.07548725 |
| P-Choline    | C00588 | HK2-ASO1-DPI     | 3806.02684 | 62.5951401 | 0.01644632 | 3878.0258  | 3775.52856 | 3764.52615 | 2.68E-16   | *** | 0.46973069 | 0.00772534 |
| P-Choline    | C00588 | HK2-ASO1-DPI-PER | 1282.66448 | 154.625278 | 0.12055006 | 1441.2916  | 1132.37871 | 1274.32311 | 2.68E-16   | *** | 0.15830337 | 0.01908348 |
| P-Choline    | C00588 | HK2-ASO1-MET     | 1317.0568  | 187.808925 | 0.14259744 | 1522.66495 | 1273.97005 | 1154.5354  | 2.68E-16   | *** | 0.16254799 | 0.02317893 |
| P-Choline    | C00588 | HK2-ASO1-MET-PER | 798.471084 | 106.291312 | 0.13311855 | 886.510693 | 828.509455 | 680.393103 | 2.68E-16   | *** | 0.09854538 | 0.01311822 |
| P-Creatine   | C02305 | Ctrl             | 6.44397527 | 0.33768789 | 0.05240366 | 6.11407188 | 6.42891049 | 6.78894343 | 5.92E-14   | *** | 1          | 0.05240366 |
| P-Creatine   | C02305 | HK2-ASO1         | 4.27898217 | 0.34017328 | 0.07949864 | NA         | 4.51952101 | 4.03844334 | 5.92E-14   | *** | 0.66402834 | 0.05278935 |
| P-Creatine   | C02305 | DPI              | 6.49993351 | 1.0410422  | 0.16016198 | 5.9822308  | 7.6392345  | 6.26234294 | 5.92E-14   | *** | 1.00868381 | 0.16155279 |
| P-Creatine   | C02305 | MET              | 4.82076954 | 0.48735301 | 0.10109444 | 4.67065065 | 4.42613633 | 5.36552164 | 5.92E-14   | *** | 0.74810491 | 0.07562925 |
| P-Creatine   | C02305 | PER              | 7.7757884  | 0.38878781 | 0.04999979 | 7.49037175 | 8.21859498 | 7.61839846 | 5.92E-14   | *** | 1.20667571 | 0.06033353 |
| P-Creatine   | C02305 | HK2-ASO1-DPI     | 1.76731267 | 0.37374667 | 0.21147739 | 1.79254724 | 1.38158818 | 2.12780259 | 5.92E-14   | *** | 0.27425814 | 0.0579994  |
| P-Creatine   | C02305 | HK2-ASO1-DPI-PER | 0          | 0          | NA         | 0          | 0          | 0          | 5.92E-14   | *** | 0          | 0          |
| P-Creatine   | C02305 | HK2-ASO1-MET     | 0          | 0          | NA         | 0          | 0          | 0          | 5.92E-14   | *** | 0          | 0          |
| P-Creatine   | C02305 | HK2-ASO1-MET-PER | 0          | 0          | NA         | 0          | 0          | 0          | 5.92E-14   | *** | 0          | 0          |
| P-Eta        | C00346 | Ctrl             | 2.58432255 | 0.14765121 | 0.05713343 | 2.41416377 | 2.66016235 | 2.67864153 | 2.46E-16   | *** | 1          | 0.05713343 |
| P-Eta        | C00346 | HK2-ASO1         | 17.9152552 | 1.84655546 | 0.10302144 | 18.0191311 | 16.0198554 | 19.706779  | 2.46E-16   | *** | 6.93228295 | 0.7141738  |
| P-Eta        | C00346 | DPI              | 8.08309741 | 0.40452164 | 0.05004537 | 8.15091953 | 7.64895157 | 8.44942112 | 2.46E-16   | *** | 3.12774325 | 0.15652908 |
| P-Eta        | C00346 | MET              | 14.2438606 | 0.94950228 | 0.06666046 | 15.0957406 | 14.4156496 | 13.2201916 | 2.46E-16   | *** | 5.51164195 | 0.36740858 |
| P-Eta        | C00346 | PER              | 2.74644357 | 0.38298569 | 0.13944786 | 2.70304018 | 3.14928192 | 2.38700862 | 2.46E-16   | *** | 1.0627325  | 0.14819578 |
| P-Eta        | C00346 | HK2-ASO1-DPI     | 95.2609208 | 2.5340945  | 0.02660162 | 96.1356296 | 92.4053442 | 97.2417885 | 2.46E-16   | *** | 36.8610802 | 0.98056433 |
| P-Eta        | C00346 | HK2-ASO1-DPI-PER | 105.404332 | 9.70293344 | 0.09205441 | 114.140636 | 94.9612594 | 107.111099 | 2.46E-16   | *** | 40.7860589 | 3.75453654 |
| P-Eta        | C00346 | HK2-ASO1-MET     | 118.776818 | 9.58650233 | 0.08071021 | 129.517107 | 115.727379 | 111.085968 | 2.46E-16   | *** | 45.9605237 | 3.70948368 |
| P-Eta        | C00346 | HK2-ASO1-MET-PER | 92.8909554 | 10.6869865 | 0.11504873 | 103.212152 | 93.5895252 | 81.8718213 | 2.46E-16   | *** | 35.9440254 | 4.13531451 |
| P-Ser        | C01005 | Ctrl             | 0.93520403 | 0.90421119 | 0.9668598  | 1.95573254 | 0.61596085 | 0.23391871 | 0.50792981 |     | 1          | 0.9668598  |
| P-Ser        | C01005 | HK2-ASO1         | 30.1368262 | 50.2581128 | 1.66766442 | 88.159963  | 2.05509512 | 0.19542032 | 0.50792981 |     | 32.2248676 | 53.7402652 |
| P-Ser        | C01005 | DPI              | 2.99723752 | 1.78938058 | 0.59700994 | 4.65373274 | 3.23852276 | 1.09945705 | 0.50792981 |     | 3.20490225 | 1.91335849 |
| P-Ser        | C01005 | MET              | 2.71854531 | 1.88932896 | 0.69497292 | 0.65156131 | 4.35639381 | 3.14768081 | 0.50792981 |     | 2.90690075 | 2.02023183 |
| P-Ser        | C01005 | PER              | 1.3613041  | 1.84704838 | 1.35682276 | 0.32128988 | 0.26874632 | 3.4938761  | 0.50792981 |     | 1.45562257 | 1.97502182 |
| P-Ser        | C01005 | HK2-ASO1-DPI     | 1.66868146 | 1.67018678 | 1.0009021  | 1.12087656 | 3.54397588 | 0.34119195 | 0.50792981 |     | 1.78429669 | 1.7859063  |
| P-Ser        | C01005 | HK2-ASO1-DPI-PER | 2.05836473 | 1.38912405 | 0.67486779 | 3.45642689 | 0.67835473 | 2.04031257 | 0.50792981 |     | 2.20097931 | 1.48537004 |
| P-Ser        | C01005 | HK2-ASO1-MET     | 2.56696455 | 0.6701198  | 0.26105534 | 2.34406872 | 3.32012785 | 2.03669707 | 0.50792981 |     | 2.74481766 | 0.71654931 |
| P-Ser        | C01005 | HK2-ASO1-MET-PER | 1.40056082 | 0.85811042 | 0.61269058 | 2.87747421 | 0.57483057 | 1.33910468 | 0.50792981 |     | 1.49759921 | 0.91756493 |
| Palmitate    | C00249 | Ctrl             | 866.87193  | 133.004522 | 0.15343042 | 1001.01694 | 735.038013 | 864.560842 | 0.11720535 |     | 1          | 0.15343042 |
| Palmitate    | C00249 | HK2-ASO1         | 1063.97297 | 142.096279 | 0.13355253 | NA         | 1164.45021 | 963.495728 | 0.11720535 |     | 1.22737043 | 1.16391842 |
| Palmitate    | C00249 | DPI              | 1249.86842 | 399.5813   | 0.31969869 | 1617.18004 | 1308.03248 | 824.39275  | 0.11720535 |     | 1.44181439 | 0.46094617 |
| Palmitate    | C00249 | MET              | 1543.28996 | 264.207532 | 0.1711976  | 1848.31497 | 1385.7348  | 1395.82011 | 0.11720535 |     | 1.78029753 | 0.30478266 |
| Palmitate    | C00249 | PER              | 1574.75675 | 116.771455 | 0.07415206 | 1460.44041 | 1569.99234 | 1693.83748 | 0.11720535 |     | 1.81659677 | 1.13470439 |
| Palmitate    | C00249 | HK2-ASO1-DPI     | 1587.07783 | 239.916156 | 0.15116849 | 1413.3333  | 1487.08279 | 1860.8174  | 0.11720535 |     | 1.83081004 | 0.27676079 |
| Palmitate    | C00249 | HK2-ASO1-DPI-PER | 1733.2609  | 506.201502 | 0.29205153 | 1350.94541 | 1541.51382 | 2307.32347 | 0.11720535 |     | 1.99944287 | 0.58394035 |
| Palmitate    | C00249 | HK2-ASO1-MET     | 1495.37451 | 676.198474 | 0.45219339 | 1144.36577 | 2274.89794 | 1066.85982 | 0.11720535 |     | 1.72502356 | 0.78004426 |
| Palmitate    | C00249 | HK2-ASO1-MET-PER | 1809.68753 | 395.597789 | 0.21860005 | 2029.15088 | 1353.00559 | 2046.90613 | 0.11720535 |     | 2.08760656 | 0.4563509  |
| Pantothenate | C00864 | Ctrl             | 1165.23409 | 108.71811  | 0.09330152 | 1119.58987 | 1086.77896 | 1289.33345 | 1.52E-09   | *** | 1          | 0.09330152 |
| Pantothenate | C00864 | HK2-ASO1         | 881.572074 | 205.914303 | 0.23357625 | 646.097715 | 970.768586 | 1027.84992 | 1.52E-09   | *** | 0.7565622  | 0.17671497 |
| Pantothenate | C00864 | DPI              | 921.180754 |            |            |            |            |            |            |     |            |            |

|               |        |                  |            |            |            |            |            |            |            |     |            |            |
|---------------|--------|------------------|------------|------------|------------|------------|------------|------------|------------|-----|------------|------------|
| PEP           | C00074 | DPI              | 4.14803429 | 0.49460561 | 0.11923855 | 4.12582958 | 3.664905   | 4.6533683  | 0.00062432 | *** | 0.7381434  | 0.08801515 |
| PEP           | C00074 | MET              | 2.91182142 | 0.62896191 | 0.21600291 | 2.27646773 | 2.92480604 | 3.53419049 | 0.00062432 | *** | 0.51815911 | 0.11192388 |
| PEP           | C00074 | PER              | 4.7520386  | 0.28113232 | 0.05916036 | 5.0752936  | 4.56462281 | 4.6161994  | 0.00062432 | *** | 0.84562606 | 0.05002754 |
| PEP           | C00074 | HK2-ASO1-DPI     | 3.26754809 | 0.50004086 | 0.15303244 | 3.50802165 | 2.69270136 | 3.60192127 | 0.00062432 | *** | 0.58146073 | 0.08898235 |
| PEP           | C00074 | HK2-ASO1-DPI-PER | 1.40845231 | 0.43921793 | 0.31184437 | 1.35572343 | 0.99797909 | 1.8716544  | 0.00062432 | *** | 0.25063432 | 0.07715879 |
| PEP           | C00074 | HK2-ASO1-MET     | 2.91913235 | 0.7278813  | 0.24934851 | 3.7089447  | 2.77314088 | 2.27531146 | 0.00062432 | *** | 0.51946009 | 0.1295266  |
| PEP           | C00074 | HK2-ASO1-MET-PER | 3.29239895 | 0.65993844 | 0.20044303 | 2.78676403 | 4.03894583 | 3.051487   | 0.00062432 | *** | 0.58588294 | 0.11743616 |
| Phe           | C00079 | Ctrl             | 3308.42986 | 223.562906 | 0.06757372 | 3129.154   | 3237.20917 | 3558.92642 | 8.74E-08   | *** | 1          | 0.06757372 |
| Phe           | C00079 | HK2-ASO1         | 3980.27277 | 480.561103 | 0.12073572 | NA         | 3640.46475 | 4320.08078 | 8.74E-08   | *** | 1.20307002 | 0.14525353 |
| Phe           | C00079 | DPI              | 4299.46996 | 323.019673 | 0.07513012 | 4241.53024 | 4009.34117 | 4647.53848 | 8.74E-08   | *** | 1.29954998 | 0.09763534 |
| Phe           | C00079 | MET              | 4448.69612 | 197.131261 | 0.04431214 | 4613.98237 | 4501.59293 | 4230.51305 | 8.74E-08   | *** | 1.34465481 | 0.05958454 |
| Phe           | C00079 | PER              | 3951.37709 | 54.1346283 | 0.01370019 | 3905.90905 | 4011.26015 | 3936.96206 | 8.74E-08   | *** | 1.19433606 | 0.01636263 |
| Phe           | C00079 | HK2-ASO1-DPI     | 5592.20426 | 556.881697 | 0.09958179 | 5158.95589 | 5397.32011 | 6220.33678 | 8.74E-08   | *** | 1.6902895  | 0.16832205 |
| Phe           | C00079 | HK2-ASO1-DPI-PER | 3560.46293 | 404.135201 | 0.11350636 | 3951.8835  | 3144.71239 | 3584.79291 | 8.74E-08   | *** | 1.07617906 | 0.12215317 |
| Phe           | C00079 | HK2-ASO1-MET     | 3202.73386 | 55.7627363 | 0.01741098 | 3209.85368 | 3143.75317 | 3254.59475 | 8.74E-08   | *** | 0.96805252 | 0.01685474 |
| Phe           | C00079 | HK2-ASO1-MET-PER | 2525.37391 | 189.102357 | 0.07488093 | 2687.07955 | 2571.59652 | 2317.44566 | 8.74E-08   | *** | 0.76331493 | 0.05715774 |
| Pipicolate    | C00408 | Ctrl             | 15.3035563 | 0.30723464 | 0.02007603 | 15.089215  | 15.6555463 | 15.1659077 | 0.00023202 | *** | 1          | 0.02007603 |
| Pipicolate    | C00408 | HK2-ASO1         | 24.7822405 | 0.21812712 | 0.00880175 | NA         | 24.9364797 | 24.6280014 | 0.00023202 | *** | 1.61937788 | 0.01425336 |
| Pipicolate    | C00408 | DPI              | 24.9444827 | 6.00270901 | 0.24064275 | 18.0345104 | 28.8703483 | 27.9285893 | 0.00023202 | *** | 1.62997947 | 0.39224275 |
| Pipicolate    | C00408 | MET              | 24.1970828 | 4.18035785 | 0.17276289 | 27.6621132 | 19.5541441 | 25.3749912 | 0.00023202 | *** | 1.58114116 | 0.27316251 |
| Pipicolate    | C00408 | PER              | 17.3677109 | 0.92397637 | 0.05320081 | 18.0023766 | 16.3076588 | 17.7930974 | 0.00023202 | *** | 1.13488071 | 0.06037658 |
| Pipicolate    | C00408 | HK2-ASO1-DPI     | 42.0977796 | 5.95275927 | 0.14140316 | 47.7096617 | 42.7291962 | 35.8544809 | 0.00023202 | *** | 2.75084945 | 0.38897822 |
| Pipicolate    | C00408 | HK2-ASO1-DPI-PER | 29.070004  | 1.83904773 | 0.06326273 | 28.7944646 | 27.3842729 | 31.0312744 | 0.00023202 | *** | 1.89955873 | 0.12017127 |
| Pipicolate    | C00408 | HK2-ASO1-MET     | 31.8022646 | 9.93923641 | 0.31252335 | 42.5277008 | 22.9022953 | 29.9767947 | 0.00023202 | *** | 2.07809635 | 0.64947233 |
| Pipicolate    | C00408 | HK2-ASO1-MET-PER | 25.7685139 | 3.81456063 | 0.14803184 | 27.7889607 | 30.0676623 | 24.4489187 | 0.00023202 | *** | 1.6838252  | 0.24925755 |
| PO4           | C00009 | Ctrl             | 85.7166227 | 6.16394335 | 0.07191071 | 78.6865966 | 88.2681795 | 90.1950919 | 0.00072549 | *** | 1          | 0.07191071 |
| PO4           | C00009 | HK2-ASO1         | 154.624206 | 44.0036095 | 0.28458422 | 204.634095 | 137.402315 | 121.836208 | 0.00072549 | *** | 1.80389989 | 0.51336145 |
| PO4           | C00009 | DPI              | 140.113613 | 29.3988293 | 0.20982136 | 106.567003 | 152.385821 | 161.388015 | 0.00072549 | *** | 1.63461425 | 0.34297699 |
| PO4           | C00009 | MET              | 140.463117 | 20.9213218 | 0.1489453  | 161.765527 | 119.944936 | 139.678889 | 0.00072549 | *** | 1.63869169 | 0.24407543 |
| PO4           | C00009 | PER              | 88.6443445 | 6.31134349 | 0.07119849 | 95.1615957 | 82.5613368 | 88.2101011 | 0.00072549 | *** | 1.03415582 | 0.07363033 |
| PO4           | C00009 | HK2-ASO1-DPI     | 204.140971 | 17.0984957 | 0.08375828 | 215.591884 | 212.344477 | 184.486552 | 0.00072549 | *** | 2.38157973 | 0.19947701 |
| PO4           | C00009 | HK2-ASO1-DPI-PER | 178.988876 | 22.8425462 | 0.12761992 | 195.907952 | 153.005338 | 188.053337 | 0.00072549 | *** | 2.08814662 | 0.26648911 |
| PO4           | C00009 | HK2-ASO1-MET     | 208.508245 | 63.1648968 | 0.30293717 | 244.271368 | 135.576221 | 245.677146 | 0.00072549 | *** | 2.43252987 | 0.73690371 |
| PO4           | C00009 | HK2-ASO1-MET-PER | 181.187087 | 28.8896727 | 0.15944664 | 164.047779 | 214.541742 | 164.971741 | 0.00072549 | *** | 2.11379172 | 0.33703699 |
| PPi           | C00013 | Ctrl             | 45.2611911 | 6.90459969 | 0.15255011 | 44.6226308 | 38.6980533 | 52.4628893 | 2.65E-09   | *** | 1          | 0.15255011 |
| PPi           | C00013 | HK2-ASO1         | 40.7431328 | 7.62681898 | 0.18719275 | NA         | 46.1361082 | 35.3501574 | 2.65E-09   | *** | 0.9001781  | 0.16850681 |
| PPi           | C00013 | DPI              | 61.9852213 | 7.44574491 | 0.12012129 | 54.6213873 | 61.8240174 | 69.5102592 | 2.65E-09   | *** | 1.36950044 | 0.16450616 |
| PPi           | C00013 | MET              | 52.637419  | 2.95149089 | 0.0560721  | 51.0878519 | 56.0409722 | 50.7834329 | 2.65E-09   | *** | 1.16297026 | 0.06521019 |
| PPi           | C00013 | PER              | 54.2092145 | 10.1083345 | 0.18646893 | 65.3262051 | 51.730949  | 45.5704894 | 2.65E-09   | *** | 1.19769748 | 0.22333337 |
| PPi           | C00013 | HK2-ASO1-DPI     | 39.5429634 | 3.13608456 | 0.07930828 | 36.0138472 | 42.0103947 | 40.6046482 | 2.65E-09   | *** | 0.87366157 | 0.0692886  |
| PPi           | C00013 | HK2-ASO1-DPI-PER | 10.708631  | 2.86164291 | 0.26722771 | 13.5824602 | 7.85933208 | 10.6841008 | 2.65E-09   | *** | 0.23659632 | 0.06322509 |
| PPi           | C00013 | HK2-ASO1-MET     | 6.47352362 | 0.44671179 | 0.06900597 | NA         | 6.78939656 | 6.15765069 | 2.65E-09   | *** | 0.14302592 | 0.00986934 |
| PPi           | C00013 | HK2-ASO1-MET-PER | 3.70991282 | 0.42437636 | 0.11438985 | 4.14807259 | 3.68085217 | 3.30081371 | 2.65E-09   | *** | 0.08196675 | 0.00937616 |
| Pro           | C00148 | Ctrl             | 6836.31139 | 442.715086 | 0.06475935 | 6362.03117 | 6908.25358 | 7238.64942 | 3.63E-13   | *** | 1          | 0.06475935 |
| Pro           | C00148 | HK2-ASO1         | 8245.07731 | 536.731543 | 0.06509721 | 8765.24188 | 7653.18625 | 8276.80379 | 3.63E-13   | *** | 1.20607106 | 0.07851186 |
| Pro           | C00148 | DPI              | 10276.6062 | 716.581224 | 0.06972936 | 9540.18969 | 10318.0781 | 10971.5509 | 3.63E-13   | *** | 1.50323846 | 0.10481986 |
| Pro           | C00148 | MET              | 8893.79818 | 362.645702 | 0.04077512 | 9309.25326 | 8731.45466 | 8640.68662 | 3.63E-13   | *** | 1.30096446 | 0.05304698 |
| Pro           | C00148 | PER              | 7867.83997 | 443.779132 | 0.05640419 | 7356.18473 | 8148.09319 | 8099.24198 | 3.63E-13   | *** | 1.15088964 | 0.064915   |
| Pro           | C00148 | HK2-ASO1-DPI     | 8583.90313 | 122.314743 | 0.01424932 | 8711.61467 | 8467.81501 | 8572.2797  | 3.63E-13   | *** | 1.25563372 | 0.01789192 |
| Pro           | C00148 | HK2-ASO1-DPI-PER | 4179.44383 | 461.994251 | 0.11053965 | 4588.87552 | 3678.56425 | 4270.89173 | 3.63E-13   | *** | 0.61133949 | 0.06757946 |
| Pro           | C00148 | HK2-ASO1-MET     | 3713.45458 | 599.790273 | 0.16151814 | 4303.36753 | 3104.25233 | 3732.74386 | 3.63E-13   | *** | 0.54319565 | 0.08773595 |
| Pro           | C00148 | HK2-ASO1-MET-PER | 2817.61723 | 165.013088 | 0.05856476 | 2836.97084 | 2972.1001  | 2643.78076 | 3.63E-13   | *** | 0.41215461 | 0.02413774 |
| Pro-OH        | C01157 | Ctrl             | 2551.64453 | 82.326412  | 0.03226606 | 2466.55143 | 2630.89274 | 2557.48941 | 5.28E-08   | *** | 1          | 0.03226606 |
| Pro-OH        | C01157 | HK2-ASO1         | 2871.99256 | 224.500862 | 0.07816903 | 3121.59448 | 2686.57149 | 2807.81171 | 5.28E-08   | *** | 1.12554571 | 0.08798281 |
| Pro-OH        | C01157 | DPI              | 3174.84767 | 470.647371 | 0.1482425  | 2666.27508 | 3263.2292  | 3595.03873 | 5.28E-08   | *** | 1.24423588 | 0.18444864 |
| Pro-OH        | C01157 | MET              | 3207.40219 | 322.837581 | 0.10065391 | 3551.09813 | 2910.5385  | 3160.56995 | 5.28E-08   | *** | 1.25699413 | 0.12652138 |
| Pro-OH        | C01157 | PER              | 2689.25912 | 88.370823  | 0.03286066 | 2648.81081 | 2790.61498 | 2628.35157 | 5.28E-08   | *** | 1.05393173 | 0.03463289 |
| Pro-OH        | C01157 | HK2-ASO1-DPI     | 3007.58011 | 181.14493  | 0.06022946 | 3175.26372 | 3032.02101 | 2815.45561 | 5.28E-08   | *** | 1.17868303 | 0.07099144 |
| Pro-OH        | C01157 | HK2-ASO1-DPI-PER | 1550.25816 | 172.955978 | 0.11156592 | 1684.68272 | 1355.13459 | 1610.95717 | 5.28E-08   | *** | 0.60755256 | 0.06778216 |
| Pro-OH        | C01157 | HK2-ASO1-MET     | 1758.5226  | 368.56336  | 0.20958693 | 1961.4583  | 1333.09214 | 1981.01737 | 5.28E-08   | *** | 0.68917225 | 0.1444415  |
| Pro-OH        | C01157 | HK2-ASO1-MET-PER | 1333.45835 | 121.511119 | 0.0911248  | 1288.88337 | 1470.96196 | 1240.52971 | 5.28E-08   | *** | 0.52258782 | 0.04762071 |
| Propanoyl-CoA | C00100 | Ctrl             | 0.03879539 | 0.00856759 | 0.22084049 | 0.02996654 | 0.04707533 | 0.03934431 | 6.53E-05   | *** | 1          | 0.22084049 |
| Propanoyl-CoA | C00100 | HK2-ASO1         | 0.037961   | 0.01137935 | 0.29976436 | 0.03813379 | 0.02649624 | 0.04925298 | 6.53E-05   | *** | 0.97849244 | 0.29331716 |
| Propanoyl-CoA | C00100 | DPI              | 0.01864985 | 0.00551614 | 0.2957741  | 0.02010931 | 0.02328951 | 0.01255073 | 6.53E-05   | *** | 0.48072327 | 0.14218549 |
| Propanoyl-CoA | C00100 | MET              | 0.01598956 | 0.00081945 | 0.50154308 | 0.02482931 | 0.00918102 | 0.01395834 | 6.53E-05   | *** | 0.41215094 | 0.20671145 |
| Propanoyl-CoA | C00100 | PER              | 0.03359739 | 0.02423151 | 0.72123196 | 0.03182942 | 0.05866446 | 0.01029828 | 6.53E-05   | *** | 0.86601488 | 0.62459761 |
| Propanoyl-CoA | C00100 | HK2-ASO1-DPI     | 0          | 0          | NA         | 0          | 0          | 0          | 6.53E-05   | *** | 0          | 0          |
| Propanoyl-CoA | C00100 | HK2-ASO1-DPI-PER | 0          | 0          | NA         | 0          | 0          | 0          | 6.53E-05   | *** | 0          | 0          |
| Propanoyl-CoA | C00100 | HK2-ASO1-MET     | 0          | 0          | NA         | 0          | 0          | 0          | 6.53E-05   | *** | 0          | 0          |
| Propanoyl-CoA | C00100 | HK2-ASO1-MET-PER | 0          | 0          | NA         | 0          | 0          | 0          | 6.53E-05   | *** | 0          | 0          |
| PRPP          | C00119 | Ctrl             | 9.46154237 | 0.11701222 | 0.01236714 | 9.33045078 | 9.49874902 | 9.5554273  | 6.29E-12   | *** | 1          | 0.01236714 |
| PRPP          | C00119 | HK2-ASO1         | 3.74210048 | 0.46186871 | 0.12342499 | 3.24615391 | 4.15992798 | 3.82021955 | 6.29E-12   | *** | 0.39550639 | 0.04881537 |
| PRPP          | C00119 | DPI              | 12.5879502 | 1.8201772  | 0.14459679 | 14.5889446 | 12.1444822 | 11.0306217 | 6.29E-12   | *** | 1.33043321 | 0.19237637 |
| PRPP          | C00119 | MET              | 7.30699269 | 1.72556061 | 0.23615195 | 6.96199416 | 5.77999455 | 5.77999455 | 6.29E-12   | *** | 0.77228346 | 0.18237625 |
| PRPP          | C00119 | PER              | 6.74537463 | 0.53766    |            |            |            |            |            |     |            |            |

|          |        |                  |            |            |            |            |            |            |                |            |            |
|----------|--------|------------------|------------|------------|------------|------------|------------|------------|----------------|------------|------------|
| Pyr      | C00022 | PER              | 5.13413202 | 8.64387889 | 1.68361056 | 15.1148719 | 0.21632513 | 0.071199   | 0.2964507      | 0.93054294 | 1.56667191 |
| Pyr      | C00022 | HK2-ASO1-DPI     | 0.27933549 | 0.15815497 | 0.56618286 | 0.34351994 | 0.39530832 | 0.09917821 | 0.2964507      | 0.05062855 | 0.02866502 |
| Pyr      | C00022 | HK2-ASO1-DPI-PER | 11.2566077 | 9.77509313 | 0.86838712 | 0.28499332 | 14.4467224 | 19.0381074 | 0.2964507      | 2.0402196  | 1.77170042 |
| Pyr      | C00022 | HK2-ASO1-MET     | 0.34215153 | 0.15337695 | 0.44827199 | 0.19626503 | 0.328141   | 0.50205305 | 0.2964507      | 0.06201373 | 0.02779902 |
| Pyr      | C00022 | HK2-ASO1-MET-PER | 10.1344484 | 14.054914  | 1.38684548 | 20.0727734 | 0.19612341 | NA         | 0.2964507      | 1.83683227 | 2.54740253 |
| R5P      | C00117 | Ctrl             | 3.33423631 | 0.24180541 | 0.07252198 | 3.08919908 | 3.57267484 | 3.34083501 | 7.49E-11 ***   | 1          | 0.07252198 |
| R5P      | C00117 | HK2-ASO1         | 2.15984865 | 0.09962206 | 0.04612455 | 2.04714595 | 2.19624678 | 2.23615321 | 7.49E-11 ***   | 0.64777912 | 0.02987852 |
| R5P      | C00117 | DPI              | 4.49475721 | 0.38069497 | 0.08469756 | 4.91987479 | 4.18532248 | 4.37907435 | 7.49E-11 ***   | 1.34806198 | 0.11417756 |
| R5P      | C00117 | MET              | 2.99823692 | 0.89289912 | 0.29780806 | 4.02926226 | 2.47974126 | 2.48570726 | 7.49E-11 ***   | 0.89922748 | 0.26779719 |
| R5P      | C00117 | PER              | 5.50475424 | 0.53174115 | 0.09659671 | 5.7896818  | 5.83331154 | 4.89126937 | 7.49E-11 ***   | 1.65097903 | 0.15947914 |
| R5P      | C00117 | HK2-ASO1-DPI     | 2.818413   | 0.73134259 | 0.25948737 | 2.35167834 | 2.44228789 | 3.66127278 | 7.49E-11 ***   | 0.84529492 | 0.21934336 |
| R5P      | C00117 | HK2-ASO1-DPI-PER | 0.32697397 | 0.05993835 | 0.18331229 | 0.28484526 | 0.30048325 | 0.39559339 | 7.49E-11 ***   | 0.09806562 | 0.01797663 |
| R5P      | C00117 | HK2-ASO1-MET     | 0.21175034 | 0.09697215 | 0.45795512 | 0.21529152 | 0.3069034  | 0.11305611 | 7.49E-11 ***   | 0.0635079  | 0.02908377 |
| R5P      | C00117 | HK2-ASO1-MET-PER | 0.3727733  | 0.1698928  | 0.45575366 | 0.56211489 | 0.32255343 | 0.23365159 | 7.49E-11 ***   | 0.1118017  | 0.05095404 |
| Rib      | C00121 | Ctrl             | 19.6378673 | 3.86260395 | 0.19669162 | 17.2790289 | 17.5390827 | 24.0954903 | 0.00072689 *** | 1          | 0.19669162 |
| Rib      | C00121 | HK2-ASO1         | 31.514883  | 27.2313585 | 0.86407931 | 0.44547727 | 51.2407557 | 42.8584161 | 0.00072689 *** | 1.60480171 | 1.38667596 |
| Rib      | C00121 | DPI              | 14.5029057 | 5.33404636 | 0.36779156 | 10.5558099 | 12.3816561 | 20.5712521 | 0.00072689 *** | 0.73851735 | 0.27162405 |
| Rib      | C00121 | MET              | 13.5188281 | 2.4418458  | 0.18062555 | 14.0913089 | 10.8416025 | 15.6235728 | 0.00072689 *** | 0.68840612 | 0.12434374 |
| Rib      | C00121 | PER              | 25.0787036 | 6.20085357 | 0.24725575 | 31.8725011 | 19.7237903 | 23.6398192 | 0.00072689 *** | 1.27705841 | 0.31576003 |
| Rib      | C00121 | HK2-ASO1-DPI     | 65.0369839 | 11.9423127 | 0.18362341 | 51.9275944 | 67.8867139 | 75.2966433 | 0.00072689 *** | 3.31181502 | 0.60812676 |
| Rib      | C00121 | HK2-ASO1-DPI-PER | 40.4305358 | 8.97351814 | 0.22194903 | 47.9805171 | 30.5096225 | 42.8014677 | 0.00072689 *** | 2.05880481 | 0.45694973 |
| Rib      | C00121 | HK2-ASO1-MET     | 50.8618353 | 16.6624578 | 0.32760237 | 39.9976133 | 42.5420733 | 70.0458192 | 0.00072689 *** | 2.59898772 | 0.84848612 |
| Rib      | C00121 | HK2-ASO1-MET-PER | 43.9449605 | 6.66041762 | 0.15156272 | 39.6397421 | 51.6166261 | 40.5785132 | 0.00072689 *** | 2.23776644 | 0.31861696 |
| S7P      | C05382 | Ctrl             | 3.03355457 | 0.27457824 | 0.0905137  | 3.22659596 | 2.71921634 | 3.1548514  | 1.26E-20 ***   | 1          | 0.0905137  |
| S7P      | C05382 | HK2-ASO1         | 0          | 0          | NA         | 0          | 0          | 0          | 1.26E-20 ***   | 0          | 0          |
| S7P      | C05382 | DPI              | 7.92016122 | 0.33284223 | 0.04202468 | 7.54648567 | 8.18483784 | 8.02916016 | 1.26E-20 ***   | 2.61085174 | 0.10972021 |
| S7P      | C05382 | MET              | 6.62417071 | 0.41911616 | 0.06327074 | 6.65225404 | 6.19171913 | 7.02853895 | 1.26E-20 ***   | 2.18363328 | 0.13816009 |
| S7P      | C05382 | PER              | 3.09335918 | 0.1860724  | 0.06015221 | 2.89521401 | 3.26438179 | 3.12048175 | 1.26E-20 ***   | 1.01971437 | 0.06133807 |
| S7P      | C05382 | HK2-ASO1-DPI     | 0          | 0          | NA         | 0          | 0          | 0          | 1.26E-20 ***   | 0          | 0          |
| S7P      | C05382 | HK2-ASO1-DPI-PER | 0          | 0          | NA         | 0          | 0          | 0          | 1.26E-20 ***   | 0          | 0          |
| S7P      | C05382 | HK2-ASO1-MET     | 0          | 0          | NA         | 0          | 0          | 0          | 1.26E-20 ***   | 0          | 0          |
| S7P      | C05382 | HK2-ASO1-MET-PER | 0          | 0          | NA         | 0          | 0          | 0          | 1.26E-20 ***   | 0          | 0          |
| SAM      | C00019 | Ctrl             | 186.553254 | 9.20241783 | 0.04932864 | 183.5784   | 196.875113 | 179.206251 | 1.40E-08 ***   | 1          | 0.04932864 |
| SAM      | C00019 | HK2-ASO1         | 203.032894 | 24.2000934 | 0.11919297 | 187.606525 | 190.567752 | 230.924406 | 1.40E-08 ***   | 1.08833746 | 0.12972217 |
| SAM      | C00019 | DPI              | 210.091369 | 9.95409442 | 0.04737984 | 208.713843 | 200.897783 | 220.662481 | 1.40E-08 ***   | 1.1261737  | 0.05335792 |
| SAM      | C00019 | MET              | 205.428348 | 22.2064777 | 0.10809841 | 226.654701 | 207.273467 | 182.356876 | 1.40E-08 ***   | 1.10117804 | 0.1190356  |
| SAM      | C00019 | PER              | 197.987615 | 14.3680764 | 0.07257058 | 200.367407 | 211.017216 | 182.578224 | 1.40E-08 ***   | 1.06129274 | 0.07701863 |
| SAM      | C00019 | HK2-ASO1-DPI     | 351.001014 | 19.4302048 | 0.05535655 | 373.047309 | 336.371831 | 343.583901 | 1.40E-08 ***   | 1.88150571 | 0.10415366 |
| SAM      | C00019 | HK2-ASO1-DPI-PER | 347.995648 | 32.735126  | 0.09406763 | 384.731824 | 321.918573 | 337.336546 | 1.40E-08 ***   | 1.86539575 | 0.17547336 |
| SAM      | C00019 | HK2-ASO1-MET     | 281.167118 | 27.5447148 | 0.09796561 | 312.965525 | 264.667793 | 265.868222 | 1.40E-08 ***   | 1.50716845 | 0.14765068 |
| SAM      | C00019 | HK2-ASO1-MET-PER | 185.513028 | 28.4920843 | 0.15358535 | 213.312349 | 186.851386 | 156.37535  | 1.40E-08 ***   | 0.99442397 | 0.15272896 |
| Sarc     | C00213 | Ctrl             | 221.460733 | 22.8929072 | 0.10337231 | 195.684716 | 229.271058 | 239.426427 | 1.96E-13 ***   | 1          | 0.10337231 |
| Sarc     | C00213 | HK2-ASO1         | 149.152254 | 13.7874011 | 0.09243844 | 164.803886 | 143.848785 | 138.804091 | 1.96E-13 ***   | 0.673493   | 0.06225664 |
| Sarc     | C00213 | DPI              | 234.605164 | 31.0641059 | 0.13241015 | 198.751162 | 253.46532  | 251.598552 | 1.96E-13 ***   | 1.05935332 | 0.14026914 |
| Sarc     | C00213 | MET              | 169.482507 | 20.8025472 | 0.12274156 | 193.503119 | 157.411834 | 157.53257  | 1.96E-13 ***   | 0.76529371 | 0.09393334 |
| Sarc     | C00213 | PER              | 217.541712 | 13.731025  | 0.06311904 | 227.516278 | 223.227858 | 201.881001 | 1.96E-13 ***   | 0.98230377 | 0.06200207 |
| Sarc     | C00213 | HK2-ASO1-DPI     | 70.4072652 | 6.67784099 | 0.09484591 | 77.6465648 | 69.0871731 | 64.4880576 | 1.96E-13 ***   | 0.31792212 | 0.03015361 |
| Sarc     | C00213 | HK2-ASO1-DPI-PER | 15.5141264 | 1.46603771 | 0.09449696 | 16.2089916 | 12.3829549 | 16.503533  | 1.96E-13 ***   | 0.07005362 | 0.00661985 |
| Sarc     | C00213 | HK2-ASO1-MET     | 17.1196291 | 4.22747356 | 0.24693722 | 21.1420964 | 17.5034635 | 12.7133276 | 1.96E-13 ***   | 0.07730323 | 0.01908904 |
| Sarc     | C00213 | HK2-ASO1-MET-PER | 10.5611866 | 0.92878197 | 0.08794296 | 9.63893791 | 11.4963668 | 10.548255  | 1.96E-13 ***   | 0.04768875 | 0.00419389 |
| Ser      | C00065 | Ctrl             | 15.0386123 | 1.09533413 | 0.07283479 | 14.4347469 | 16.3029725 | 14.3781175 | 0.00071011 *** | 1          | 0.07283479 |
| Ser      | C00065 | HK2-ASO1         | 20.1205589 | 13.8321424 | 0.68746313 | 36.0812555 | 12.6601017 | 11.6203194 | 0.00071011 *** | 1.33792657 | 0.91977519 |
| Ser      | C00065 | DPI              | 33.8267104 | 7.58727652 | 0.22429839 | 25.079881  | 37.7682724 | 38.6319777 | 0.00071011 *** | 2.24932392 | 0.50451972 |
| Ser      | C00065 | MET              | 42.7320489 | 6.51597187 | 0.15248442 | 46.1761825 | 35.2167665 | 46.8031977 | 0.00071011 *** | 2.84148883 | 0.43382729 |
| Ser      | C00065 | PER              | 16.6352503 | 0.26172789 | 0.01573333 | 16.9369158 | 16.5002273 | 16.4686079 | 0.00071011 *** | 1.10616924 | 0.01740373 |
| Ser      | C00065 | HK2-ASO1-DPI     | 21.1915988 | 2.17630099 | 0.1026964  | 23.4204399 | 21.0824077 | 19.0719487 | 0.00071011 *** | 1.40914589 | 0.14471422 |
| Ser      | C00065 | HK2-ASO1-DPI-PER | 17.2546052 | 1.85251791 | 0.10736368 | 17.1456368 | 15.458966  | 19.1591932 | 0.00071011 *** | 1.14735355 | 0.1231841  |
| Ser      | C00065 | HK2-ASO1-MET     | 23.3935315 | 8.54518794 | 0.36527995 | 30.7827881 | 14.0359179 | 25.3618884 | 0.00071011 *** | 1.5555645  | 0.56821652 |
| Ser      | C00065 | HK2-ASO1-MET-PER | 16.8433807 | 2.98461963 | 0.17719837 | 14.1543747 | 20.0546695 | 16.321098  | 0.00071011 *** | 1.12000897 | 0.19846377 |
| Sorbitol | C00794 | Ctrl             | 63.6966688 | 10.8235632 | 0.16992354 | 72.8531503 | 66.4851543 | 51.7517019 | 1.18E-12 ***   | 1          | 0.16992354 |
| Sorbitol | C00794 | HK2-ASO1         | 341.467308 | 63.1809632 | 0.18502785 | 272.125472 | 356.501107 | 395.775346 | 1.18E-12 ***   | 5.36083463 | 0.99190373 |
| Sorbitol | C00794 | DPI              | 80.4377544 | 6.88971261 | 0.08565272 | 80.574963  | 73.4804623 | 87.257838  | 1.18E-12 ***   | 1.26282153 | 0.10816441 |
| Sorbitol | C00794 | MET              | 73.1365736 | 7.06782722 | 0.09663875 | 80.4392836 | 66.3297469 | 72.6406903 | 1.18E-12 ***   | 1.14820092 | 0.1109607  |
| Sorbitol | C00794 | PER              | 68.2699912 | 4.67269425 | 0.06844434 | 72.9711303 | 68.2125724 | 63.6262709 | 1.18E-12 ***   | 1.07179845 | 0.07335853 |
| Sorbitol | C00794 | HK2-ASO1-DPI     | 523.825659 | 16.3582523 | 0.03122843 | 520.895529 | 509.130489 | 541.450958 | 1.18E-12 ***   | 8.2237528  | 0.25681488 |
| Sorbitol | C00794 | HK2-ASO1-DPI-PER | 405.623452 | 18.0220633 | 0.04443053 | 424.05315  | 388.03875  | 404.778455 | 1.18E-12 ***   | 6.36804811 | 0.28293573 |
| Sorbitol | C00794 | HK2-ASO1-MET     | 335.835132 | 63.2718501 | 0.18840152 | 407.553804 | 287.907198 | 312.044394 | 1.18E-12 ***   | 5.27241279 | 0.9933306  |
| Sorbitol | C00794 | HK2-ASO1-MET-PER | 354.376026 | 37.448153  | 0.10567349 | 372.844661 | 379.002398 | 311.281019 | 1.18E-12 ***   | 5.56349386 | 0.58791384 |
| Succ     | C00042 | Ctrl             | 79.5953361 | 12.9317107 | 0.1624682  | 93.876034  | 76.2332659 | 68.6767082 | 4.47E-05 ***   | 1          | 0.1624682  |
| Succ     | C00042 | HK2-ASO1         | 86.4919248 | 18.0807462 | 0.20904548 | 69.1996577 | 105.26952  | 85.006597  | 4.47E-05 ***   | 1.08664564 | 0.22715836 |
| Succ     | C00042 | DPI              | 70.3838214 | 3.11067774 | 0.04419592 | 68.0477925 | 69.1888837 | 73.914788  | 4.47E-05 ***   | 0.88427067 | 0.03908116 |
| Succ     | C00042 | MET              | 55.6644914 | 2.66301637 | 0.04784049 | 52.7939449 | 58.0545569 | 56.1449724 | 4.47E-05 ***   | 0.69934363 | 0.03345694 |
| Succ     | C00042 | PER              | 102.709397 | 5.0607609  | 0.04927262 | 108.551108 | 99.9193449 | 99.657738  | 4.47E-05 ***   | 1.29039467 | 0.06358112 |
| Succ     | C00042 | HK2-ASO1-DPI     | 112.256575 | 7.36506521 | 0.06560921 | 113.663189 | 118.816894 | 104.289642 | 4.47E-05 ***   | 1.41034111 | 0.09253137 |
| Succ     | C00042 | HK2-ASO1-DPI-PER | 90.0012785 | 8.95683094 | 0.09951893 | 82.0664993 | 88.223733  | 99.7136032 | 4.47E-05 ***   | 1.13073558 | 0.1125296  |
| Succ     | C00042 | HK2-ASO1-MET     | 99.8113431 | 4.64420586 | 0.04652984 | 100.347058 | 94.9225111 | 104.16446  | 4.47E-05 ***   | 1.25398482 | 0.05834771 |
| Succ     | C00042 | HK2-ASO1-MET-PER | 108.052099 | 17.1133413 | 0.15838046 | 89.7982636 | 123.733753 | 110.624279 | 4.47E-05 ***   | 1.35751797 | 0.21500432 |
| Thr      | C00188 | Ctrl             | 684.62046  | 41.3429055 | 0.         |            |            |            |                |            |            |

|            |        |                  |             |            |            |            |             |            |            |     |            |            |
|------------|--------|------------------|-------------|------------|------------|------------|-------------|------------|------------|-----|------------|------------|
| Thr        | C00188 | HK2-ASO1-DPI-PER | 556.531202  | 54.3484568 | 0.09765572 | 589.142957 | 493.791395  | 586.659255 | 6.28E-08   | *** | 0.81290472 | 0.0793848  |
| Thr        | C00188 | HK2-ASO1-MET     | 594.497453  | 81.7662785 | 0.13753848 | 623.227606 | 502.243623  | 658.021131 | 6.28E-08   | *** | 0.86836063 | 0.119433   |
| Thr        | C00188 | HK2-ASO1-MET-PER | 461.080063  | 32.9482318 | 0.07145881 | 445.491983 | 498.929797  | 438.818408 | 6.28E-08   | *** | 0.67348274 | 0.04812627 |
| Trp        | C00078 | Ctrl             | 766.205494  | 30.3307272 | 0.03958563 | 731.741736 | 778.009546  | 788.859575 | 2.49E-06   | *** | 1          | 0.03958563 |
| Trp        | C00078 | HK2-ASO1         | 836.940717  | 133.271776 | 0.15923682 | 694.994726 | 856.436842  | 959.390582 | 2.49E-06   | *** | 1.09231887 | 0.17393738 |
| Trp        | C00078 | DPI              | 1000.33902  | 80.7232177 | 0.08069586 | 973.801567 | 936.225184  | 1090.9903  | 2.49E-06   | *** | 1.30557537 | 0.10535453 |
| Trp        | C00078 | MET              | 1136.12325  | 80.214676  | 0.07060385 | 1200.76504 | 1161.2521   | 1046.35261 | 2.49E-06   | *** | 1.48279184 | 0.10469081 |
| Trp        | C00078 | PER              | 892.6679    | 19.369828  | 0.02169881 | 891.45995  | 912.613434  | 873.930317 | 2.49E-06   | *** | 1.16505025 | 0.0252802  |
| Trp        | C00078 | HK2-ASO1-DPI     | 1301.28802  | 97.6163906 | 0.07501521 | 1236.12965 | 1254.21325  | 1413.52114 | 2.49E-06   | *** | 1.69835381 | 0.12740236 |
| Trp        | C00078 | HK2-ASO1-DPI-PER | 908.798199  | 108.22778  | 0.1190889  | 1008.49685 | 793.692559  | 924.205186 | 2.49E-06   | *** | 1.18610243 | 0.14125164 |
| Trp        | C00078 | HK2-ASO1-MET     | 877.542958  | 83.7332472 | 0.09541783 | 829.420107 | 828.979318  | 974.229449 | 2.49E-06   | *** | 1.14531019 | 0.10928302 |
| Trp        | C00078 | HK2-ASO1-MET-PER | 714.91553   | 64.9012677 | 0.09078173 | 781.003967 | 712.472186  | 651.270439 | 2.49E-06   | *** | 0.93305978 | 0.08470478 |
| Tyr        | C00082 | Ctrl             | 1329.25951  | 96.6258461 | 0.07269148 | 1241.19858 | 1313.95609  | 1432.62385 | 2.11E-07   | *** | 1          | 0.07269148 |
| Tyr        | C00082 | HK2-ASO1         | 1737.38395  | 119.476267 | 0.06876791 | NA         | 1652.90148  | 1821.86643 | 2.11E-07   | *** | 1.30703173 | 0.08988182 |
| Tyr        | C00082 | DPI              | 1744.87374  | 170.100247 | 0.09748571 | 1601.77899 | 1699.90068  | 1932.94156 | 2.11E-07   | *** | 1.31266599 | 0.12796617 |
| Tyr        | C00082 | MET              | 1909.63585  | 124.066409 | 0.06496862 | 2052.58387 | 1846.33928  | 1829.98439 | 2.11E-07   | *** | 1.43661628 | 0.09333498 |
| Tyr        | C00082 | PER              | 1547.14438  | 15.586398  | 0.0100743  | 1555.38086 | 1556.88457  | 1529.16771 | 2.11E-07   | *** | 1.16391447 | 0.01172562 |
| Tyr        | C00082 | HK2-ASO1-DPI     | 2270.68525  | 71.2807158 | 0.03139172 | 2216.2131  | 2244.48417  | 2351.35848 | 2.11E-07   | *** | 1.70823322 | 0.05362438 |
| Tyr        | C00082 | HK2-ASO1-DPI-PER | 1508.11047  | 151.910648 | 0.10072913 | 1631.26895 | 1338.36082  | 1554.70162 | 2.11E-07   | *** | 1.13454932 | 0.11428216 |
| Tyr        | C00082 | HK2-ASO1-MET     | 1511.78083  | 188.34428  | 0.12458438 | 1505.99259 | 1326.3974   | 1702.95252 | 2.11E-07   | *** | 1.13731053 | 0.11469113 |
| Tyr        | C00082 | HK2-ASO1-MET-PER | 1141.62535  | 81.5558565 | 0.07143837 | 1191.3348  | 1186.03885  | 1047.50241 | 2.11E-07   | *** | 0.8588431  | 0.06135435 |
| Tyramine   | C00483 | Ctrl             | 13.537646   | 2.36455982 | 0.17466551 | 13.6188188 | 15.8605743  | 11.133545  | 0.00097284 | *** | 1          | 0.17466551 |
| Tyramine   | C00483 | HK2-ASO1         | 13.5424121  | 3.82701237 | 0.28259459 | 17.8782593 | 10.6353387  | 12.1136377 | 0.00097284 | *** | 1.00035206 | 0.28269408 |
| Tyramine   | C00483 | DPI              | 7.37930793  | 0.6436345  | 0.27975028 | 5.3982131  | 7.22179442  | 9.51791628 | 0.00097284 | *** | 0.54509535 | 0.15249058 |
| Tyramine   | C00483 | MET              | 9.31782022  | 2.06971361 | 0.07481751 | 9.23336547 | 8.66675885  | 10.0533363 | 0.00097284 | *** | 0.68828955 | 0.05149611 |
| Tyramine   | C00483 | PER              | 4.1583457   | 1.21464749 | 0.29209873 | 3.47717978 | 3.43714796  | 5.56070936 | 0.00097284 | *** | 0.30716904 | 0.08972369 |
| Tyramine   | C00483 | HK2-ASO1-DPI     | 20.65642697 | 1.57951911 | 0.59460287 | 4.31376133 | 2.48716311  | 1.16835648 | 0.00097284 | *** | 0.19622518 | 0.11667605 |
| Tyramine   | C00483 | HK2-ASO1-DPI-PER | 10.7650909  | 1.14425556 | 0.10629316 | 10.3421205 | 12.0606161  | 9.89253604 | 0.00097284 | *** | 0.79519666 | 0.08452397 |
| Tyramine   | C00483 | HK2-ASO1-MET     | 14.4331081  | 7.30097168 | 0.50584889 | 11.1547067 | 9.34599854  | 22.7986192 | 0.00097284 | *** | 1.06614607 | 0.5393088  |
| Tyramine   | C00483 | HK2-ASO1-MET-PER | 11.947042   | 0.5576178  | 0.04667413 | 11.4552531 | 12.5528606  | 11.8330122 | 0.00097284 | *** | 0.88250512 | 0.04119016 |
| UDP        | C00015 | Ctrl             | 98.1277738  | 6.86714532 | 0.06998167 | 91.5436306 | 97.593035   | 105.246656 | 2.86E-13   | *** | 1          | 0.06998167 |
| UDP        | C00015 | HK2-ASO1         | 134.163647  | 16.8801647 | 0.12581772 | 153.459054 | 122.127343  | 126.904544 | 2.86E-13   | *** | 1.36723419 | 0.17202229 |
| UDP        | C00015 | DPI              | 127.261965  | 12.8228556 | 0.10075953 | 114.514459 | 127.112572  | 140.158864 | 2.86E-13   | *** | 1.29690056 | 0.13067509 |
| UDP        | C00015 | MET              | 120.424228  | 13.8665517 | 0.11514752 | 135.002961 | 118.868688  | 107.401044 | 2.86E-13   | *** | 1.22721859 | 0.14131118 |
| UDP        | C00015 | PER              | 103.046397  | 1.63725057 | 0.01588848 | 101.439472 | 102.987344  | 104.712375 | 2.86E-13   | *** | 1.05012468 | 0.01668488 |
| UDP        | C00015 | HK2-ASO1-DPI     | 65.1839279  | 6.13726843 | 0.09415309 | 72.2316577 | 61.0172628  | 62.3028631 | 2.86E-13   | *** | 0.66427603 | 0.06254364 |
| UDP        | C00015 | HK2-ASO1-DPI-PER | 16.6291458  | 1.67146561 | 0.10051422 | 17.5966633 | 14.6991056  | 17.5916984 | 2.86E-13   | *** | 0.16946421 | 0.01703356 |
| UDP        | C00015 | HK2-ASO1-MET     | 13.5307205  | 1.6793599  | 0.12411453 | 15.1685756 | 13.610859   | 11.812727  | 2.86E-13   | *** | 0.1378888  | 0.017114   |
| UDP        | C00015 | HK2-ASO1-MET-PER | 7.40535109  | 0.61968618 | 0.08368086 | 8.00631466 | 6.76850188  | 7.44123674 | 2.86E-13   | *** | 0.07546641 | 0.00631509 |
| UDP-Glc    | C00029 | Ctrl             | 4.71448349  | 4.470885   | 0.94832976 | 2.2949356  | 1.97480763  | 9.87370723 | 2.77E-19   | *** | 1          | 0.94832976 |
| UDP-Glc    | C00029 | HK2-ASO1         | 71.5707584  | 1.11781188 | 0.01561828 | 72.5702137 | 70.3636976  | 71.7783638 | 2.77E-19   | *** | 15.1810391 | 0.23710166 |
| UDP-Glc    | C00029 | DPI              | 53.2429987  | 3.06099369 | 0.05749101 | 50.1837394 | 56.3057239  | 53.239533  | 2.77E-19   | *** | 11.2934956 | 0.64927445 |
| UDP-Glc    | C00029 | MET              | 47.3461974  | 3.42579047 | 0.07235619 | 50.7278708 | 47.4327897  | 43.8779316 | 2.77E-19   | *** | 10.0427115 | 0.72665234 |
| UDP-Glc    | C00029 | PER              | 55.3838966  | 1.39700096 | 0.02522396 | 55.004073  | 56.9315315  | 54.2160852 | 2.77E-19   | *** | 11.7476064 | 0.2963211  |
| UDP-Glc    | C00029 | HK2-ASO1-DPI     | 23.2490288  | 0.99202379 | 0.04262697 | 23.7338988 | 23.9053635  | 22.1078241 | 2.77E-19   | *** | 4.93140529 | 0.21042046 |
| UDP-Glc    | C00029 | HK2-ASO1-DPI-PER | 1.21970427  | 0.66638183 | 0.54634705 | 1.9437029  | 1.08339109  | 0.63201883 | 2.77E-19   | *** | 0.2587143  | 0.14134779 |
| UDP-Glc    | C00029 | HK2-ASO1-MET     | 1.11207223  | 0.68183323 | 0.61311955 | 1.57627752 | 1.43067972  | 0.32925946 | 2.77E-19   | *** | 0.23588421 | 0.14462522 |
| UDP-Glc    | C00029 | HK2-ASO1-MET-PER | 0.2334393   | 0.19337529 | 0.82837507 | 0.45671936 | 0.11992466  | 0.12367388 | 2.77E-19   | *** | 0.04951535 | 0.04101178 |
| UDP-GlcNac | C00043 | Ctrl             | 9.59141558  | 1.02673649 | 0.10704744 | 9.70752769 | 10.55516    | 8.51155901 | 2.40E-13   | *** | 1          | 0.10704744 |
| UDP-GlcNac | C00043 | HK2-ASO1         | 9.40245703  | 0.17651444 | 0.01877323 | NA         | 9.27764247  | 9.52727159 | 2.40E-13   | *** | 0.9802992  | 0.01840338 |
| UDP-GlcNac | C00043 | DPI              | 9.96005077  | 1.4331466  | 0.14388949 | 10.8926366 | 10.6776591  | 8.30985671 | 2.40E-13   | *** | 1.03843387 | 0.14941972 |
| UDP-GlcNac | C00043 | MET              | 16.8431896  | 1.64332289 | 0.09756602 | 18.1419648 | 17.3918827  | 14.9957213 | 2.40E-13   | *** | 1.75606921 | 0.17133267 |
| UDP-GlcNac | C00043 | PER              | 8.78564999  | 0.08451465 | 0.00961962 | 8.88068076 | 8.7189099   | 8.7573593  | 2.40E-13   | *** | 0.91599096 | 0.00881149 |
| UDP-GlcNac | C00043 | HK2-ASO1-DPI     | 33.3852649  | 1.59642332 | 0.0478182  | 34.8352296 | 31.674499   | 33.6460661 | 2.40E-13   | *** | 3.48074428 | 0.16644293 |
| UDP-GlcNac | C00043 | HK2-ASO1-DPI-PER | 88.3346297  | 6.44121565 | 0.07291835 | 94.7692403 | 81.8868293  | 88.3478194 | 2.40E-13   | *** | 9.20975939 | 0.67156048 |
| UDP-GlcNac | C00043 | HK2-ASO1-MET     | 88.782263   | 10.1993437 | 0.11488042 | 100.345051 | 84.9381526  | 81.0635858 | 2.40E-13   | *** | 9.25642959 | 1.06338252 |
| UDP-GlcNac | C00043 | HK2-ASO1-MET-PER | 87.9293885  | 12.0363312 | 0.13688633 | 98.4291795 | 90.50654971 | 74.7934889 | 2.40E-13   | *** | 9.16750898 | 1.25490665 |
| UMP        | C00105 | Ctrl             | 13.1710402  | 1.8000985  | 0.13667094 | 11.4279177 | 13.0620415  | 15.0231612 | 1.27E-11   | *** | 1          | 0.13667094 |
| UMP        | C00105 | HK2-ASO1         | 32.0382759  | 5.04921884 | 0.15759958 | 37.3797988 | 27.3437283  | 31.3913006 | 1.27E-11   | *** | 2.4324788  | 0.38335764 |
| UMP        | C00105 | DPI              | 36.5205454  | 3.1657087  | 0.08668295 | 35.3135855 | 34.1358574  | 40.1121932 | 1.27E-11   | *** | 2.72779129 | 0.24035374 |
| UMP        | C00105 | MET              | 46.7323091  | 5.344257   | 0.11435893 | 51.7441919 | 47.3443568  | 41.1083786 | 1.27E-11   | *** | 3.54811074 | 0.40575816 |
| UMP        | C00105 | PER              | 17.0734441  | 2.8710264  | 0.16815743 | 20.3862348 | 15.5259323  | 15.3081651 | 1.27E-11   | *** | 1.29628669 | 0.21798023 |
| UMP        | C00105 | HK2-ASO1-DPI     | 24.6674743  | 2.68196163 | 0.10872461 | 22.112073  | 24.4301299  | 27.46022   | 1.27E-11   | *** | 1.87285697 | 0.20362565 |
| UMP        | C00105 | HK2-ASO1-DPI-PER | 9.04998761  | 0.58290131 | 0.06440907 | 8.41196697 | 9.5546621   | 9.18333375 | 1.27E-11   | *** | 0.6871126  | 0.04432682 |
| UMP        | C00105 | HK2-ASO1-MET     | 9.52529061  | 0.81761682 | 0.08583642 | 10.3968774 | 8.7752527   | 9.40374174 | 1.27E-11   | *** | 0.72319957 | 0.06207569 |
| UMP        | C00105 | HK2-ASO1-MET-PER | 6.30855082  | 1.07952669 | 0.17112119 | 7.23973597 | 6.56062708  | 5.12528942 | 1.27E-11   | *** | 0.47897135 | 0.08196214 |
| Uracil     | C00106 | Ctrl             | 1.11131822  | 0.22508298 | 0.20253693 | 0.8571955  | 1.2855874   | 1.19117175 | 5.02E-08   | *** | 1          | 0.20253693 |
| Uracil     | C00106 | HK2-ASO1         | 6.23338084  | 0.35299286 | 0.05662944 | 6.24015262 | 5.87705081  | 6.58293909 | 5.02E-08   | *** | 5.60899726 | 0.31763437 |
| Uracil     | C00106 | DPI              | 5.3301412   | 0.59527767 | 0.11168141 | 5.44754011 | 4.68491073  | 5.85797275 | 5.02E-08   | *** | 4.79623308 | 0.53565006 |
| Uracil     | C00106 | MET              | 7.23285356  | 2.18733925 | 0.30241219 | 9.67711127 | 5.45967464  | 6.56177478 | 5.02E-08   | *** | 6.50835508 | 1.96823845 |
| Uracil     | C00106 | PER              | 1.20087611  | 0.35337868 | 0.2942674  | 1.59489501 | 1.095727    | 0.91200631 | 5.02E-08   | *** | 1.08058708 | 0.31798155 |
| Uracil     | C00106 | HK2-ASO1-DPI     | 9.93176451  | 0.98266609 | 0.09894174 | 9.09160381 | 11.0123221  | 9.69136764 | 5.02E-08   | *** | 8.93692225 | 0.88423466 |
| Uracil     | C00106 | HK2-ASO1-DPI-PER | 10.5184822  | 1.28904656 | 0.12255062 | 9.95057839 | 9.61089934  | 11.9939688 | 5.02E-08   | *** | 9          |            |

|           |        |                  |            |            |            |            |            |            |                |            |            |
|-----------|--------|------------------|------------|------------|------------|------------|------------|------------|----------------|------------|------------|
| Uric Acid | C00366 | HK2-ASO1-MET-PER | 0.14364333 | 0.08003407 | 0.55717219 | 0.0630477  | 0.14477853 | 0.22310376 | 0.3270815      | 0.21186553 | 0.11804558 |
| Val       | C00183 | Ctrl             | 9672.73887 | 104.862456 | 0.01084103 | 9552.25793 | 9722.5203  | 9743.43839 | 2.32E-11 ***   | 1          | 0.01084103 |
| Val       | C00183 | HK2-ASO1         | 11556.3487 | 431.275755 | 0.03731938 | NA         | 11251.3907 | 11861.3067 | 2.32E-11 ***   | 1.19473387 | 0.04458673 |
| Val       | C00183 | DPI              | 11358.7587 | 290.816869 | 0.02560287 | 11049.7857 | 11399.3321 | 11627.1584 | 2.32E-11 ***   | 1.17430635 | 0.03006562 |
| Val       | C00183 | MET              | 10504.7416 | 59.4617258 | 0.00566047 | 10522.7703 | 10438.3519 | 10553.1024 | 2.32E-11 ***   | 1.08601521 | 0.00614735 |
| Val       | C00183 | PER              | 10366.1035 | 269.590551 | 0.02600693 | 10055.1042 | 10533.377  | 10509.8295 | 2.32E-11 ***   | 1.07168235 | 0.02787117 |
| Val       | C00183 | HK2-ASO1-DPI     | 14302.4999 | 287.399805 | 0.02009438 | 14001.2705 | 14332.5151 | 14573.7142 | 2.32E-11 ***   | 1.47864014 | 0.02971235 |
| Val       | C00183 | HK2-ASO1-DPI-PER | 12722.8034 | 73.1749591 | 0.00575148 | 12781.0028 | 12640.6547 | 12746.7527 | 2.32E-11 ***   | 1.31532584 | 0.00756507 |
| Val       | C00183 | HK2-ASO1-MET     | 13500.8645 | 740.554417 | 0.05485237 | 13763.5963 | 14074.2325 | 12664.7647 | 2.32E-11 ***   | 1.39576439 | 0.07656099 |
| Val       | C00183 | HK2-ASO1-MET-PER | 12653.7065 | 74.1833432 | 0.00586258 | 12736.0984 | 12592.2165 | 12632.8047 | 2.32E-11 ***   | 1.30818238 | 0.00766932 |
| Vit-C     | C00072 | Ctrl             | 3.82564173 | 0.86720456 | 0.22668211 | 4.82647154 | 3.35348465 | 3.296969   | 0.01452776 *   | 1          | 0.22668211 |
| Vit-C     | C00072 | HK2-ASO1         | 3.56748173 | 0.38545845 | 0.10804777 | 3.88597536 | 3.67749236 | 3.13897747 | 0.01452776 *   | 0.93251851 | 0.10075655 |
| Vit-C     | C00072 | DPI              | 3.91405443 | 0.25371554 | 0.06482167 | 4.20602896 | 3.7889175  | 3.74721684 | 0.01452776 *   | 1.02311055 | 0.06631973 |
| Vit-C     | C00072 | MET              | 4.90213559 | 0.46974117 | 0.09582378 | 4.9473391  | 4.41142675 | 5.34764092 | 0.01452776 *   | 1.28138909 | 0.12278755 |
| Vit-C     | C00072 | PER              | 4.24348489 | 1.10778603 | 0.26105573 | 4.065486   | 3.23547605 | 5.42949263 | 0.01452776 *   | 1.10921272 | 0.28956868 |
| Vit-C     | C00072 | HK2-ASO1-DPI     | 3.6314777  | 0.53986731 | 0.14866326 | 3.36875611 | 3.27325731 | 4.25241969 | 0.01452776 *   | 0.94924668 | 0.14111811 |
| Vit-C     | C00072 | HK2-ASO1-DPI-PER | 4.57700074 | 0.42099898 | 0.09198141 | 4.75326842 | 4.09651831 | 4.8812155  | 0.01452776 *   | 1.19640078 | 0.11004663 |
| Vit-C     | C00072 | HK2-ASO1-MET     | 5.11038885 | 1.3301681  | 0.26028706 | 3.60688369 | 5.59020148 | 6.13408138 | 0.01452776 *   | 1.33582526 | 0.34769803 |
| Vit-C     | C00072 | HK2-ASO1-MET-PER | 5.94143134 | 0.57429712 | 0.09665972 | 6.33678571 | 5.28268109 | 6.20482721 | 0.01452776 *   | 1.55305482 | 0.15011785 |
| Xanthine  | C00385 | Ctrl             | 0.94326562 | 0.54782645 | 0.58077644 | 1.53220238 | 0.84874459 | 0.4488499  | 0.00036195 *** | 1          | 0.58077644 |
| Xanthine  | C00385 | HK2-ASO1         | 0.36947545 | 0.19627538 | 0.53122712 | NA         | 0.2306878  | 0.5082631  | 0.00036195 *** | 0.3916982  | 0.20808071 |
| Xanthine  | C00385 | DPI              | 0.49232208 | 0.07320306 | 0.14868936 | 0.46999205 | 0.43288458 | 0.57408961 | 0.00036195 *** | 0.52193366 | 0.07760598 |
| Xanthine  | C00385 | MET              | 0.6993004  | 0.33364826 | 0.47711721 | 0.9869684  | 0.33352834 | 0.77740445 | 0.00036195 *** | 0.74136106 | 0.35371612 |
| Xanthine  | C00385 | PER              | 1.05257355 | 0.41104025 | 0.39050976 | 1.51601789 | 0.73214626 | 0.9095565  | 0.00036195 *** | 1.11588245 | 0.43576299 |
| Xanthine  | C00385 | HK2-ASO1-DPI     | 0.47959891 | 0.26981834 | 0.56259166 | 0.2715246  | 0.38281089 | 0.78446123 | 0.00036195 *** | 0.50844523 | 0.28604704 |
| Xanthine  | C00385 | HK2-ASO1-DPI-PER | 2.92185413 | 0.95769101 | 0.32776825 | 3.77704201 | 1.88708448 | 3.1014359  | 0.00036195 *** | 3.09759421 | 1.01529303 |
| Xanthine  | C00385 | HK2-ASO1-MET     | 8.21683557 | 6.79419312 | 0.82686249 | 3.41261554 | NA         | 13.0210556 | 0.00036195 *** | 8.71105168 | 7.20284188 |
| Xanthine  | C00385 | HK2-ASO1-MET-PER | 7.04797526 | 0.27287265 | 0.03871646 | 7.1870562  | 7.22328546 | 6.73358412 | 0.00036195 *** | 7.47188819 | 0.28928505 |
